# Supplementary material for: A data-driven approach to predicting band gap, excitation, and emission energies for Eu2+-activated phosphors
Source: Royal Society of Chemistry journal article supplement (doi:10.1039/d1qi00766a), 2021-01-01
Supplement: d1qi00766a1.pdf [file d1qi00766a1.pdf]

## Supplementary Information

### A data-driven approach to predicting band gap, excitation, and emission energies for Eu<sup>2+</sup>-activated phosphors

Chaewon Park<sup>a,†</sup>, Jin-Woong Lee<sup>a,†</sup>, Minseuk Kim<sup>a,†</sup>, Byung Do Lee, Satendra Pal Singh,<sup>a</sup> Woon Bae Park<sup>b,\*</sup>, and Kee-Sun Sohn<sup>a,\*</sup>

<sup>a</sup>Nanotechnology & Advanced Materials Engineering, Sejong University, 209 Neungdong-ro, Gwangjin-gu, Seoul, 143-747, South Korea

<sup>b</sup>Department of Printed Electronics, Suncheon National University, 291-19 Jungang-ro, Suncheon, Chonnam, 540-742, South Korea

<sup>†</sup>These authors contributed equally

Corresponding authors: kssohn@sejong.ac.kr, wbpark@scnu.ac.kr

## List of Contents

**Table S1.** All the attempted hyper-parameter sets for each algorithm, which is a search space mesh to be screened to discover the best set. The finally selected set is highlighted in bold font.

**Table S2.** Details of the validation MSE and  $R^2$  values for all the hyper-parameter sets (9-fold cross-validation with no holdout dataset test). The hyper parameter screening process is based on the PEW prediction model since it is a baseline that showed worse fitting quality in comparison to both the EBEW and  $E_g$  prediction models.

**Table S3.** 29 descriptors and their evaluation results for 91 different  $\text{Eu}^{2+}$ -activated phosphors.

**Table S4.** The training, validation and hold-out dataset test results for (a) EBEW and (b)  $E_g$  prediction models in terms of MSE and  $R^2$  using two data-splitting schemes: 9-cross-validation and 8-fold cross-validation with a holdout test dataset.

**Table S5.** The training and validation results for (a) PEW, (b) EBEW, and (c)  $E_g$  prediction models in terms of MSE for leave-one-out cross-validation with no holdout test dataset. Note that  $R^2$  is unavailable for the leave-one-out cross-validation scheme.

**Table S6.** Over-fitting index for (a) PEW, (b) EBEW, and (c)  $E_g$  prediction models in terms of  $\text{Training\_MSE}/\text{Validation\_MSE}$ ,  $\text{Validation\_}R^2/\text{Training\_}R^2$ ,  $\text{Training\_MSE}/\text{Test\_MSE}$  and  $\text{Test\_}R^2/\text{Training\_}R^2$  for 9- and 8-fold cross validations.

**Table S7.** Summary of the surrogate ML model regression results for (a) PEW, (b) EBEW, and (c)  $E_g$  prediction models. The training, validation and test results in terms of MSE,  $R^2$ , and over-fitting index for 8-fold cross validation with a holdout dataset test.

**Fig. S1** The training, validation and hold-out dataset test results for PEW prediction in terms of (a,e) MSE and (b,f)  $R^2$  for 9 cross validation and 8-fold cross validation with a holdout dataset test, (c,g) the over-fitting index defined as  $\text{Training\_MSE}/\text{Validation\_MSE}$  and  $\text{Validation\_R}^2/\text{Training\_R}^2$ , and (d,f) the over-fitting index defined as  $\text{Training\_MSE}/\text{Test\_MSE}$  and  $\text{Test\_R}^2/\text{Training\_R}^2$ . (a)~(d) stand for EBEW prediction model results and (e)~(h) for  $E_g$  results.

**Fig. S2** Plots of predicted vs. experimental (a) PEW, (b) EBEW, and (c)  $E_g$  for training and validation datasets for 9-fold cross validation.

**Fig. S3** Plots of ML-predicted vs. experimental (a) PEW, (b) EBEW, and (c)  $E_g$  for every ML algorithm for leave-one-out cross-validation with no holdout test dataset.

**Fig. S4** The surrogate ML model regression results. Plots of the ML-predicted vs. experimental (a) PEW, (b) EBEW, and (c)  $E_g$  for every ML algorithm for 8-fold cross-validation with a holdout dataset test.

**Table S1.** All the attempted hyper-parameter sets for each algorithm, which is a search space mesh to be screened to discover the best set. The finally selected set is highlighted in bold font.

| Ridge      |  | lasso        | LARS         |  | ENR        |              |
|------------|--|--------------|--------------|--|------------|--------------|
| alpha      |  | alpha        | alpha        |  | l1_ratio   | alpha        |
|            |  | 0.00001      |              |  |            |              |
|            |  | 0.00005      |              |  |            |              |
| 0.001      |  | 0.0001       |              |  |            | <b>0.001</b> |
| 0.005      |  | 0.0005       | 0.0001       |  |            | 0.005        |
| 0.01       |  | <b>0.001</b> | <b>0.001</b> |  | 0.3        | 0.01         |
| 0.05       |  | 0.005        | 0.01         |  | 0.5        | 0.05         |
| 0.1        |  | 0.01         | 0.1          |  | <b>0.7</b> | 0.1          |
| <b>0.5</b> |  | 0.05         | 1            |  |            | 0.5          |
| 1          |  | 0.1          |              |  |            | 1            |
|            |  | 0.5          |              |  |            |              |
|            |  | 1            |              |  |            |              |

  

| KRR            |             | BRR            | ARD          |              |              |              |
|----------------|-------------|----------------|--------------|--------------|--------------|--------------|
| kernel         | alpha       | tol            | alpha_1      | alpha_2      | lambda_1     | lambda_2     |
| linear         |             | <b>0.00001</b> |              |              |              |              |
| poly           | 0.001       | 0.0001         | 1e-04        | <b>1e-04</b> | <b>1e-04</b> | 1e-04        |
| rbf            | <b>0.01</b> | 0.001          | 1e-06        | 1e-06        | 1e-06        | <b>1e-06</b> |
| <b>sigmoid</b> | 0.1         | 0.01           | <b>1e-08</b> | 1e-08        | 1e-08        | 1e-08        |
| matern         | 1           | 0.1            |              |              |              |              |

  

| RF           |              |           | Ada Boost     |               |              |
|--------------|--------------|-----------|---------------|---------------|--------------|
| max_features | n_estimators | max_depth | loss          | learning_rate | n_estimators |
| auto         | 50           | 5         | exponential   | 0.001         | <b>50</b>    |
| log2         | <b>100</b>   | <b>10</b> | linear        | <b>0.01</b>   | 100          |
| <b>sqrt</b>  | 150          | 15        | <b>square</b> | 0.1           | 150          |
|              |              |           |               | 1             |              |

Gradient Boost

| loss       | subsample  | learning_rate | n_estimators |
|------------|------------|---------------|--------------|
| ls         | 0.4        | 0.001         | 50           |
| <b>lad</b> | <b>0.7</b> | 0.01          | <b>100</b>   |
| huber      | 1          | <b>0.1</b>    | 150          |
| quantile   |            | 1             |              |

| XG Boost   |               |           | SVR           |          |
|------------|---------------|-----------|---------------|----------|
| subsample  | learning_rate | max_depth | kernel        | c        |
|            | 0.001         |           | <b>linear</b> | 0.001    |
| <b>0.4</b> | 0.01          | <b>4</b>  | poly          | 0.01     |
| 0.7        | <b>0.1</b>    | 6         | rbf           | 0.1      |
| 1          | 1             | 8         | sigmoid       | <b>1</b> |
|            |               |           | matern        |          |

| KNN             |             | PLS      |              | GPR           |              |            |              |
|-----------------|-------------|----------|--------------|---------------|--------------|------------|--------------|
| weights         | n_neighbors | p        | n_components | kernel        | length_scale | nu         | alpha        |
|                 | <b>3</b>    |          |              |               |              |            | 1e-01        |
|                 | 5           |          |              |               | 1            | <b>0.5</b> | 1e-04        |
| uniform         | 7           | <b>1</b> |              |               | <b>10</b>    | 1.5        | 1e-07        |
| <b>distance</b> | 11          | 2        | <b>1</b>     | <b>matern</b> | 100          | 2.5        | <b>1e-10</b> |
|                 | 13          |          |              |               |              |            |              |

**Table S2.** Details of the validation MSE and  $R^2$  values for all the hyper-parameter sets (9-fold cross-validation with no holdout dataset test). The hyper parameter screening process is based on the PEW prediction model since it is a baseline that showed worse fitting quality in comparison to both the EBEW and  $E_g$  prediction models.

| Ridge           |                   |                    |                    |                    |
|-----------------|-------------------|--------------------|--------------------|--------------------|
| hyper parameter | Regression result |                    |                    |                    |
| alpha           | MSE (training)    | $R^2$ (training)   | MSE (validation)   | $R^2$ (validation) |
| 0.001           | 0.011135689       | 0.803128148        | 0.025556201        | 0.482478192        |
| 0.005           | 0.011072263       | 0.80444746         | 0.026817088        | 0.496703389        |
| 0.01            | 0.01109431        | 0.804057755        | 0.026098383        | 0.511561206        |
| 0.05            | 0.011296572       | 0.80046335         | 0.023830077        | 0.5560478          |
| 0.1             | 0.011545196       | 0.79605114         | 0.022758552        | 0.577783215        |
| <b>0.5</b>      | <b>0.01335052</b> | <b>0.764062538</b> | <b>0.021242255</b> | <b>0.617683994</b> |
| 1               | 0.015162412       | 0.732088215        | 0.02182785         | 0.611494981        |

| Lasso           |                    |                    |                    |                    |
|-----------------|--------------------|--------------------|--------------------|--------------------|
| hyper parameter | Regression result  |                    |                    |                    |
| alpha           | MSE (training)     | $R^2$ (training)   | MSE (validation)   | $R^2$ (validation) |
| 0.00001         | 0.011136036        | 0.803122059        | 0.025572297        | 0.482480705        |
| 0.00005         | 0.011084831        | 0.80422242         | 0.026574723        | 0.499839942        |
| 0.0001          | 0.011149394        | 0.803083162        | 0.025495275        | 0.523081344        |
| 0.0005          | 0.01231518         | 0.78231046         | 0.022151031        | 0.592592334        |
| <b>0.001</b>    | <b>0.013409026</b> | <b>0.763006584</b> | <b>0.021753577</b> | <b>0.603333314</b> |
| 0.005           | 0.021266607        | 0.623791844        | 0.025226279        | 0.56129263         |
| 0.01            | 0.029494771        | 0.478999474        | 0.031745084        | 0.441370422        |
| 0.05            | 0.056602334        | 0                  | 0.057069362        | -0.029931033       |
| 0.1             | 0.056602334        | 0                  | 0.057069362        | -0.029931033       |
| 0.5             | 0.056602334        | 0                  | 0.057069362        | -0.029931033       |
| 1               | 0.056602334        | 0                  | 0.057069362        | -0.029931033       |

| LARS            |                    |                    |                    |                    |
|-----------------|--------------------|--------------------|--------------------|--------------------|
| hyper parameter | Regression result  |                    |                    |                    |
| alpha           | MSE (training)     | $R^2$ (training)   | MSE (validation)   | $R^2$ (validation) |
| 0.0001          | 0.011311751        | 0.800208392        | 0.024355121        | 0.546031898        |
| <b>0.001</b>    | <b>0.015087763</b> | <b>0.733360597</b> | <b>0.021306499</b> | <b>0.616375177</b> |

|      |             |             |             |              |
|------|-------------|-------------|-------------|--------------|
| 0.01 | 0.041028619 | 0.273706974 | 0.043413704 | 0.234864208  |
| 0.1  | 0.056602334 | 4.27E-09    | 0.057069361 | -0.029931029 |
| 1    | 0.056602334 | 4.27E-09    | 0.057069361 | -0.029931029 |

ENR

| hyper parameter |              | Regression result  |                           |                    |                             |
|-----------------|--------------|--------------------|---------------------------|--------------------|-----------------------------|
| l1_ratio        | alpha        | MSE (training)     | R <sup>2</sup> (training) | MSE (validation)   | R <sup>2</sup> (validation) |
| 0.3             | 0.001        | 0.011973131        | 0.788373443               | 0.022389517        | 0.58883475                  |
| 0.3             | 0.005        | 0.015736512        | 0.721911266               | 0.022328867        | 0.600646611                 |
| 0.3             | 0.01         | 0.019669904        | 0.652021549               | 0.024576333        | 0.567336219                 |
| 0.3             | 0.05         | 0.041156261        | 0.27175795                | 0.04308714         | 0.243702218                 |
| 0.3             | 0.1          | 0.053755648        | 0.049528148               | 0.05470799         | 0.022399118                 |
| 0.3             | 0.5          | 0.056602334        | 0                         | 0.057069362        | -0.029931033                |
| 0.3             | 1            | 0.056602334        | 0                         | 0.057069362        | -0.029931033                |
| 0.5             | 0.001        | 0.012454493        | 0.77985791                | 0.021766916        | 0.601416456                 |
| 0.5             | 0.005        | 0.017424541        | 0.692077694               | 0.023230615        | 0.587327171                 |
| 0.5             | 0.01         | 0.022637358        | 0.599655275               | 0.025812876        | 0.552813834                 |
| 0.5             | 0.05         | 0.04930378         | 0.128116178               | 0.05045746         | 0.10950693                  |
| 0.5             | 0.1          | 0.056602334        | 0                         | 0.057069362        | -0.029931033                |
| 0.5             | 0.5          | 0.056602334        | 0                         | 0.057069362        | -0.029931033                |
| 0.5             | 1            | 0.056602334        | 0                         | 0.057069362        | -0.029931033                |
| <b>0.7</b>      | <b>0.001</b> | <b>0.012877068</b> | <b>0.772391626</b>        | <b>0.021565477</b> | <b>0.605604885</b>          |
| 0.7             | 0.005        | 0.019073097        | 0.662960361               | 0.024091012        | 0.573401764                 |
| 0.7             | 0.01         | 0.025423814        | 0.550243838               | 0.028590334        | 0.504191404                 |
| 0.7             | 0.05         | 0.055361483        | 0.021309143               | 0.056150747        | -0.00922199                 |
| 0.7             | 0.1          | 0.056602334        | 0                         | 0.057069362        | -0.029931033                |
| 0.7             | 0.5          | 0.056602334        | 0                         | 0.057069362        | -0.029931033                |
| 0.7             | 1            | 0.056602334        | 0                         | 0.057069362        | -0.029931033                |

KRR

| hyper parameter |       |        |       |     | Regression result |                   |                              |                     |                                |
|-----------------|-------|--------|-------|-----|-------------------|-------------------|------------------------------|---------------------|--------------------------------|
| kernel          | alpha | degree | coef0 | nu  | length<br>_scale  | MSE<br>(training) | R <sup>2</sup><br>(training) | MSE<br>(validation) | R <sup>2</sup><br>(validation) |
| matern          | 0.001 | x      | x     | 0.5 | 1                 | 1.26E-07          | 1                            | 0.03131853          | 0.4479017                      |
| matern          | 0.001 | x      | x     | 0.5 | 10                | 7.16E-06          | 0.99987                      | 0.02338267          | 0.6125445                      |
| matern          | 0.001 | x      | x     | 0.5 | 100               | 0.000353          | 0.99376                      | 0.0231648           | 0.6139814                      |

|        |       |   |   |     |     |          |         |            |           |
|--------|-------|---|---|-----|-----|----------|---------|------------|-----------|
| matern | 0.001 | x | x | 1.5 | 1   | 1.16E-05 | 0.99979 | 0.030605   | 0.4562373 |
| matern | 0.001 | x | x | 1.5 | 10  | 0.002457 | 0.95656 | 0.02260727 | 0.5515607 |
| matern | 0.001 | x | x | 1.5 | 100 | 0.021522 | 0.6198  | 0.02712693 | 0.5208853 |
| matern | 0.001 | x | x | 2.5 | 1   | 2.79E-05 | 0.99951 | 0.03155413 | 0.4364936 |
| matern | 0.001 | x | x | 2.5 | 10  | 0.007219 | 0.87242 | 0.02340218 | 0.5601493 |
| matern | 0.001 | x | x | 2.5 | 100 | 0.026618 | 0.52978 | 0.03166495 | 0.4390331 |
| matern | 0.01  | x | x | 0.5 | 1   | 1.11E-05 | 0.9998  | 0.03145168 | 0.4448866 |
| matern | 0.01  | x | x | 0.5 | 10  | 3.65E-04 | 0.99356 | 0.02356186 | 0.6072166 |
| matern | 0.01  | x | x | 0.5 | 100 | 0.007061 | 0.87531 | 0.02582228 | 0.56127   |
| matern | 0.01  | x | x | 1.5 | 1   | 7.76E-05 | 0.99863 | 0.03033539 | 0.4608959 |
| matern | 0.01  | x | x | 1.5 | 10  | 0.0097   | 0.82848 | 0.02071587 | 0.5978812 |
| matern | 0.01  | x | x | 1.5 | 100 | 0.0447   | 0.20993 | 0.04772412 | 0.1502703 |
| matern | 0.01  | x | x | 2.5 | 1   | 0.000117 | 0.99793 | 0.03117043 | 0.4427243 |
| matern | 0.01  | x | x | 2.5 | 10  | 0.012983 | 0.77057 | 0.02179301 | 0.6088891 |
| matern | 0.01  | x | x | 2.5 | 100 | 0.048867 | 0.13642 | 0.0509655  | 0.0886685 |
| matern | 0.1   | x | x | 0.5 | 1   | 0.000677 | 0.98804 | 0.03276309 | 0.4171324 |
| matern | 0.1   | x | x | 0.5 | 10  | 0.007416 | 0.86903 | 0.02667446 | 0.5456935 |
| matern | 0.1   | x | x | 0.5 | 100 | 0.032241 | 0.43049 | 0.04078995 | 0.2752183 |
| matern | 0.1   | x | x | 1.5 | 1   | 0.001231 | 0.97824 | 0.03101435 | 0.4441463 |
| matern | 0.1   | x | x | 1.5 | 10  | 0.022742 | 0.59839 | 0.02911027 | 0.4844626 |
| matern | 0.1   | x | x | 1.5 | 100 | 0.054975 | 0.02876 | 0.05578959 | -0.00583  |
| matern | 0.1   | x | x | 2.5 | 1   | 0.001623 | 0.97131 | 0.03138822 | 0.4343769 |
| matern | 0.1   | x | x | 2.5 | 10  | 0.026977 | 0.52344 | 0.03227501 | 0.4277512 |
| matern | 0.1   | x | x | 2.5 | 100 | 0.055657 | 0.01671 | 0.05632559 | -0.015903 |
| matern | 1     | x | x | 0.5 | 1   | 0.01551  | 0.72582 | 0.04306339 | 0.2107791 |
| matern | 1     | x | x | 0.5 | 10  | 0.033683 | 0.405   | 0.04225081 | 0.2465299 |
| matern | 1     | x | x | 0.5 | 100 | 0.052385 | 0.07455 | 0.05429273 | 0.0227077 |
| matern | 1     | x | x | 1.5 | 1   | 0.016806 | 0.70289 | 0.03997971 | 0.2627323 |
| matern | 1     | x | x | 1.5 | 10  | 0.046585 | 0.17701 | 0.0492339  | 0.1160781 |
| matern | 1     | x | x | 1.5 | 100 | 0.056473 | 0.00228 | 0.05697739 | -0.027873 |
| matern | 1     | x | x | 2.5 | 1   | 0.017643 | 0.68809 | 0.03965145 | 0.2633001 |
| matern | 1     | x | x | 2.5 | 10  | 0.049262 | 0.12971 | 0.0512775  | 0.0781172 |
| matern | 1     | x | x | 2.5 | 100 | 0.056546 | 0.001   | 0.05703365 | -0.028926 |
| linear | 0.001 | x | x | x   | x   | 0.011142 | 0.80322 | 0.0265379  | 0.5046012 |
| linear | 0.01  | x | x | x   | x   | 0.011152 | 0.80305 | 0.02543495 | 0.5256411 |
| linear | 0.1   | x | x | x   | x   | 0.011554 | 0.79589 | 0.02232344 | 0.5864969 |
| linear | 1     | x | x | x   | x   | 0.014932 | 0.73615 | 0.02136055 | 0.6170885 |



|                |             |          |          |          |          |                |               |                 |                 |
|----------------|-------------|----------|----------|----------|----------|----------------|---------------|-----------------|-----------------|
| poly           | 0.001       | 2        | 1        | x        | x        | 0.004166       | 0.92632       | 0.02650169      | 0.481971        |
| poly           | 0.001       | 3        | 1        | x        | x        | 0.001863       | 0.9671        | 0.02842289      | 0.4005312       |
| poly           | 0.001       | 4        | 1        | x        | x        | 0.000895       | 0.98421       | 0.03698163      | 0.314116        |
| poly           | 0.01        | 2        | 1        | x        | x        | 0.009394       | 0.834         | 0.02236242      | 0.5844605       |
| poly           | 0.01        | 3        | 1        | x        | x        | 0.00678        | 0.8801        | 0.02207427      | 0.5610954       |
| poly           | 0.01        | 4        | 1        | x        | x        | 0.004681       | 0.91722       | 0.02312577      | 0.5384987       |
| poly           | 0.1         | 2        | 1        | x        | x        | 0.015438       | 0.72723       | 0.02235553      | 0.6025348       |
| poly           | 0.1         | 3        | 1        | x        | x        | 0.012904       | 0.77198       | 0.02182598      | 0.6082886       |
| poly           | 0.1         | 4        | 1        | x        | x        | 0.011049       | 0.80465       | 0.02039386      | 0.6057275       |
| poly           | 1           | 2        | 1        | x        | x        | 0.034368       | 0.39285       | 0.0387839       | 0.3077806       |
| poly           | 1           | 3        | 1        | x        | x        | 0.027896       | 0.50719       | 0.03319374      | 0.4095484       |
| poly           | 1           | 4        | 1        | x        | x        | 0.023232       | 0.58959       | 0.02922984      | 0.4811393       |
| rbf            | 0.001       | x        | x        | x        | x        | 0.002876       | 0.9492        | 0.02551404      | 0.4699683       |
| rbf            | 0.01        | x        | x        | x        | x        | 0.008537       | 0.84903       | 0.02109657      | 0.5819734       |
| rbf            | 0.1         | x        | x        | x        | x        | 0.016385       | 0.7105        | 0.02386318      | 0.5752583       |
| rbf            | 1           | x        | x        | x        | x        | 0.03725        | 0.34192       | 0.04150431      | 0.2570324       |
| sigmoid        | 0.001       | x        | 1        | x        | x        | 0.074878       | -0.32517      | 0.05748358      | -0.133501       |
| <b>sigmoid</b> | <b>0.01</b> | <b>x</b> | <b>1</b> | <b>x</b> | <b>x</b> | <b>0.01614</b> | <b>0.7147</b> | <b>0.021063</b> | <b>0.624649</b> |
| sigmoid        | 0.1         | x        | 1        | x        | x        | 0.031364       | 0.44593       | 0.03569768      | 0.3650124       |
| sigmoid        | 1           | x        | 1        | x        | x        | 0.051315       | 0.09345       | 0.05282752      | 0.0496871       |

BRR

| hyper parameter |                    | Regression result         |                    |                             |  |
|-----------------|--------------------|---------------------------|--------------------|-----------------------------|--|
| tol             | MSE (training)     | R <sup>2</sup> (training) | MSE (validation)   | R <sup>2</sup> (validation) |  |
| <b>0.0001</b>   | <b>0.013037243</b> | <b>0.769688218</b>        | <b>0.021596336</b> | <b>0.606056148</b>          |  |
| 0.0001          | 0.013037233        | 0.769688396               | 0.021596336        | 0.60605609                  |  |
| 0.001           | 0.013037151        | 0.769689843               | 0.021596338        | 0.606055674                 |  |
| 0.01            | 0.013036234        | 0.769706092               | 0.021596291        | 0.606053311                 |  |
| 0.1             | 0.013025769        | 0.76989143                | 0.021595167        | 0.606046599                 |  |

ARD

| hyper parameter |          |          |          | Regression result |                           |                  |                             |
|-----------------|----------|----------|----------|-------------------|---------------------------|------------------|-----------------------------|
| alpha_1         | alpha_2  | lambda_1 | lambda_2 | MSE (training)    | R <sup>2</sup> (training) | MSE (validation) | R <sup>2</sup> (validation) |
| 1.00E-04        | 1.00E-04 | 1.00E-04 | 1.00E-04 | 0.0136            | 0.7592                    | 0.0217           | 0.6034                      |
| 1.00E-04        | 1.00E-04 | 1.00E-04 | 1.00E-06 | 0.0140            | 0.7520                    | 0.0213           | 0.6118                      |





|          |          |          |          |        |        |        |        |
|----------|----------|----------|----------|--------|--------|--------|--------|
| 1.00E-08 | 1.00E-08 | 1.00E-06 | 1.00E-06 | 0.0140 | 0.7520 | 0.0213 | 0.6118 |
| 1.00E-08 | 1.00E-08 | 1.00E-06 | 1.00E-08 | 0.0140 | 0.7532 | 0.0210 | 0.6092 |
| 1.00E-08 | 1.00E-08 | 1.00E-08 | 1.00E-04 | 0.0136 | 0.7593 | 0.0217 | 0.6034 |
| 1.00E-08 | 1.00E-08 | 1.00E-08 | 1.00E-06 | 0.0140 | 0.7520 | 0.0213 | 0.6118 |
| 1.00E-08 | 1.00E-08 | 1.00E-08 | 1.00E-08 | 0.0140 | 0.7532 | 0.0210 | 0.6092 |

| RF              |              |           |                   |                              |                     |                                |
|-----------------|--------------|-----------|-------------------|------------------------------|---------------------|--------------------------------|
| hyper parameter |              |           | Regression result |                              |                     |                                |
| max_features    | n_estimators | max_depth | MSE<br>(training) | R <sup>2</sup><br>(training) | MSE<br>(validation) | R <sup>2</sup><br>(validation) |
| auto            | 50           | 5         | 0.006265          | 0.889339                     | 0.02501878          | 0.54913132                     |
| auto            | 50           | 10        | 0.00351           | 0.938009                     | 0.02381634          | 0.56988986                     |
| auto            | 50           | 15        | 0.003493          | 0.938304                     | 0.02409065          | 0.56634305                     |
| auto            | 100          | 5         | 0.005802          | 0.897588                     | 0.02498501          | 0.54967559                     |
| auto            | 100          | 10        | 0.003692          | 0.934824                     | 0.02353246          | 0.56650378                     |
| auto            | 100          | 15        | 0.003672          | 0.935192                     | 0.02375659          | 0.56827481                     |
| auto            | 150          | 5         | 0.005819          | 0.897301                     | 0.02498908          | 0.54782883                     |
| auto            | 150          | 10        | 0.00357           | 0.937025                     | 0.02361944          | 0.5693722                      |
| auto            | 150          | 15        | 0.003542          | 0.937531                     | 0.0237654           | 0.57142196                     |
| log2            | 50           | 5         | 0.00875           | 0.845578                     | 0.02760483          | 0.53312746                     |
| log2            | 50           | 10        | 0.003867          | 0.931674                     | 0.02494953          | 0.56857106                     |
| log2            | 50           | 15        | 0.003708          | 0.934487                     | 0.0250613           | 0.55381279                     |
| log2            | 100          | 5         | 0.008263          | 0.853761                     | 0.025563            | 0.53026635                     |
| log2            | 100          | 10        | 0.003805          | 0.932805                     | 0.02440948          | 0.58343255                     |
| log2            | 100          | 15        | 0.00369           | 0.934843                     | 0.02442876          | 0.57774216                     |
| log2            | 150          | 5         | 0.008465          | 0.850591                     | 0.02659496          | 0.5359652                      |
| log2            | 150          | 10        | 0.003719          | 0.934377                     | 0.02485223          | 0.57801827                     |
| log2            | 150          | 15        | 0.003593          | 0.936573                     | 0.02480667          | 0.57089401                     |
| sqrt            | 50           | 5         | 0.008107          | 0.857104                     | 0.0256093           | 0.55939493                     |
| sqrt            | 50           | 10        | 0.003587          | 0.936607                     | 0.02388609          | 0.58032151                     |
| sqrt            | 50           | 15        | 0.003419          | 0.939549                     | 0.02402252          | 0.57666628                     |
| sqrt            | 100          | 5         | 0.007639          | 0.865291                     | 0.02546824          | 0.56099945                     |
| <b>sqrt</b>     | <b>100</b>   | <b>10</b> | <b>0.00381</b>    | <b>0.93277</b>               | <b>0.024784</b>     | <b>0.584808</b>                |
| sqrt            | 100          | 15        | 0.003731          | 0.934136                     | 0.02492709          | 0.58205772                     |
| sqrt            | 150          | 5         | 0.007801          | 0.862382                     | 0.02568271          | 0.55288677                     |
| sqrt            | 150          | 10        | 0.003697          | 0.934693                     | 0.02494066          | 0.58350872                     |
| sqrt            | 150          | 15        | 0.003592          | 0.936602                     | 0.02459363          | 0.57459597                     |

## Ada Boost

| hyper parameter |               |              | Regression result |                              |                     |                                |
|-----------------|---------------|--------------|-------------------|------------------------------|---------------------|--------------------------------|
| loss            | learning_rate | n_estimators | MSE<br>(training) | R <sup>2</sup><br>(training) | MSE<br>(validation) | R <sup>2</sup><br>(validation) |
| exponential     | 0.001         | 50           | 0.0128073         | 0.7734752                    | 0.0235366           | 0.5528765                      |
| exponential     | 0.001         | 100          | 0.012578          | 0.7774871                    | 0.0236956           | 0.5517866                      |
| exponential     | 0.001         | 150          | 0.0125845         | 0.7774758                    | 0.023575            | 0.5523912                      |
| exponential     | 0.01          | 50           | 0.0125959         | 0.7771389                    | 0.023451            | 0.5444425                      |
| exponential     | 0.01          | 100          | 0.0116067         | 0.7947896                    | 0.0238186           | 0.5478957                      |
| exponential     | 0.01          | 150          | 0.0112957         | 0.8002147                    | 0.0243393           | 0.5414988                      |
| exponential     | 0.1           | 50           | 0.0097695         | 0.8268483                    | 0.0253087           | 0.5333856                      |
| exponential     | 0.1           | 100          | 0.0074695         | 0.8680207                    | 0.0265683           | 0.5284115                      |
| exponential     | 0.1           | 150          | 0.0068324         | 0.8792013                    | 0.0269827           | 0.5199567                      |
| exponential     | 1             | 50           | 0.0059872         | 0.8945366                    | 0.0279726           | 0.5209833                      |
| exponential     | 1             | 100          | 0.0054484         | 0.9039119                    | 0.0279125           | 0.5181311                      |
| exponential     | 1             | 150          | 0.0052733         | 0.9069571                    | 0.0281329           | 0.5167544                      |
| linear          | 0.001         | 50           | 0.0127434         | 0.7745927                    | 0.024029            | 0.5474231                      |
| linear          | 0.001         | 100          | 0.0125119         | 0.7786686                    | 0.0235107           | 0.5540541                      |
| linear          | 0.001         | 150          | 0.0124667         | 0.7795665                    | 0.0235431           | 0.5521346                      |
| linear          | 0.01          | 50           | 0.0121262         | 0.7854384                    | 0.0239915           | 0.55049                        |
| linear          | 0.01          | 100          | 0.0114782         | 0.7969406                    | 0.0244402           | 0.5375357                      |
| linear          | 0.01          | 150          | 0.0111108         | 0.8034352                    | 0.0241377           | 0.5437199                      |
| linear          | 0.1           | 50           | 0.0088564         | 0.8435887                    | 0.0264506           | 0.5283151                      |
| linear          | 0.1           | 100          | 0.0071266         | 0.8739756                    | 0.0272125           | 0.5245813                      |
| linear          | 0.1           | 150          | 0.006376          | 0.8871389                    | 0.0280891           | 0.503078                       |
| linear          | 1             | 50           | 0.0058718         | 0.8962546                    | 0.0280578           | 0.491944                       |
| linear          | 1             | 100          | 0.0053679         | 0.9051528                    | 0.0281221           | 0.4916817                      |
| linear          | 1             | 150          | 0.0052153         | 0.9078432                    | 0.0274242           | 0.5078048                      |
| square          | 0.001         | 50           | 0.0127342         | 0.7746455                    | 0.0237136           | 0.5443726                      |
| square          | 0.001         | 100          | 0.0123474         | 0.7815                       | 0.0235682           | 0.5542917                      |
| square          | 0.001         | 150          | 0.01221           | 0.7839894                    | 0.0232305           | 0.5572812                      |
| <b>square</b>   | <b>0.01</b>   | <b>50</b>    | <b>0.012077</b>   | <b>0.786293</b>              | <b>0.023448</b>     | <b>0.557679</b>                |
| square          | 0.01          | 100          | 0.0112185         | 0.8019832                    | 0.0249577           | 0.5454058                      |
| square          | 0.01          | 150          | 0.0104369         | 0.8153431                    | 0.0250689           | 0.534722                       |
| square          | 0.1           | 50           | 0.0075749         | 0.8661449                    | 0.02627             | 0.52551                        |
| square          | 0.1           | 100          | 0.0063166         | 0.8883163                    | 0.0287999           | 0.5182371                      |

|        |     |     |           |           |           |           |
|--------|-----|-----|-----------|-----------|-----------|-----------|
| square | 0.1 | 150 | 0.0056404 | 0.9001498 | 0.0295952 | 0.5082768 |
| square | 1   | 50  | 0.005683  | 0.8988169 | 0.0270855 | 0.5151965 |
| square | 1   | 100 | 0.0051616 | 0.9086575 | 0.0277572 | 0.506882  |
| square | 1   | 150 | 0.0050632 | 0.9100322 | 0.026487  | 0.5076237 |

Gradient Boost

| hyper parameter |                   |              | Regression result |                   |                              |                     |                                |
|-----------------|-------------------|--------------|-------------------|-------------------|------------------------------|---------------------|--------------------------------|
| loss            | learning<br>_rate | n_estimators | sub<br>sample     | MSE<br>(training) | R <sup>2</sup><br>(training) | MSE<br>(validation) | R <sup>2</sup><br>(validation) |
| huber           | 0.001             | 50           | 0.4               | 0.053311          | 0.058174                     | 0.054439            | 0.017310                       |
| huber           | 0.001             | 50           | 0.7               | 0.052883          | 0.065717                     | 0.054256            | 0.020409                       |
| huber           | 0.001             | 50           | 1                 | 0.052697          | 0.069013                     | 0.054410            | 0.017722                       |
| huber           | 0.001             | 100          | 0.4               | 0.050190          | 0.113294                     | 0.052000            | 0.062458                       |
| huber           | 0.001             | 100          | 0.7               | 0.049398          | 0.127295                     | 0.051707            | 0.066920                       |
| huber           | 0.001             | 100          | 1                 | 0.049027          | 0.133727                     | 0.051704            | 0.064291                       |
| huber           | 0.001             | 150          | 0.4               | 0.047342          | 0.163626                     | 0.049746            | 0.103369                       |
| huber           | 0.001             | 150          | 0.7               | 0.046191          | 0.183956                     | 0.049261            | 0.111805                       |
| huber           | 0.001             | 150          | 1                 | 0.045719          | 0.192157                     | 0.049404            | 0.105973                       |
| huber           | 0.01              | 50           | 0.4               | 0.032212          | 0.430971                     | 0.038337            | 0.314208                       |
| huber           | 0.01              | 50           | 0.7               | 0.029849          | 0.472670                     | 0.037556            | 0.324575                       |
| huber           | 0.01              | 50           | 1                 | 0.029291          | 0.482231                     | 0.037934            | 0.315188                       |
| huber           | 0.01              | 100          | 0.4               | 0.020358          | 0.640373                     | 0.030726            | 0.454647                       |
| huber           | 0.01              | 100          | 0.7               | 0.017945          | 0.683205                     | 0.031089            | 0.456210                       |
| huber           | 0.01              | 100          | 1                 | 0.017754          | 0.685998                     | 0.030708            | 0.450484                       |
| huber           | 0.01              | 150          | 0.4               | 0.014248          | 0.748308                     | 0.027215            | 0.518115                       |
| huber           | 0.01              | 150          | 0.7               | 0.012072          | 0.786868                     | 0.028193            | 0.509172                       |
| huber           | 0.01              | 150          | 1                 | 0.011902          | 0.789493                     | 0.028043            | 0.490404                       |
| huber           | 0.1               | 50           | 0.4               | 0.003977          | 0.929837                     | 0.023603            | 0.575101                       |
| huber           | 0.1               | 50           | 0.7               | 0.002244          | 0.960401                     | 0.022259            | 0.557828                       |
| huber           | 0.1               | 50           | 1                 | 0.002406          | 0.957715                     | 0.025781            | 0.500116                       |
| huber           | 0.1               | 100          | 0.4               | 0.001106          | 0.980534                     | 0.025100            | 0.541436                       |
| huber           | 0.1               | 100          | 0.7               | 0.000535          | 0.990576                     | 0.024932            | 0.532744                       |
| huber           | 0.1               | 100          | 1                 | 0.000711          | 0.987397                     | 0.026240            | 0.512479                       |
| huber           | 0.1               | 150          | 0.4               | 0.000321          | 0.994340                     | 0.025672            | 0.519463                       |
| huber           | 0.1               | 150          | 0.7               | 0.000204          | 0.996397                     | 0.025087            | 0.531197                       |
| huber           | 0.1               | 150          | 1                 | 0.000296          | 0.994722                     | 0.025935            | 0.516588                       |

|            |            |            |            |                 |                 |                 |                 |
|------------|------------|------------|------------|-----------------|-----------------|-----------------|-----------------|
| huber      | 1          | 50         | 0.4        | 0.040513        | 0.248420        | 0.387526        | -7.198172       |
| huber      | 1          | 50         | 0.7        | 0.000031        | 0.999455        | 0.044250        | 0.076384        |
| huber      | 1          | 50         | 1          | 0.000028        | 0.999507        | 0.033296        | 0.318763        |
| huber      | 1          | 100        | 0.4        | 0.019056        | 0.657426        | 0.650754        | -13.809753      |
| huber      | 1          | 100        | 0.7        | 0.000007        | 0.999877        | 0.044542        | 0.065520        |
| huber      | 1          | 100        | 1          | 0.000008        | 0.999845        | 0.033602        | 0.312272        |
| huber      | 1          | 150        | 0.4        | 0.029667        | 0.473757        | 1.906096        | -34.783053      |
| huber      | 1          | 150        | 0.7        | 0.000001        | 0.999989        | 0.044537        | 0.065616        |
| huber      | 1          | 150        | 1          | 0.000000        | 1.000000        | 0.033602        | 0.312272        |
| lad        | 0.001      | 50         | 0.4        | 0.054446        | 0.038111        | 0.055445        | -0.000020       |
| lad        | 0.001      | 50         | 0.7        | 0.054161        | 0.043136        | 0.055288        | 0.002448        |
| lad        | 0.001      | 50         | 1          | 0.054053        | 0.044993        | 0.055202        | 0.003914        |
| lad        | 0.001      | 100        | 0.4        | 0.052316        | 0.075760        | 0.053800        | 0.030902        |
| lad        | 0.001      | 100        | 0.7        | 0.051705        | 0.086506        | 0.053529        | 0.035627        |
| lad        | 0.001      | 100        | 1          | 0.051473        | 0.090507        | 0.053425        | 0.037148        |
| lad        | 0.001      | 150        | 0.4        | 0.050416        | 0.109340        | 0.052393        | 0.057752        |
| lad        | 0.001      | 150        | 0.7        | 0.049408        | 0.127097        | 0.051828        | 0.067637        |
| lad        | 0.001      | 150        | 1          | 0.048885        | 0.135883        | 0.051613        | 0.070571        |
| lad        | 0.01       | 50         | 0.4        | 0.038820        | 0.314336        | 0.043932        | 0.217919        |
| lad        | 0.01       | 50         | 0.7        | 0.037073        | 0.344928        | 0.042985        | 0.245587        |
| lad        | 0.01       | 50         | 1          | 0.036161        | 0.360654        | 0.040753        | 0.262433        |
| lad        | 0.01       | 100        | 0.4        | 0.029283        | 0.482521        | 0.037421        | 0.349591        |
| lad        | 0.01       | 100        | 0.7        | 0.026977        | 0.523336        | 0.036009        | 0.373888        |
| lad        | 0.01       | 100        | 1          | 0.025627        | 0.546635        | 0.033565        | 0.382197        |
| lad        | 0.01       | 150        | 0.4        | 0.023788        | 0.579652        | 0.034230        | 0.408375        |
| lad        | 0.01       | 150        | 0.7        | 0.021119        | 0.626905        | 0.032366        | 0.431193        |
| lad        | 0.01       | 150        | 1          | 0.019945        | 0.647193        | 0.030345        | 0.434531        |
| lad        | 0.1        | 50         | 0.4        | 0.010361        | 0.816666        | 0.026610        | 0.537512        |
| lad        | 0.1        | 50         | 0.7        | 0.008650        | 0.847269        | 0.023951        | 0.579504        |
| lad        | 0.1        | 50         | 1          | 0.009760        | 0.827484        | 0.026450        | 0.533093        |
| lad        | 0.1        | 100        | 0.4        | 0.005623        | 0.900291        | 0.024893        | 0.550601        |
| <b>lad</b> | <b>0.1</b> | <b>100</b> | <b>0.7</b> | <b>0.004666</b> | <b>0.917573</b> | <b>0.023405</b> | <b>0.589600</b> |
| lad        | 0.1        | 100        | 1          | 0.006582        | 0.883732        | 0.024524        | 0.563759        |
| lad        | 0.1        | 150        | 0.4        | 0.003798        | 0.932661        | 0.024378        | 0.558372        |
| lad        | 0.1        | 150        | 0.7        | 0.003456        | 0.938948        | 0.023504        | 0.587246        |
| lad        | 0.1        | 150        | 1          | 0.005226        | 0.907716        | 0.024076        | 0.570612        |
| lad        | 1          | 50         | 0.4        | 0.037828        | 0.334296        | 0.170443        | -2.491508       |

|     |       |     |     |          |          |          |           |
|-----|-------|-----|-----|----------|----------|----------|-----------|
| lad | 1     | 50  | 0.7 | 0.001394 | 0.975414 | 0.044836 | 0.150390  |
| lad | 1     | 50  | 1   | 0.001564 | 0.972339 | 0.035230 | 0.258057  |
| lad | 1     | 100 | 0.4 | 0.019001 | 0.642944 | 0.320614 | -5.103614 |
| lad | 1     | 100 | 0.7 | 0.000891 | 0.984194 | 0.045288 | 0.145838  |
| lad | 1     | 100 | 1   | 0.000949 | 0.983450 | 0.033705 | 0.283919  |
| lad | 1     | 150 | 0.4 | 0.019965 | 0.625431 | 0.416251 | -6.174923 |
| lad | 1     | 150 | 0.7 | 0.000283 | 0.995037 | 0.046234 | 0.122259  |
| lad | 1     | 150 | 1   | 0.000853 | 0.985094 | 0.033707 | 0.283898  |
| ls  | 0.001 | 50  | 0.4 | 0.053219 | 0.059779 | 0.054381 | 0.019616  |
| ls  | 0.001 | 50  | 0.7 | 0.052776 | 0.067609 | 0.054231 | 0.021911  |
| ls  | 0.001 | 50  | 1   | 0.052595 | 0.070728 | 0.053949 | 0.020700  |
| ls  | 0.001 | 100 | 0.4 | 0.050124 | 0.114461 | 0.051961 | 0.064393  |
| ls  | 0.001 | 100 | 0.7 | 0.049302 | 0.128995 | 0.051709 | 0.067970  |
| ls  | 0.001 | 100 | 1   | 0.048961 | 0.134932 | 0.051386 | 0.066358  |
| ls  | 0.001 | 150 | 0.4 | 0.047310 | 0.164199 | 0.049755 | 0.104464  |
| ls  | 0.001 | 150 | 0.7 | 0.046102 | 0.185519 | 0.049303 | 0.112108  |
| ls  | 0.001 | 150 | 1   | 0.045656 | 0.193308 | 0.049116 | 0.105945  |
| ls  | 0.01  | 50  | 0.4 | 0.032162 | 0.431806 | 0.038664 | 0.310690  |
| ls  | 0.01  | 50  | 0.7 | 0.029852 | 0.472572 | 0.037255 | 0.316411  |
| ls  | 0.01  | 50  | 1   | 0.028921 | 0.489157 | 0.038800 | 0.326153  |
| ls  | 0.01  | 100 | 0.4 | 0.021013 | 0.628732 | 0.032046 | 0.449656  |
| ls  | 0.01  | 100 | 0.7 | 0.017621 | 0.688853 | 0.031030 | 0.459427  |
| ls  | 0.01  | 100 | 1   | 0.016418 | 0.709695 | 0.031048 | 0.448221  |
| ls  | 0.01  | 150 | 0.4 | 0.014606 | 0.741955 | 0.028961 | 0.508164  |
| ls  | 0.01  | 150 | 0.7 | 0.011481 | 0.797293 | 0.028139 | 0.506978  |
| ls  | 0.01  | 150 | 1   | 0.010334 | 0.817259 | 0.028044 | 0.484298  |
| ls  | 0.1   | 50  | 0.4 | 0.003225 | 0.943040 | 0.027453 | 0.535444  |
| ls  | 0.1   | 50  | 0.7 | 0.001768 | 0.968749 | 0.025197 | 0.550150  |
| ls  | 0.1   | 50  | 1   | 0.001475 | 0.973994 | 0.025486 | 0.525167  |
| ls  | 0.1   | 100 | 0.4 | 0.000809 | 0.985724 | 0.027704 | 0.527158  |
| ls  | 0.1   | 100 | 0.7 | 0.000260 | 0.995419 | 0.024103 | 0.550833  |
| ls  | 0.1   | 100 | 1   | 0.000250 | 0.995592 | 0.025167 | 0.528867  |
| ls  | 0.1   | 150 | 0.4 | 0.000252 | 0.995541 | 0.028083 | 0.523693  |
| ls  | 0.1   | 150 | 0.7 | 0.000051 | 0.999108 | 0.024436 | 0.544882  |
| ls  | 0.1   | 150 | 1   | 0.000051 | 0.999105 | 0.025443 | 0.522908  |
| ls  | 1     | 50  | 0.4 | 0.005735 | 0.897930 | 0.192536 | -2.871815 |
| ls  | 1     | 50  | 0.7 | 0.000000 | 0.999997 | 0.044318 | 0.219472  |



|          |       |     |     |          |           |          |           |
|----------|-------|-----|-----|----------|-----------|----------|-----------|
| ls       | 1     | 50  | 1   | 0.000000 | 1.000000  | 0.038446 | 0.262652  |
| ls       | 1     | 100 | 0.4 | 0.000772 | 0.986583  | 0.215188 | -3.311827 |
| ls       | 1     | 100 | 0.7 | 0.000000 | 1.000000  | 0.044305 | 0.219639  |
| ls       | 1     | 100 | 1   | 0.000000 | 1.000000  | 0.038446 | 0.262651  |
| ls       | 1     | 150 | 0.4 | 0.000255 | 0.995669  | 0.226206 | -3.588967 |
| ls       | 1     | 150 | 0.7 | 0.000000 | 1.000000  | 0.044305 | 0.219639  |
| ls       | 1     | 150 | 1   | 0.000000 | 1.000000  | 0.038446 | 0.262651  |
| quantile | 0.001 | 50  | 0.4 | 0.151229 | -1.671774 | 0.151878 | -1.795931 |
| quantile | 0.001 | 50  | 0.7 | 0.151154 | -1.670483 | 0.151938 | -1.796998 |
| quantile | 0.001 | 50  | 1   | 0.150867 | -1.665381 | 0.151996 | -1.798529 |
| quantile | 0.001 | 100 | 0.4 | 0.147007 | -1.597240 | 0.148013 | -1.722924 |
| quantile | 0.001 | 100 | 0.7 | 0.147046 | -1.597913 | 0.148267 | -1.727915 |
| quantile | 0.001 | 100 | 1   | 0.146393 | -1.586320 | 0.148269 | -1.728638 |
| quantile | 0.001 | 150 | 0.4 | 0.142911 | -1.524915 | 0.144205 | -1.651048 |
| quantile | 0.001 | 150 | 0.7 | 0.143190 | -1.529814 | 0.144880 | -1.664004 |
| quantile | 0.001 | 150 | 1   | 0.142246 | -1.513059 | 0.144762 | -1.662716 |
| quantile | 0.01  | 50  | 0.4 | 0.121599 | -1.148346 | 0.124337 | -1.275341 |
| quantile | 0.01  | 50  | 0.7 | 0.121590 | -1.148286 | 0.125460 | -1.298555 |
| quantile | 0.01  | 50  | 1   | 0.119527 | -1.111724 | 0.125743 | -1.305094 |
| quantile | 0.01  | 100 | 0.4 | 0.100653 | -0.778400 | 0.105631 | -0.926883 |
| quantile | 0.01  | 100 | 0.7 | 0.101293 | -0.789700 | 0.107981 | -0.970288 |
| quantile | 0.01  | 100 | 1   | 0.099231 | -0.752944 | 0.108667 | -0.985331 |
| quantile | 0.01  | 150 | 0.4 | 0.085740 | -0.514921 | 0.092269 | -0.678438 |
| quantile | 0.01  | 150 | 0.7 | 0.087217 | -0.541710 | 0.095571 | -0.755262 |
| quantile | 0.01  | 150 | 1   | 0.086643 | -0.530655 | 0.098580 | -0.793263 |
| quantile | 0.1   | 50  | 0.4 | 0.048395 | 0.143895  | 0.060823 | -0.095065 |
| quantile | 0.1   | 50  | 0.7 | 0.055950 | 0.009540  | 0.071365 | -0.328745 |
| quantile | 0.1   | 50  | 1   | 0.061365 | -0.085617 | 0.073400 | -0.428200 |
| quantile | 0.1   | 100 | 0.4 | 0.034664 | 0.386122  | 0.046103 | 0.121433  |
| quantile | 0.1   | 100 | 0.7 | 0.043651 | 0.228280  | 0.061017 | -0.136535 |
| quantile | 0.1   | 100 | 1   | 0.056294 | 0.002713  | 0.067978 | -0.316414 |
| quantile | 0.1   | 150 | 0.4 | 0.023783 | 0.579283  | 0.038511 | 0.228323  |
| quantile | 0.1   | 150 | 0.7 | 0.038068 | 0.326463  | 0.056744 | -0.040353 |
| quantile | 0.1   | 150 | 1   | 0.054010 | 0.042992  | 0.066355 | -0.289750 |
| quantile | 1     | 50  | 0.4 | 0.054811 | 0.032305  | 0.077344 | -0.696832 |
| quantile | 1     | 50  | 0.7 | 0.027925 | 0.504773  | 0.058226 | -0.199228 |
| quantile | 1     | 50  | 1   | 0.031446 | 0.441604  | 0.062035 | -0.227860 |

|          |   |     |     |          |           |          |           |
|----------|---|-----|-----|----------|-----------|----------|-----------|
| quantile | 1 | 100 | 0.4 | 0.057434 | -0.031394 | 0.085030 | -0.894807 |
| quantile | 1 | 100 | 0.7 | 0.015643 | 0.721964  | 0.062309 | -0.527011 |
| quantile | 1 | 100 | 1   | 0.021433 | 0.618733  | 0.066064 | -0.277720 |
| quantile | 1 | 150 | 0.4 | 0.060431 | -0.068258 | 0.093435 | -0.807615 |
| quantile | 1 | 150 | 0.7 | 0.012271 | 0.783897  | 0.074433 | -0.654087 |
| quantile | 1 | 150 | 1   | 0.018333 | 0.674424  | 0.066838 | -0.266111 |

XG Boost

| hyper parameter |            |           | Regression result |                           |                  |                             |
|-----------------|------------|-----------|-------------------|---------------------------|------------------|-----------------------------|
| learning_rate   | sub sample | max_depth | MSE (training)    | R <sup>2</sup> (training) | MSE (validation) | R <sup>2</sup> (validation) |
| 0.001           | 0.4        | 4         | 0.05147215        | 0.090660167               | 5.28E-02         | 0.04957626                  |
| 0.001           | 0.4        | 6         | 0.05138633        | 0.092172567               | 5.28E-02         | 0.04987045                  |
| 0.001           | 0.4        | 8         | 0.05138557        | 0.092188211               | 5.28E-02         | 0.04994082                  |
| 0.001           | 0.7        | 4         | 0.05000295        | 0.116604585               | 5.22E-02         | 0.06041824                  |
| 0.001           | 0.7        | 6         | 0.04965833        | 0.122693                  | 5.22E-02         | 0.06061206                  |
| 0.001           | 0.7        | 8         | 0.04960454        | 0.123641752               | 5.22E-02         | 0.06073516                  |
| 0.001           | 1          | 4         | 0.04933414        | 0.128241282               | 5.18E-02         | 0.05742117                  |
| 0.001           | 1          | 6         | 0.04866122        | 0.140159184               | 5.16E-02         | 0.05973683                  |
| 0.001           | 1          | 8         | 0.04850253        | 0.142961426               | 5.15E-02         | 0.06064209                  |
| 0.01            | 0.4        | 4         | 0.02418521        | 0.572746794               | 3.40E-02         | 0.39816787                  |
| 0.01            | 0.4        | 6         | 0.02366603        | 0.58193711                | 3.37E-02         | 0.40325634                  |
| 0.01            | 0.4        | 8         | 0.0236438         | 0.582320553               | 3.36E-02         | 0.40425332                  |
| 0.01            | 0.7        | 4         | 0.01819029        | 0.678263398               | 3.13E-02         | 0.42528324                  |
| 0.01            | 0.7        | 6         | 0.01632819        | 0.711258396               | 3.11E-02         | 0.42980245                  |
| 0.01            | 0.7        | 8         | 0.01601635        | 0.716784201               | 0.031198937      | 0.42767226                  |
| 0.01            | 1          | 4         | 0.01556133        | 0.724668301               | 0.03276885       | 0.40636608                  |
| 0.01            | 1          | 6         | 0.01281377        | 0.773446077               | 0.034293786      | 0.40917066                  |
| 0.01            | 1          | 8         | 0.01226617        | 0.783230033               | 0.035385954      | 0.39513923                  |
| <b>0.1</b>      | <b>0.4</b> | <b>4</b>  | <b>0.0009681</b>  | <b>0.9828959</b>          | <b>0.0265561</b> | <b>0.5288735</b>            |
| 0.1             | 0.4        | 6         | 0.00082428        | 0.985384681               | 0.02661654       | 0.52584901                  |
| 0.1             | 0.4        | 8         | 0.00069344        | 0.987747978               | 0.027590032      | 0.50373683                  |
| 0.1             | 0.7        | 4         | 0.00013889        | 0.997541748               | 0.027516305      | 0.49826606                  |
| 0.1             | 0.7        | 6         | 2.08E-05          | 0.999631675               | 0.027406935      | 0.48284666                  |
| 0.1             | 0.7        | 8         | 1.10E-05          | 0.999806257               | 0.026204192      | 0.50147677                  |
| 0.1             | 1          | 4         | 8.43E-05          | 0.998517036               | 0.031750354      | 0.456443                    |
| 0.1             | 1          | 6         | 1.68E-06          | 0.999969938               | 0.029610079      | 0.41672305                  |

|     |     |   |          |             |             |            |
|-----|-----|---|----------|-------------|-------------|------------|
| 0.1 | 1   | 8 | 5.49E-07 | 0.999990216 | 0.030357139 | 0.39421961 |
| 1   | 0.4 | 4 | 4.01E-06 | 0.999928988 | 0.062869034 | -0.2468915 |
| 1   | 0.4 | 6 | 1.10E-06 | 0.999980459 | 0.054771074 | -0.1998166 |
| 1   | 0.4 | 8 | 1.25E-06 | 0.999977994 | 0.043820433 | -0.0381041 |
| 1   | 0.7 | 4 | 1.14E-07 | 0.999997963 | 0.03121231  | 0.31103509 |
| 1   | 0.7 | 6 | 1.04E-07 | 0.999998148 | 0.028896427 | 0.37041169 |
| 1   | 0.7 | 8 | 1.04E-07 | 0.999998164 | 0.037201529 | 0.26491071 |
| 1   | 1   | 4 | 2.53E-07 | 0.999995557 | 0.029842835 | 0.40073018 |
| 1   | 1   | 6 | 2.12E-07 | 0.999996247 | 0.033354248 | 0.33005985 |
| 1   | 1   | 8 | 1.79E-07 | 0.999996817 | 0.031678236 | 0.35431096 |

SVR

| hyper parameter |       |        |     |                  | Regression result |                              |                     |                                |
|-----------------|-------|--------|-----|------------------|-------------------|------------------------------|---------------------|--------------------------------|
| kernel          | C     | degree | nu  | length<br>_scale | MSE<br>(training) | R <sup>2</sup><br>(training) | MSE<br>(validation) | R <sup>2</sup><br>(validation) |
| matern          | 0.001 | x      | 0.5 | 1                | 0.0563258         | 0.004648                     | 0.05698656          | -0.0333315                     |
| matern          | 0.001 | x      | 0.5 | 10               | 0.0567224         | -0.002367                    | 0.05717137          | -0.0368998                     |
| matern          | 0.001 | x      | 0.5 | 100              | 0.0568435         | -0.004508                    | 0.05724033          | -0.0381642                     |
| matern          | 0.001 | x      | 1.5 | 1                | 0.0562376         | 0.006205                     | 0.05689147          | -0.0316411                     |
| matern          | 0.001 | x      | 1.5 | 10               | 0.0568154         | -0.004011                    | 0.05722218          | -0.0378316                     |
| matern          | 0.001 | x      | 1.5 | 100              | 0.0568581         | -0.004767                    | 0.05724873          | -0.0383183                     |
| matern          | 0.001 | x      | 2.5 | 1                | 0.056209          | 0.006709                     | 0.05686163          | -0.031128                      |
| matern          | 0.001 | x      | 2.5 | 10               | 0.0568293         | -0.004257                    | 0.05723084          | -0.0379896                     |
| matern          | 0.001 | x      | 2.5 | 100              | 0.0568584         | -0.004771                    | 0.05724888          | -0.0383209                     |
| matern          | 0.01  | x      | 0.5 | 1                | 0.0519637         | 0.081806                     | 0.05479188          | 0.0097059                      |
| matern          | 0.01  | x      | 0.5 | 10               | 0.0555133         | 0.019007                     | 0.05646303          | -0.0235447                     |
| matern          | 0.01  | x      | 0.5 | 100              | 0.056707          | -0.002096                    | 0.05716189          | -0.0367257                     |
| matern          | 0.01  | x      | 1.5 | 1                | 0.0512979         | 0.093824                     | 0.05403078          | 0.027884                       |
| matern          | 0.01  | x      | 1.5 | 10               | 0.0564276         | 0.00284                      | 0.05697638          | -0.0332981                     |
| matern          | 0.01  | x      | 1.5 | 100              | 0.0568533         | -0.004681                    | 0.05724573          | -0.038263                      |
| matern          | 0.01  | x      | 2.5 | 1                | 0.0510771         | 0.097734                     | 0.05373051          | 0.03349901                     |
| matern          | 0.01  | x      | 2.5 | 10               | 0.0565653         | 0.000406                     | 0.05706543          | -0.0349575                     |
| matern          | 0.01  | x      | 2.5 | 100              | 0.0568556         | -0.004722                    | 0.05724717          | -0.0382894                     |
| matern          | 0.1   | x      | 0.5 | 1                | 0.0267197         | 0.528186                     | 0.04171525          | 0.2584265                      |
| matern          | 0.1   | x      | 0.5 | 10               | 0.0457843         | 0.191304                     | 0.04996154          | 0.10294563                     |
| matern          | 0.1   | x      | 0.5 | 100              | 0.0553649         | 0.02163                      | 0.05636011          | -0.0214527                     |
| matern          | 0.1   | x      | 1.5 | 1                | 0.0257019         | 0.546126                     | 0.03799745          | 0.32616166                     |

|               |          |          |          |          |                 |                |                  |                  |
|---------------|----------|----------|----------|----------|-----------------|----------------|------------------|------------------|
| matern        | 0.1      | x        | 1.5      | 10       | 0.0528141       | 0.066697       | 0.05429453       | 0.01996075       |
| matern        | 0.1      | x        | 1.5      | 100      | 0.0568046       | -0.003821      | 0.05721569       | -0.0377107       |
| matern        | 0.1      | x        | 2.5      | 1        | 0.0256927       | 0.54625        | 0.03719137       | 0.3406822        |
| matern        | 0.1      | x        | 2.5      | 10       | 0.0540495       | 0.044863       | 0.05522418       | 0.00136402       |
| matern        | 0.1      | x        | 2.5      | 100      | 0.0568279       | -0.004232      | 0.05723007       | -0.037975        |
| matern        | 1        | x        | 0.5      | 1        | 0.0068105       | 0.879344       | 0.03145867       | 0.42762708       |
| matern        | 1        | x        | 0.5      | 10       | 0.015221        | 0.731252       | 0.03079637       | 0.47107006       |
| matern        | 1        | x        | 0.5      | 100      | 0.0448185       | 0.208383       | 0.04912426       | 0.11827902       |
| matern        | 1        | x        | 1.5      | 1        | 0.0066627       | 0.881965       | 0.02792119       | 0.49599562       |
| matern        | 1        | x        | 1.5      | 10       | 0.0340022       | 0.399421       | 0.03824465       | 0.31972809       |
| matern        | 1        | x        | 1.5      | 100      | 0.0563212       | 0.004721       | 0.0569092        | -0.0320442       |
| matern        | 1        | x        | 2.5      | 1        | 0.0065785       | 0.883472       | 0.02748523       | 0.50402411       |
| matern        | 1        | x        | 2.5      | 10       | 0.0389892       | 0.3113         | 0.0419866        | 0.24979956       |
| matern        | 1        | x        | 2.5      | 100      | 0.0565518       | 0.000645       | 0.05705738       | -0.0348051       |
| linear        | 0.001    | x        | x        | x        | 0.0550559       | 0.027083       | 0.05600101       | -0.014311        |
| linear        | 0.01     | x        | x        | x        | 0.0433934       | 0.233021       | 0.04603792       | 0.1764199        |
| linear        | 0.1      | x        | x        | x        | 0.019265        | 0.659625       | 0.02503753       | 0.5578633        |
| <b>linear</b> | <b>1</b> | <b>x</b> | <b>x</b> | <b>x</b> | <b>0.013179</b> | <b>0.76722</b> | <b>0.0200605</b> | <b>0.6297952</b> |
| poly          | 0.001    | 2        | x        | x        | 0.0371927       | 0.343042       | 0.04110684       | 0.26587554       |
| poly          | 0.001    | 3        | x        | x        | 0.0313702       | 0.445946       | 0.03646319       | 0.35170277       |
| poly          | 0.001    | 4        | x        | x        | 0.0272819       | 0.518071       | 0.03297553       | 0.41748968       |
| poly          | 0.01     | 2        | x        | x        | 0.0149733       | 0.73561        | 0.02429391       | 0.56729902       |
| poly          | 0.01     | 3        | x        | x        | 0.0134429       | 0.762363       | 0.02170956       | 0.58155115       |
| poly          | 0.01     | 4        | x        | x        | 0.0124474       | 0.779996       | 0.02260336       | 0.58829283       |
| poly          | 0.1      | 2        | x        | x        | 0.0081319       | 0.856208       | 0.02370681       | 0.53402042       |
| poly          | 0.1      | 3        | x        | x        | 0.0077095       | 0.863627       | 0.02530719       | 0.49770565       |
| poly          | 0.1      | 4        | x        | x        | 0.0073691       | 0.869591       | 0.02615543       | 0.48021836       |
| poly          | 1        | 2        | x        | x        | 0.0069863       | 0.876256       | 0.02615785       | 0.48913085       |
| poly          | 1        | 3        | x        | x        | 0.0069871       | 0.876234       | 0.02664776       | 0.47411996       |
| poly          | 1        | 4        | x        | x        | 0.0070019       | 0.875971       | 0.02720345       | 0.45859991       |
| rbf           | 0.001    | x        | x        | x        | 0.0562069       | 0.006744       | 0.05683144       | -0.0306358       |
| rbf           | 0.01     | x        | x        | x        | 0.0510642       | 0.097963       | 0.05334833       | 0.04015558       |
| rbf           | 0.1      | x        | x        | x        | 0.0274863       | 0.514472       | 0.03590628       | 0.36360126       |
| rbf           | 1        | x        | x        | x        | 0.0089311       | 0.842244       | 0.02828517       | 0.53111811       |
| sigmoid       | 0.001    | x        | x        | x        | 0.0568022       | -0.003779      | 0.05720824       | -0.037544        |
| sigmoid       | 0.01     | x        | x        | x        | 0.0562973       | 0.005133       | 0.05683757       | -0.0305709       |
| sigmoid       | 0.1      | x        | x        | x        | 0.0520108       | 0.081212       | 0.05340705       | 0.03788294       |

|         |   |   |   |   |           |          |            |            |
|---------|---|---|---|---|-----------|----------|------------|------------|
| sigmoid | 1 | x | x | x | 0.0353527 | 0.375336 | 0.03583478 | 0.35406766 |
|---------|---|---|---|---|-----------|----------|------------|------------|

KNN

| hyper parameter |             |          | Regression result |                           |                  |                             |
|-----------------|-------------|----------|-------------------|---------------------------|------------------|-----------------------------|
| weights         | n_neighbors | p        | MSE (training)    | R <sup>2</sup> (training) | MSE (validation) | R <sup>2</sup> (validation) |
| <b>distance</b> | <b>3</b>    | <b>1</b> | <b>0</b>          | <b>1</b>                  | <b>0.026756</b>  | <b>0.4846771</b>            |
| distance        | 3           | 2        | 0                 | 1                         | 0.03257736       | 0.38918737                  |
| distance        | 5           | 1        | 0                 | 1                         | 0.03054621       | 0.42041944                  |
| distance        | 5           | 2        | 0                 | 1                         | 0.0350297        | 0.3539005                   |
| distance        | 7           | 1        | 0                 | 1                         | 0.03185241       | 0.39410981                  |
| distance        | 7           | 2        | 0                 | 1                         | 0.03588907       | 0.33130834                  |
| distance        | 11          | 1        | 0                 | 1                         | 0.03203239       | 0.39135899                  |
| distance        | 11          | 2        | 0                 | 1                         | 0.03833145       | 0.3241954                   |
| distance        | 13          | 1        | 0                 | 1                         | 0.03309077       | 0.3681066                   |
| distance        | 13          | 2        | 0                 | 1                         | 0.04029236       | 0.28508985                  |
| uniform         | 3           | 1        | 0.018204          | 0.678183                  | 0.03301956       | 0.39843033                  |
| uniform         | 3           | 2        | 0.021632          | 0.617805                  | 0.03479548       | 0.34358904                  |
| uniform         | 5           | 1        | 0.025729          | 0.545474                  | 0.03827157       | 0.31525843                  |
| uniform         | 5           | 2        | 0.026497          | 0.532133                  | 0.04076233       | 0.27938469                  |
| uniform         | 7           | 1        | 0.030515          | 0.461096                  | 0.03747982       | 0.27246362                  |
| uniform         | 7           | 2        | 0.032854          | 0.41948                   | 0.03949741       | 0.25928803                  |
| uniform         | 11          | 1        | 0.034607          | 0.388084                  | 0.03590689       | 0.3034686                   |
| uniform         | 11          | 2        | 0.036151          | 0.361668                  | 0.04109869       | 0.27080928                  |
| uniform         | 13          | 1        | 0.034865          | 0.384298                  | 0.03973342       | 0.2929247                   |
| uniform         | 13          | 2        | 0.037813          | 0.332311                  | 0.04338325       | 0.22462803                  |

PLS

| hyper parameter |                    | Regression result         |                   |                             |
|-----------------|--------------------|---------------------------|-------------------|-----------------------------|
| n_components    | MSE (training)     | R <sup>2</sup> (training) | MSE (validation)  | R <sup>2</sup> (validation) |
| <b>1</b>        | <b>0.026005648</b> | <b>0.539848061</b>        | <b>0.03131058</b> | <b>0.400998887</b>          |

GPR

| hyper parameter |    |       | Regression result |                |     |                |
|-----------------|----|-------|-------------------|----------------|-----|----------------|
| length_scale    | nu | alpha | MSE               | R <sup>2</sup> | MSE | R <sup>2</sup> |

|           |            |                 | (training)      | (training) | (validation)     | (validation)     |
|-----------|------------|-----------------|-----------------|------------|------------------|------------------|
| 1         | 0.5        | 1.E-01          | 0.03834         | 0.322265   | 0.04508879       | 0.19790608       |
| 1         | 1.5        | 1.E-01          | 0.028938        | 0.488482   | 0.03492742       | 0.38241803       |
| 1         | 2.5        | 1.E-01          | 0.027831        | 0.507454   | 0.03337375       | 0.40758218       |
| 10        | 0.5        | 1.E-01          | 0.03834         | 0.322272   | 0.04508853       | 0.1979117        |
| 10        | 1.5        | 1.E-01          | 0.028938        | 0.48848    | 0.03492757       | 0.3824165        |
| 10        | 2.5        | 1.E-01          | 0.027831        | 0.507457   | 0.0333736        | 0.40758438       |
| 100       | 0.5        | 1.E-01          | 0.03834         | 0.322263   | 0.04508888       | 0.19790335       |
| 100       | 1.5        | 1.E-01          | 0.028938        | 0.488477   | 0.03492766       | 0.38241386       |
| 100       | 2.5        | 1.E-01          | 0.027831        | 0.507452   | 0.03337386       | 0.40758043       |
| 1         | 0.5        | 1.00E-04        | 6.37E-07        | 0.999989   | 0.02321487       | 0.6157695        |
| 1         | 1.5        | 1.00E-04        | 1.53E-05        | 0.99973    | 0.02860897       | 0.50526657       |
| 1         | 2.5        | 1.00E-04        | 2.41E-05        | 0.999573   | 0.03163394       | 0.43355762       |
| 10        | 0.5        | 1.00E-04        | 6.38E-07        | 0.999989   | 0.02321486       | 0.61577013       |
| 10        | 1.5        | 1.00E-04        | 1.53E-05        | 0.99973    | 0.02860914       | 0.50526491       |
| 10        | 2.5        | 1.00E-04        | 3.13E-08        | 0.999999   | 0.32026683       | -4.9897995       |
| 100       | 0.5        | 1.00E-04        | 6.37E-07        | 0.999989   | 0.02321487       | 0.61576938       |
| 100       | 1.5        | 1.00E-04        | 3.13E-08        | 0.999999   | 0.32026683       | -4.9897995       |
| 100       | 2.5        | 1.00E-04        | 3.13E-08        | 0.999999   | 0.32026683       | -4.9897995       |
| 1         | 0.5        | 1.00E-07        | 6.68E-13        | 1          | 0.02321579       | 0.61591483       |
| 1         | 1.5        | 1.00E-07        | 1.43E-11        | 1          | 0.03154317       | 0.42880763       |
| 1         | 2.5        | 1.00E-07        | 2.10E-11        | 1          | 0.038532         | 0.28198275       |
| 10        | 0.5        | 1.00E-07        | 6.68E-13        | 1          | 0.02321577       | 0.61591525       |
| 10        | 1.5        | 1.00E-07        | 3.13E-13        | 1          | 0.25785546       | -3.4956761       |
| 10        | 2.5        | 1.00E-07        | 3.13E-14        | 1          | 0.32026683       | -4.9897995       |
| 100       | 0.5        | 1.00E-07        | 6.68E-13        | 1          | 0.02321583       | 0.61591401       |
| 100       | 1.5        | 1.00E-07        | 3.13E-14        | 1          | 0.32026683       | -4.9897995       |
| 100       | 2.5        | 1.00E-07        | 3.13E-14        | 1          | 0.32026683       | -4.9897995       |
| 1         | 0.5        | 1.00E-10        | 6.68E-19        | 1          | 0.02321581       | 0.61591458       |
| 1         | 1.5        | 1.00E-10        | 1.43E-17        | 1          | 0.03154836       | 0.42867936       |
| 1         | 2.5        | 1.00E-10        | 2.10E-17        | 1          | 0.03853954       | 0.28185604       |
| <b>10</b> | <b>0.5</b> | <b>1.00E-10</b> | <b>6.68E-19</b> | <b>1</b>   | <b>0.0232143</b> | <b>0.6159353</b> |
| 10        | 1.5        | 1.00E-10        | 3.13E-19        | 1          | 0.25785548       | -3.4956784       |
| 10        | 2.5        | 1.00E-10        | 3.13E-20        | 1          | 0.32026683       | -4.9897995       |
| 100       | 0.5        | 1.00E-10        | 6.68E-19        | 1          | 0.02321583       | 0.61591411       |
| 100       | 1.5        | 1.00E-10        | 3.13E-20        | 1          | 0.32026683       | -4.9897995       |
| 100       | 2.5        | 1.00E-10        | 3.13E-20        | 1          | 0.32026683       | -4.9897995       |

**Table S3.** 29 descriptors and their evaluation results for 91 different Eu<sup>2+</sup>-activated phosphors.

| num | Phosphor                                                                                                | Space group number                                     | Activator site multiplicity | Activator site symmetry | a/c  | b/c  | beta        | gamma | Volume      | Density | CN for A---X | CN for A---A | CN for A---B | CN for A---C | Avg. D A---X | Avg. D A---A | Avg. D A---B | Avg. D A---C | IR of X | IR of A | IR of B | IR of C | Atom N X | Atom N A | Atom N B | Atom N C | Electro negativity X | Electro negativity A | Electro negativity B | Electro negativity C | PEW (eV) | EBEG (eV) | Eg (eV) |
|-----|---------------------------------------------------------------------------------------------------------|--------------------------------------------------------|-----------------------------|-------------------------|------|------|-------------|-------|-------------|---------|--------------|--------------|--------------|--------------|--------------|--------------|--------------|--------------|---------|---------|---------|---------|----------|----------|----------|----------|----------------------|----------------------|----------------------|----------------------|----------|-----------|---------|
| 1   | Na <sub>2</sub> BaSi <sub>2</sub> O <sub>6</sub>                                                        | 4 ( <i>P2<sub>1</sub></i> )                            | 2                           | 1 (1)                   | 0.42 | 0.50 | 91.42       | 90    | 308.53      | 3.61    | 8            | 4            | 3            | 7            | 0.3528       | 0.2317       | 0.2609       | 0.2607       | 1.38    | 1.42    | 1.0133  | 0.26    | 8        | 56       | 11       | 14       | 3.44                 | 0.89                 | 0.93                 | 1.9                  | 2.49     | 2.73      | 4.17    |
| 2   | BaSi <sub>7</sub> N <sub>10</sub>                                                                       | 7 ( <i>Pc</i> )                                        | 2                           | 1 (1)                   | 0.70 | 0.71 | 106.25<br>6 | 90    | 425.38      | 3.7006  | 13           | 2            | 0            | 20           | 0.3059       | 0.2001       | 0.0000       | 0.2527       | 1.46    | 1.61    | 0       | 0.26    | 7        | 56       | 0        | 14       | 3.04                 | 0.89                 | 0                    | 1.9                  | 2.61     | 3.47      | 3.91    |
| 3   | SrSiN <sub>2</sub>                                                                                      | 14 ( <i>P2<sub>1</sub>/c</i> )                         | 4                           | 1 (1)                   | 0.75 | 0.82 | 113.51<br>8 | 90    | 221.014     | 4.319   | 9            | 7            | 0            | 6            | 0.3442       | 0.2654       | 0.0000       | 0.2998       | 1.46    | 1.31    | 0       | 0.26    | 7        | 38       | 0        | 14       | 3.04                 | 0.95                 | 0                    | 1.9                  | 1.84     | 2.09      | 2.98    |
| 4   | MgAl(PO <sub>4</sub> )O                                                                                 | 14 ( <i>P2<sub>1</sub>/c</i> )                         | 4                           | 1 (1)                   | 0.53 | 0.69 | 98.38       | 90    | 397.655814  | 2.71    | 5            | 3            | 0            | 6            | 0.4855       | 0.2925       | 0.0000       | 0.3119       | 1.38    | 0.66    | 0       | 0.243   | 8        | 12       | 0        | 14.3333  | 3.44                 | 1.31                 | 0                    | 1.9966               | 2.77     | 2.98      | 4.98    |
| 5   | SrZnP <sub>2</sub> O <sub>7</sub>                                                                       | 14 ( <i>P2<sub>1</sub>/c</i> )                         | 4                           | 1 (1)                   | 0.42 | 0.64 | 90.157<br>3 | 90    | 555.39      | 3.909   | 8            | 2            | 5            | 8            | 0.3815       | 0.2386       | 0.2533       | 0.2667       | 1.38    | 1.26    | 0.68    | 0.17    | 8        | 38       | 30       | 15       | 3.44                 | 0.95                 | 1.65                 | 2.19                 | 2.95     | 4.40      | 4.45    |
| 6   | BaAl <sub>2</sub> Si <sub>2</sub> O <sub>8</sub>                                                        | 15 ( <i>C2/c</i> )                                     | 8                           | 1 (1)                   | 0.60 | 0.91 | 115.02<br>1 | 90    | 1468.049    | 3.349   | 10           | 3            | 0            | 12           | 0.3374       | 0.2094       | 0.0000       | 0.2581       | 1.38    | 1.52    | 0       | 0.325   | 8        | 56       | 0        | 13.5     | 3.44                 | 0.89                 | 0                    | 1.755                | 2.83     | 3.20      | 4.77    |
| 7   | BaAl <sub>2</sub> Si <sub>2</sub> O <sub>8</sub>                                                        | 15 ( <i>C2/c</i> )                                     | 8                           | 1 (1)                   | 0.60 | 0.90 | 115.10<br>9 | 90    | 1638.87736  | 3.04    | 10           | 3            | 0            | 12           | 0.3368       | 0.2093       | 0.0000       | 0.2579       | 1.38    | 1.52    | 0       | 0.325   | 8        | 56       | 0        | 13.5     | 3.44                 | 0.89                 | 0                    | 1                    | 2.79     | 3.21      | 4.78    |
| 8   | CaAl <sub>4</sub> O <sub>7</sub>                                                                        | 15 ( <i>C2/c</i> )                                     | 4                           | 3 (2)                   | 0.42 | 0.69 | 106.75      | 90    | 595.08      | 2.9     | 7            | 2            | 0            | 12           | 0.3977       | 0.2301       | 0.0000       | 0.2788       | 1.38    | 1.06    | 0       | 0.39    | 8        | 20       | 0        | 13       | 3.44                 | 1                    | 0                    | 1.755                | 2.82     | 3.19      | 4.00    |
| 9   | Ba <sub>2</sub> ZnSi <sub>2</sub> O <sub>7</sub>                                                        | 15 ( <i>C2/c</i> )                                     | 8                           | 1 (1)                   | 0.79 | 0.79 | 111.3       | 90    | 710.75      | 4.75    | 8            | 6            | 0            | 10           | 0.3556       | 0.2303       | 0.0000       | 0.2624       | 1.38    | 1.42    | 0       | 0.396   | 8        | 56       | 0        | 19.3333  | 3.44                 | 0.89                 | 0                    | 1.8166               | 2.47     | 2.73      | 4.00    |
| 10  | CaMgSi <sub>2</sub> O <sub>6</sub>                                                                      | 15 ( <i>C2/c</i> )                                     | 4                           | 3 (2)                   | 0.54 | 0.92 | 105.87      | 90    | 439.89      | 3.27    | 8            | 2            | 0            | 11           | 0.4007       | 0.2258       | 0.0000       | 0.2962       | 1.38    | 1.12    | 0       | 0.3445  | 8        | 20       | 0        | 12.6667  | 3.44                 | 1                    | 0                    | 1.51                 | 2.77     | 3.03      | 4.95    |
| 11  | BaMg <sub>2</sub> Si <sub>2</sub> O <sub>7</sub>                                                        | 15 ( <i>C2/c</i> )                                     | 8                           | 1 (1)                   | 0.53 | 0.92 | 90.210<br>7 | 90    | 1266.44     | 3.71    | 9            | 2            | 0            | 17           | 0.3397       | 0.2218       | 0.0000       | 0.2500       | 1.38    | 1.47    | 0       | 0.4059  | 8        | 56       | 0        | 12.5     | 3.44                 | 0.89                 | 0                    | 1.46                 | 3.08     | 2.96      | 4.56    |
| 12  | Ba <sub>2</sub> MgSi <sub>2</sub> O <sub>7</sub>                                                        | 15 ( <i>C2/c</i> )                                     | 8                           | 1 (1)                   | 0.79 | 0.79 | 110.77      | 90    | 712.87      | 4.35    | 8            | 6            | 0            | 10           | 0.3549       | 0.2297       | 0.0000       | 0.2624       | 1.38    | 1.42    | 0       | 0.384   | 8        | 56       | 0        | 13.3333  | 3.44                 | 0.89                 | 0                    | 1.7033               | 2.46     | 2.71      | 4.45    |
| 13  | SrSiAl <sub>2</sub> O <sub>3</sub> N <sub>2</sub>                                                       | 19 ( <i>P2<sub>1</sub>2<sub>1</sub>2<sub>1</sub></i> ) | 4                           | 1 (1)                   | 0.43 | 0.70 | 90          | 90    | 450.715     | 3.6206  | 9            | 4            | 0            | 14           | 0.3495       | 0.2149       | 0.0000       | 0.2775       | 1.4066  | 1.31    | 0       | 0.3436  | 7.6667   | 38       | 0        | 13.3571  | 3.3066               | 0.95                 | 0                    | 1.7135               | 2.55     | 2.70      | 3.72    |
| 14  | BaSiAl <sub>2</sub> O <sub>3</sub> N <sub>2</sub>                                                       | 19 ( <i>P2<sub>1</sub>2<sub>1</sub>2<sub>1</sub></i> ) | 4                           | 1 (1)                   | 0.43 | 0.69 | 90          | 90    | 473.9988    | 4.1393  | 9            | 4            | 0            | 14           | 0.3410       | 0.2101       | 0.0000       | 0.2707       | 1.4066  | 1.47    | 0       | 0.3436  | 7.6667   | 56       | 0        | 13.3571  | 3.3066               | 0.89                 | 0                    | 1.7135               | 2.48     | 2.63      | 3.71    |
| 15  | Li <sub>2</sub> BaSiO <sub>4</sub>                                                                      | 185 ( <i>P6<sub>3</sub>sym</i> )                       | 6                           | 4 (m)                   | 0.76 | 0.76 | 90          | 120   | 602.8683    | 4.02    | 9            | 4            | 0            | 13           | 0.3423       | 0.2397       | 0.0000       | 0.2778       | 1.38    | 1.47    | 0       | 0.4631  | 8        | 56       | 0        | 6.6667   | 3.44                 | 0.89                 | 0                    | 1.2866               | 2.44     | 2.64      | 4.39    |
| 16  | LiSiON                                                                                                  | 29 ( <i>Pca2<sub>1</sub></i> )                         | 4                           | 1 (1)                   | 0.74 | 0.81 | 90          | 90    | 157.4       | 2.743   | 4            | 6            | 0            | 6            | 0.4900       | 0.3383       | 0.0000       | 0.3210       | 1.4     | 0.59    | 0       | 0.26    | 7.75     | 3        | 0        | 14       | 3.34                 | 0.98                 | 0                    | 1.9                  | 2.59     | 3.12      | 5.30    |
| 17  | CaAlSiN <sub>3</sub>                                                                                    | 36 ( <i>Cmc2<sub>1</sub></i> )                         | 4                           | 4 (m)                   | 0.52 | 0.58 | 90          | 90    | 268.72      | 3.7919  | 5            | 2            | 0            | 10           | 0.4035       | 0.3060       | 0.0000       | 0.3098       | 1.46    | 1       | 0       | 0.325   | 7        | 20       | 0        | 13.5     | 3.04                 | 1                    | 0                    | 1.755                | 1.91     | 1.97      | 3.37    |
| 18  | BaZn <sub>2</sub> Si <sub>2</sub> O <sub>7</sub>                                                        | 36 ( <i>Cmc2<sub>1</sub></i> )                         | 4                           | 4 (m)                   | 0.52 | 0.58 | 90          | 90    | 667.264     | 4.3432  | 5            | 2            | 0            | 16           | 0.3668       | 0.2114       | 0.0000       | 0.2483       | 1.38    | 1.35    | 0       | 0.43    | 8        | 56       | 0        | 22       | 3.44                 | 0.89                 | 0                    | 1.775                | 2.38     | 2.72      | 3.26    |
| 19  | BaAlSi <sub>4</sub> O <sub>3</sub> N <sub>3</sub>                                                       | 36 ( <i>Cmc2<sub>1</sub></i> )                         | 4                           | 4 (m)                   | 0.43 | 0.70 | 90          | 90    | 737.6778275 | 3.3016  | 11           | 2            | 0            | 14           | 0.3211       | 0.2103       | 0.0000       | 0.2615       | 1.416   | 1.57    | 0       | 0.2971  | 7.5454   | 56       | 0        | 13.7142  | 3.2581               | 0.89                 | 0                    | 1.8171               | 2.61     | 2.77      | 3.22    |
| 20  | SrAlSiN <sub>3</sub>                                                                                    | 36 ( <i>Cmc2<sub>1</sub></i> )                         | 4                           | 4 (m)                   | 0.53 | 0.59 | 90          | 90    | 293.53      | 4.195   | 5            | 2            | 0            | 10           | 0.3749       | 0.2984       | 0.0000       | 0.3040       | 1.46    | 1.18    | 0       | 0.325   | 7        | 38       | 0        | 13.5     | 3.04                 | 0.95                 | 0                    | 1.755                | 2.03     | 2.15      | 3.33    |
| 21  | MgAlSiN <sub>3</sub>                                                                                    | 36 ( <i>Cmc2<sub>1</sub></i> )                         | 4                           | 4 (m)                   | 0.52 | 0.58 | 90          | 90    | 249.5641688 | 3.3107  | 5            | 2            | 0            | 10           | 0.4425       | 0.3230       | 0.0000       | 0.3228       | 1.46    | 0.66    | 0       | 0.274   | 7        | 12       | 0        | 13.5     | 3.04                 | 1.31                 | 0                    | 1.755                | 1.75     | 2.24      | 2.19    |
| 22  | Sr(Al <sub>0.3</sub> Si <sub>0.7</sub> ) <sub>4</sub> (N <sub>0.8</sub> O <sub>0.2</sub> ) <sub>6</sub> | 43 ( <i>Fdd2</i> )                                     | 16                          | 1 (1)                   | 0.15 | 0.25 | 90          | 90    | 2103.4      | 3.65    | 10           | 2            | 0            | 13           | 0.3405       | 0.2328       | 0.0000       | 0.2853       | 1.4328  | 1.36    | 0       | 0.312   | 7.2      | 38       | 0        | 13.7     | 3.12                 | 0.95                 | 0                    | 1.813                | 2.53     | 2.86      | 3.19    |
| 23  | BaSi <sub>6</sub> N <sub>8</sub> O                                                                      | 44 ( <i>Imm2</i> )                                     | 2                           | 7 (mm2)                 | 0.50 | 0.84 | 90          | 90    | 379.66      | 3.7955  | 16           | 2            | 0            | 20           | 0.2932       | 0.2067       | 0.0000       | 0.2545       | 1.45    | 1.61    | 0       | 0.26    | 7.125    | 56       | 0        | 14       | 3.09                 | 0.89                 | 0                    | 1.9                  | 2.47     | 3.23      | 4.29    |
| 24  | SrSi <sub>6</sub> N <sub>8</sub>                                                                        | 44 ( <i>Imm2</i> )                                     | 2                           | 7 (mm2)                 | 0.52 | 0.85 | 90          | 90    | 349.21      | 3.5     | 10           | 2            | 0            | 12           | 0.3302       | 0.2083       | 0.0000       | 0.2765       | 1.46    | 1.36    | 0       | 0.26    | 7        | 38       | 0        | 14       | 3.04                 | 0.95                 | 0                    | 1.9                  | 2.76     | 2.85      | 3.28    |
| 25  | BaAlSi <sub>5</sub> O <sub>2</sub> N <sub>7</sub>                                                       | 44 ( <i>Imm2</i> )                                     | 2                           | 7 (mm2)                 | 0.51 | 0.85 | 90          | 90    | 390.09      | 3.7016  | 16           | 2            | 0            | 20           | 0.2912       | 0.2037       | 0.0000       | 0.2519       | 1.44    | 1.61    | 0       | 0.2763  | 7.125    | 56       | 0        | 13.8333  | 3.09                 | 0.89                 | 0                    | 1.8516               | 2.52     | 3.00      | 3.70    |
| 26  | KMg <sub>4</sub> (PO <sub>4</sub> ) <sub>3</sub>                                                        | 58 ( <i>Pnmm</i> )                                     | 4                           | 4 (m)                   | 0.38 | 0.58 | 90          | 90    | 965.4464846 | 2.898   | 8            | 1            | 6            | 4            | 0.3455       | 0.2504       | 0.2456       | 0.3019       | 1.38    | 1.51    | 0.7     | 0.17    | 8        | 19       | 12       | 15       | 3.44                 | 0.82                 | 1.31                 | 2.19                 | 2.79     | 3.11      | 4.99    |
| 27  | BaSi <sub>2</sub> O <sub>2</sub> N <sub>2</sub>                                                         | 60 ( <i>Pbcn</i> )                                     | 4                           | 3 (2)                   | 0.34 | 0.37 | 90          | 90    | 371.58      | 4.53    | 10           | 4            | 0            | 10           | 0.3360       | 0.2776       | 0.0000       | 0.2516       | 1.396   | 1.52    | 0       | 0.26    | 7.8      | 56       | 0        | 14       | 3.36                 | 0.89                 | 0                    | 1.9                  | 2.51     | 2.55      | 3.01    |
| 28  | MgSO <sub>4</sub>                                                                                       | 62 ( <i>Pnma</i> )                                     | 4                           | 2 (1)                   | 0.55 | 0.78 | 90          | 90    | 272.4       | 2.94    | 6            | 2            | 0            | 6            | 0.4766       | 0.2986       | 0.0000       | 0.3059       | 1.38    | 0.72    | 0       | 0.12    | 8        | 12       | 0        | 16       | 3.44                 | 1.31                 | 0                    | 2.58                 | 3.32     | 3.80      | 6.00    |

|    |                                                                                                                                                  |                          |    |          |      |      |    |     |             |        |    |    |   |    |        |        |        |        |        |       |        |        |             |      |      |         |        |       |       |        |      |      |      |
|----|--------------------------------------------------------------------------------------------------------------------------------------------------|--------------------------|----|----------|------|------|----|-----|-------------|--------|----|----|---|----|--------|--------|--------|--------|--------|-------|--------|--------|-------------|------|------|---------|--------|-------|-------|--------|------|------|------|
| 29 | CaSO <sub>4</sub>                                                                                                                                | 63 (Cmcn)                | 4  | 7 (mm2)  | 0.90 | 1.00 | 90 | 90  | 305.37      | 2.96   | 8  | 2  | 0 | 6  | 0.4052 | 0.2511 | 0.0000 | 0.2908 | 1.38   | 1.12  | 0      | 0.12   | 8           | 20   | 0    | 16      | 3.44   | 1     | 0     | 2.58   | 3.23 | 3.50 | 6.21 |
| 30 | BaSiN <sub>2</sub>                                                                                                                               | 64 (Cmca)                | 8  | 4 (m)    | 0.49 | 0.67 | 90 | 90  | 484.06      | 5.309  | 6  | 7  | 0 | 7  | 0.3488 | 0.2550 | 0.0000 | 0.2854 | 1.46   | 1.35  | 0      | 0.26   | 7           | 56   | 0    | 14      | 3.04   | 0.89  | 0     | 1.9    | 2.05 | 2.25 | 3.01 |
| 31 | RbBa(PO <sub>4</sub> )                                                                                                                           | 62 (Pnma)                | 4  | 4 (m)    | 0.57 | 0.78 | 90 | 90  | 450.92      | 4.68   | 9  | 4  | 6 | 6  | 0.3504 | 0.2243 | 0.2521 | 0.2575 | 1.38   | 1.47  | 1.69   | 0.17   | 8           | 56   | 37   | 15      | 3.44   | 0.89  | 0.82  | 2.19   | 2.88 | 2.98 | 5.00 |
| 32 | BaSO <sub>4</sub>                                                                                                                                | 62 (Pnma)                | 4  | 4 (m)    | 0.61 | 0.81 | 90 | 90  | 344.77      | 4.5    | 12 | 8  | 0 | 7  | 0.3417 | 0.2137 | 0.0000 | 0.2736 | 1.38   | 1.61  | 0      | 0.12   | 8           | 56   | 0    | 16      | 3.44   | 0.89  | 0     | 2.58   | 3.32 | 3.75 | 5.97 |
| 33 | SrB <sub>2</sub> Si <sub>2</sub> O <sub>8</sub>                                                                                                  | 62 (Pnma)                | 4  | 4 (m)    | 0.89 | 0.91 | 90 | 90  | 576.0392    | 4      | 10 | 4  | 0 | 12 | 0.3532 | 0.2069 | 0.0000 | 0.2825 | 1.38   | 1.36  | 0      | 0.115  | 8           | 38   | 0    | 9.5     | 3.44   | 0.95  | 0     | 1.97   | 2.85 | 2.93 | 5.49 |
| 34 | BaB <sub>2</sub> Si <sub>2</sub> O <sub>8</sub>                                                                                                  | 62 (Pnma)                | 4  | 4 (m)    | 0.90 | 0.90 | 90 | 90  | 606         | 4      | 10 | 4  | 0 | 12 | 0.3468 | 0.2036 | 0.0000 | 0.2785 | 1.38   | 1.52  | 0      | 0.115  | 8           | 56   | 0    | 9.5     | 3.44   | 0.89  | 0     | 1.97   | 3.06 | 3.19 | 5.54 |
| 35 | SrSO <sub>4</sub>                                                                                                                                | 62 (Pnma)                | 4  | 4 (m)    | 0.64 | 0.82 | 90 | 90  | 306.45335   | 3.97   | 12 | 8  | 0 | 7  | 0.3543 | 0.2228 | 0.0000 | 0.2799 | 1.38   | 1.44  | 0      | 0.12   | 8           | 38   | 0    | 16      | 3.44   | 0.95  | 0     | 2.58   | 3.31 | 3.61 | 5.93 |
| 36 | Sr[Mg <sub>2</sub> Al <sub>2</sub> N <sub>4</sub> ]                                                                                              | 87 (I4/m)                | 2  | 11 (4/m) | 0.41 | 1.00 | 90 | 90  | 218.32      | 3.75   | 8  | 2  | 0 | 12 | 0.3554 | 0.3006 | 0.0000 | 0.3063 | 1.46   | 1.26  | 0      | 0.48   | 7           | 38   | 0    | 12.5    | 3.04   | 0.95  | 0     | 1.46   | 2.03 | 2.04 | 1.93 |
| 37 | Sr <sub>8</sub> (Si <sub>4</sub> O <sub>12</sub> )Cl <sub>8</sub>                                                                                | 87 (I4/m)                | 16 | 1 (1)    | 0.85 | 1.00 | 90 | 90  | 1190.008075 | 3.5971 | 9  | 6  | 0 | 2  | 0.3420 | 0.2417 | 0.0000 | 0.3006 | 1.6188 | 1.31  | 0      | 0.26   | 11.6        | 38   | 0    | 14      | 3.328  | 0.95  | 0     | 1.9    | 2.55 | 2.78 | 5.13 |
| 38 | Ca[LiAl <sub>3</sub> N <sub>4</sub> ]                                                                                                            | 88 (I4/a)                | 16 | 1 (1)    | 0.87 | 0.87 | 90 | 90  | 1602.3      | 3.051  | 8  | 2  | 0 | 12 | 0.3669 | 0.3099 | 0.0000 | 0.3140 | 1.46   | 1.12  | 0      | 0.44   | 7           | 20   | 0    | 10.5    | 3.04   | 1     | 0     | 1.4525 | 1.86 | 2.00 | 3.02 |
| 39 | Sr[Mg <sub>3</sub> SiN <sub>4</sub> ]                                                                                                            | 88 (I4/a)                | 16 | 1 (1)    | 0.85 | 0.85 | 90 | 90  | 1785.4      | 3.641  | 12 | 10 | 0 | 12 | 0.3154 | 0.1827 | 0.0000 | 0.3030 | 1.46   | 1.26  | 0      | 0.4925 | 7           | 38   | 0    | 12.5    | 3.04   | 0.95  | 0     | 1.4575 | 2.02 | 2.07 | 3.01 |
| 40 | BaB <sub>8</sub> O <sub>13</sub>                                                                                                                 | 91 (P4 <sub>2</sub> 2)   | 4  | 3 (2)    | 0.65 | 0.65 | 90 | 90  | 967.21      | 2.97   | 12 | 10 | 0 | 18 | 0.3292 | 0.1461 | 0.0000 | 0.2595 | 1.38   | 1.61  | 0      | 0.11   | 8           | 56   | 0    | 5       | 3.44   | 0.89  | 0     | 2.04   | 3.04 | 3.20 | 5.55 |
| 41 | Ca <sub>2</sub> Al <sub>2</sub> SiO <sub>7</sub><br>(Ca <sub>2</sub> Al <sub>1.77</sub> Si <sub>1.23</sub> O <sub>6.77</sub> N <sub>0.23</sub> ) | 113 (P-42/m)             | 4  | 4 (m)    | 0.66 | 1.00 | 90 | 90  | 296.924     | 3.0669 | 8  | 1  | 0 | 10 | 0.3965 | 0.2858 | 0.0000 | 0.2805 | 1.3823 | 1.12  | 0      | 0.351  | 7.9671      | 20   | 0    | 13.3    | 3.4268 | 1     | 0     | 1.697  | 2.37 | 2.53 | 4.31 |
| 42 | SrCaSiAl <sub>2</sub> O <sub>7</sub>                                                                                                             | 113 (P-42/m)             | 4  | 4 (m)    | 0.66 | 1.00 | 90 | 90  | 309.346     | 3.4542 | 8  | 1  | 0 | 10 | 0.3773 | 0.2915 | 0.0000 | 0.2735 | 1.38   | 1.19  | 0      | 0.351  | 8           | 29   | 0    | 13.3    | 3.44   | 0.975 | 0     | 1.697  | 2.34 | 2.50 | 4.16 |
| 43 | Sr <sub>2</sub> Al <sub>1.6</sub> Si <sub>1.4</sub> O <sub>6.6</sub> N <sub>0.4</sub>                                                            | 113 (P-42/m)             | 4  | 4 (m)    | 0.67 | 1.00 | 90 | 90  | 323.31      | 3.83   | 8  | 1  | 0 | 10 | 0.3741 | 0.2815 | 0.0000 | 0.2720 | 1.3848 | 1.26  | 0      | 0.3328 | 7.9428      | 38   | 0    | 13.3333 | 3.4171 | 0.95  | 0     | 1.7066 | 2.55 | 2.40 | 4.06 |
| 44 | Sr <sub>2</sub> ZnSi <sub>2</sub> O <sub>7</sub>                                                                                                 | 113 (P-42/m)             | 4  | 4 (m)    | 0.65 | 1.00 | 90 | 90  | 331.0787312 | 4.0978 | 8  | 1  | 0 | 10 | 0.3746 | 0.2673 | 0.0000 | 0.2712 | 1.38   | 1.26  | 0      | 0.396  | 8           | 38   | 0    | 19.3333 | 3.44   | 0.95  | 0     | 1.8166 | 2.61 | 3.11 | 3.93 |
| 45 | Ca <sub>2</sub> MgSi <sub>2</sub> O <sub>7</sub>                                                                                                 | 113 (P-42/m)             | 4  | 4 (m)    | 0.63 | 1.00 | 90 | 90  | 307.55      | 2.95   | 8  | 1  | 0 | 10 | 0.3885 | 0.2692 | 0.0000 | 0.2763 | 1.38   | 1.12  | 0      | 0.384  | 8           | 20   | 0    | 13.3333 | 3.44   | 1     | 0     | 1.7033 | 2.39 | 2.75 | 4.51 |
| 46 | Sr <sub>2</sub> MgSi <sub>2</sub> O <sub>7</sub>                                                                                                 | 113 (P-42/m)             | 4  | 4 (m)    | 0.64 | 1.00 | 90 | 90  | 335.8704666 | 3.636  | 8  | 1  | 0 | 10 | 0.3758 | 0.2674 | 0.0000 | 0.2720 | 1.38   | 1.26  | 0      | 0.384  | 8           | 38   | 0    | 13.3333 | 3.44   | 0.95  | 0     | 1.7033 | 2.30 | 2.77 | 4.54 |
| 47 | SrLaGa <sub>3</sub> S <sub>6</sub> O                                                                                                             | 113 (P-42/m)             | 4  | 4 (m)    | 0.65 | 1.00 | 90 | 90  | 535.0782145 | 3.9997 | 8  | 1  | 0 | 10 | 0.3353 | 0.2470 | 0.0000 | 0.2316 | 1.7825 | 1.21  | 0      | 0.47   | 14.857<br>1 | 47.5 | 0    | 31      | 2.7028 | 1.025 | 0     | 1.81   | 2.30 | 2.37 | 2.55 |
| 48 | Li <sub>2</sub> CaSiO <sub>4</sub>                                                                                                               | 121 (I-42m)              | 2  | 14 (32m) | 0.78 | 0.78 | 90 | 90  | 165.21      | 2.94   | 8  | 12 | 0 | 14 | 0.3931 | 0.2042 | 0.0000 | 0.3128 | 1.38   | 1.12  | 0      | 0.4486 | 8           | 20   | 0    | 6.6667  | 3.44   | 1     | 0     | 1.2866 | 2.58 | 2.56 | 5.49 |
| 49 | KSRBP <sub>2</sub> O <sub>8</sub>                                                                                                                | 122 (I-42d)              | 8  | 3 (2)    | 0.51 | 0.51 | 90 | 90  | 701.7       | 3.1    | 8  | 2  | 0 | 8  | 0.3569 | 0.2462 | 0.0000 | 0.2746 | 1.38   | 1.385 | 0      | 0.155  | 8           | 28.5 | 0    | 11.6667 | 3.44   | 0.885 | 0     | 2.14   | 2.73 | 3.00 | 5.23 |
| 50 | KBaBP <sub>2</sub> O <sub>8</sub>                                                                                                                | 122 (I-42d)              | 8  | 3 (2)    | 0.50 | 0.50 | 90 | 90  | 741.7       | 3.378  | 8  | 2  | 0 | 8  | 0.3481 | 0.2445 | 0.0000 | 0.2682 | 1.38   | 1.465 | 0      | 0.155  | 8           | 37.5 | 0    | 11.6667 | 3.44   | 0.855 | 0     | 2.14   | 2.67 | 2.97 | 4.81 |
| 51 | BaMgSi <sub>4</sub> O <sub>10</sub>                                                                                                              | 130 (P4/ncc)             | 4  | 10 (4)   | 0.47 | 0.47 | 90 | 90  | 903.039456  | 3.19   | 8  | 4  | 4 | 8  | 0.3540 | 0.1888 | 0.2490 | 0.2737 | 1.38   | 1.42  | 0.57   | 0.26   | 8           | 56   | 12   | 14      | 3.44   | 0.89  | 1.31  | 1.9    | 2.76 | 2.82 | 4.42 |
| 52 | Sr <sub>3</sub> GdNa(PO <sub>4</sub> ) <sub>3</sub> F                                                                                            | 147 (P-3)                | 6  | 1 (1)    | 0.74 | 1.00 | 90 | 120 | 564.795     | 4.3925 | 10 | 6  | 4 | 5  | 0.3579 | 0.2372 | 0.2441 | 0.2828 | 1.373  | 1.36  | 1.0635 | 0.17   | 8.0769      | 38   | 37.5 | 15      | 3.4815 | 0.95  | 1.065 | 2.19   | 2.64 | 2.83 | 3.24 |
| 53 | BaAl <sub>2</sub> Si <sub>2</sub> O <sub>8</sub>                                                                                                 | 147 (P-3)                | 1  | 17 (3)   | 0.68 | 0.68 | 90 | 120 | 189.127     | 3.297  | 12 | 6  | 0 | 12 | 0.3211 | 0.1888 | 0.0000 | 0.2634 | 1.38   | 1.61  | 0      | 0.325  | 8           | 56   | 0    | 13.5    | 3.44   | 0.89  | 0     | 1.755  | 3.33 | 3.48 | 4.94 |
| 54 | SrSi <sub>8</sub> Al <sub>19</sub> ON <sub>31</sub>                                                                                              | 148 (R-3)                | 3  | 17 (3)   | 0.07 | 0.07 | 90 | 120 | 1949.735687 | 3.3332 | 12 | 6  | 0 | 12 | 0.3298 | 0.1874 | 0.0000 | 0.2796 | 1.4575 | 1.44  | 0      | 0.3482 | 7.0312      | 38   | 0    | 13.3214 | 3.0525 | 0.95  | 0     | 1.7032 | 2.63 | 2.89 | 1.84 |
| 55 | Li <sub>2</sub> SrSiO <sub>4</sub>                                                                                                               | 152 (P3 <sub>2</sub> 1)  | 3  | 3 (2)    | 0.40 | 0.40 | 90 | 120 | 272.1887873 | 3.54   | 8  | 12 | 0 | 14 | 0.3801 | 0.1974 | 0.0000 | 0.3022 | 1.38   | 1.26  | 0      | 0.4486 | 8           | 38   | 0    | 6.6667  | 3.44   | 0.95  | 0     | 1.2866 | 2.21 | 2.39 | 4.65 |
| 56 | SrBPO <sub>5</sub>                                                                                                                               | 154 (P3 <sub>2</sub> 21) | 3  | 3 (2)    | 1.00 | 1.00 | 90 | 120 | 282.03      | 3.7    | 10 | 4  | 0 | 10 | 0.3667 | 0.2315 | 0.0000 | 0.2798 | 1.38   | 1.36  | 0      | 0.146  | 8           | 38   | 0    | 11      | 3.44   | 0.95  | 0     | 2.13   | 2.84 | 3.01 | 5.39 |
| 57 | Ca-a-SiAlON<br>(Ca <sub>0.375</sub> Si <sub>11.25</sub> Al <sub>0.75</sub> N <sub>16</sub> )                                                     | 159 (P31c)               | 2  | 16 (3)   | 0.73 | 1.00 | 90 | 120 | 297.3119177 | 3.1384 | 11 | 8  | 0 | 12 | 0.3570 | 0.1852 | 0.0000 | 0.3192 | 1.46   | 1.285 | 0      | 0.2837 | 7           | 20   | 0    | 13.9375 | 3.04   | 1     | 0     | 1.8818 | 2.13 | 2.33 | 3.44 |
| 58 | Sr-a-SiAlON<br>(Sr <sub>0.375</sub> Si <sub>11.25</sub> Al <sub>0.75</sub> N <sub>16</sub> )                                                     | 159 (P31c)               | 2  | 16 (3)   | 0.73 | 1.00 | 90 | 120 | 297.2721148 | 3.2376 | 11 | 8  | 0 | 12 | 0.3559 | 0.1852 | 0.0000 | 0.3191 | 1.46   | 1.4   | 0      | 0.2779 | 7           | 38   | 0    | 13.9375 | 3.04   | 0.95  | 0     | 1.8818 | 2.16 | 2.34 | 1.77 |
| 59 | LiCaPO <sub>4</sub>                                                                                                                              | 159 (P31c)               | 6  | 1 (1)    | 0.76 | 0.76 | 90 | 120 | 488.6710363 | 2.89   | 8  | 4  | 0 | 6  | 0.3940 | 0.2648 | 0.0000 | 0.2987 | 1.38   | 1.12  | 0      | 0.24   | 8           | 20   | 0    | 9       | 3.44   | 1     | 0     | 1.585  | 2.64 | 2.71 | 5.18 |
| 60 | BaAlBO <sub>3</sub> F <sub>2</sub>                                                                                                               | 174 (P-6)                | 2  | 16 (3)   | 0.52 | 0.52 | 90 | 120 | 193.26      | 4.49   | 12 | 8  | 0 | 12 | 0.3454 | 0.2070 | 0.0000 | 0.2728 | 1.345  | 1.61  | 0      | 0.25   | 8.4         | 56   | 0    | 9       | 3.656  | 0.89  | 0     | 1.825  | 2.76 | 2.83 | 6.06 |



|    |                                                                   |                            |    |           |      |      |                  |       |             |        |    |    |    |        |        |        |        |        |                 |        |        |                 |        |       |      |                 |        |        |        |                 |      |      |      |
|----|-------------------------------------------------------------------|----------------------------|----|-----------|------|------|------------------|-------|-------------|--------|----|----|----|--------|--------|--------|--------|--------|-----------------|--------|--------|-----------------|--------|-------|------|-----------------|--------|--------|--------|-----------------|------|------|------|
| 61 | CaZrBaI <sub>9</sub> O <sub>18</sub>                              | 173 (P6 <sub>3</sub> )     | 2  | 17 (3̄)   | 0.97 | 1.00 | 90               | 120   | 557.74      | 4.007  | 6  | 10 | 6  | 18     | 0.4170 | 0.1287 | 0.1832 | 0.2457 | 1.38            | 1.12   | 0.59   | 0.2967          | 8      | 20    | 40   | 10.3333         | 3.44   | 1      | 1.33   | 1.7533          | 2.85 | 3.39 | 4.89 |
| 62 | SrYSi <sub>4</sub> N <sub>7</sub>                                 | 186 (P6 <sub>3</sub> ymc)  | 2  | 19 (3m)   | 0.61 | 0.61 | 90               | 120   | 306.83      | 4.188  | 12 | 12 | 4  | 12     | 0.3320 | 0.1664 | 0.2718 | 0.2851 | 1.46            | 1.44   | 0.9    | 0.26            | 7      | 38    | 39   | 14              | 3.04   | 0.95   | 1.22   | 1.9             | 2.24 | 2.79 | 2.76 |
| 63 | CaScSi <sub>4</sub> N <sub>7</sub>                                | 186 (P6 <sub>3</sub> ymc)  | 2  | 19 (3m)   | 0.61 | 0.61 | 90               | 120   | 288.98      | 3.3951 | 12 | 12 | 4  | 12     | 0.3393 | 0.1698 | 0.2772 | 0.2904 | 1.46            | 1.34   | 0.745  | 0.26            | 7      | 20    | 21   | 14              | 3.04   | 1      | 1.36   | 1.9             | 2.37 | 2.73 | 2.88 |
| 64 | SrScSi <sub>4</sub> N <sub>7</sub>                                | 186 (P6 <sub>3</sub> ymc)  | 2  | 19 (3m)   | 0.61 | 0.61 | 90               | 120   | 292.24      | 3.894  | 12 | 12 | 4  | 12     | 0.3383 | 0.1692 | 0.2764 | 0.2895 | 1.46            | 1.44   | 0.745  | 0.26            | 7      | 38    | 21   | 14              | 3.04   | 0.95   | 1.36   | 1.9             | 2.40 | 2.73 | 2.96 |
| 65 | BaScSi <sub>4</sub> N <sub>7</sub>                                | 186 (P6 <sub>3</sub> ymc)  | 2  | 19 (3m)   | 0.61 | 0.61 | 90               | 120   | 297.63      | 4.3816 | 12 | 12 | 4  | 12     | 0.3360 | 0.1681 | 0.2745 | 0.2876 | 1.46            | 1.61   | 0.745  | 0.26            | 7      | 56    | 21   | 14              | 3.04   | 0.89   | 1.36   | 1.9             | 2.38 | 2.67 | 2.91 |
| 66 | BaZrSi <sub>3</sub> O <sub>9</sub>                                | 188 (P-6c2)                | 2  | 18 (32)   | 0.68 | 0.68 | 90               | 120   | 395.841     | 3.8325 | 6  | 2  | 3  | 6      | 0.3598 | 0.1999 | 0.2563 | 0.2635 | 1.38            | 1.35   | 0.59   | 0.26            | 8      | 56    | 40   | 14              | 3.44   | 0.89   | 1.33   | 1.9             | 2.61 | 2.70 | 4.66 |
| 67 | BaHfSi <sub>3</sub> O <sub>9</sub>                                | 188 (P-6c2)                | 2  | 18 (32)   | 0.68 | 0.68 | 90               | 120   | 397.48      | 4.5459 | 6  | 2  | 3  | 6      | 0.3567 | 0.1999 | 0.2557 | 0.2654 | 1.38            | 1.35   | 0.58   | 0.26            | 8      | 56    | 72   | 14              | 3.44   | 0.89   | 1.3    | 1.9             | 2.61 | 2.74 | 4.69 |
| 68 | Mg <sub>2</sub> Al <sub>4</sub> Si <sub>5</sub> O <sub>18</sub>   | 192 (P6/mcc)               | 4  | 18 (32)   | 0.95 | 1.00 | 90               | 120   | 775.7       | 2.5044 | 6  | 2  | 0  | 9      | 0.4716 | 0.2144 | 0.0000 | 0.3042 | 1.38            | 0.72   | 0      | 0.3163          | 8      | 12    | 0    | 13.5555         | 3.44   | 1.31   | 0      | 1.7711          | 2.72 | 2.94 | 4.13 |
| 69 | Sr <sub>2</sub> ScAlO <sub>5</sub>                                | 205 (Pa-3)                 | 8  | 16 (3)    | 1.00 | 1.00 | 90               | 90    | 494.5008364 | 4.27   | 12 | 6  | 0  | 8      | 0.3566 | 0.2528 | 0.0000 | 0.2920 | 1.38            | 1.44   | 0      | 0.4788          | 8      | 38    | 0    | 17              | 3.44   | 0.95   | 0      | 1.485           | 2.02 | 2.16 | 3.13 |
| 70 | Sr <sub>8</sub> Al <sub>12</sub> O <sub>24</sub> S <sub>2</sub>   | 217 (I-43m)                | 8  | 19 (3m)   | 1.00 | 1.00 | 90               | 90    | 793.2512976 | 3.083  | 4  | 9  | 0  | 6      | 0.3856 | 0.2041 | 0.0000 | 0.2909 | 1.495           | 1.18   | 0      | 0.39            | 8.6153 | 38    | 0    | 13              | 3.3738 | 0.95   | 0      | 1.61            | 2.05 | 2.20 | 3.34 |
| 71 | Sr <sub>3</sub> Bi(PO <sub>4</sub> ) <sub>3</sub>                 | 220 (I-43d)                | 16 | 16 (3)    | 1.00 | 1.00 | 90               | 90    | 1062.300795 | 4.732  | 6  | 3  | 0  | 6      | 0.4164 | 0.2572 | 0.0000 | 0.2830 | 1.38            | 1.1425 | 0      | 0.17            | 8      | 49.25 | 0    | 15              | 3.44   | 1.2175 | 0      | 2.19            | 2.93 | 3.08 | 3.94 |
| 72 | Sr <sub>12</sub> Al <sub>14</sub> O <sub>32</sub> Cl <sub>2</sub> | 220 (I-43d)                | 24 | 3 (2)     | 1.00 | 1.00 | 90               | 90    | 1882.35     | 3.55   | 7  | 4  | 0  | 7      | 0.3750 | 0.2637 | 0.0000 | 0.2853 | 1.403           | 1.21   | 0      | 0.39            | 8.5294 | 38    | 0    | 13              | 3.4235 | 0.95   | 0      | 1.61            | 2.37 | 2.85 | 3.58 |
| 73 | Ca <sub>12</sub> Al <sub>14</sub> O <sub>32</sub> Cl <sub>2</sub> | 220 (I-43d)                | 24 | 3 (2)     | 1.00 | 1.00 | 90               | 90    | 1732.11     | 2.74   | 7  | 4  | 0  | 7      | 0.4005 | 0.2713 | 0.0000 | 0.2935 | 1.4414          | 1.06   | 0      | 0.39            | 8.5294 | 20    | 0    | 13              | 3.4235 | 1      | 0      | 1.61            | 2.81 | 3.10 | 3.75 |
| 74 | CsAlSi <sub>2</sub> O <sub>6</sub>                                | 230 (I-a-3d)               | 16 | 18 (32)   | 1.00 | 1.00 | 90               | 90    | 2593.94     | 3.2    | 12 | 3  | 0  | 9      | 0.2809 | 0.2058 | 0.0000 | 0.2483 | 1.38            | 1.88   | 0      | 0.303           | 8      | 55    | 0    | 13.6667         | 3.44   | 0.79   | 0      | 1.8033          | 2.78 | 3.13 | 4.11 |
| 75 | Ba <sub>2</sub> LiB <sub>5</sub> O <sub>10</sub>                  | 11 (P2 <sub>1</sub> /m)    | 4  | 1 (1)     | 0.30 | 0.46 | 104.26           | 90    | 417.6       | 3.941  | 12 | 6  | 0  | 11     | 0.3252 | 0.2242 | 0.0000 | 0.2801 | 1.38            | 1.61   | 0      | 0.197           | 8      | 56    | 0    | 4.6667          | 3.44   | 0.89   | 0      | 1.8633          | 2.11 | 3.00 | 4.93 |
| 76 | BaAl <sub>2</sub> B <sub>2</sub> O <sub>7</sub>                   | 155 (R32)                  | 3  | 18 (32)   | 0.21 | 0.21 | 90               | 120   | 528.01      | 3.07   | 6  | 6  | 0  | 12     | 0.3642 | 0.2000 | 0.0000 | 0.2812 | 1.3585<br>71429 | 1.35   | 0      | 0.2             | 8      | 56    | 0    | 9               | 3.44   | 0.89   | 0      | 1.825           | 3.31 | 3.45 | 4.65 |
| 77 | BaBeSiO <sub>4</sub>                                              | 8 (Cm)                     | 2  | 4 (m)     | 0.58 | 0.58 | 55.575           | 90    | 191.61      | 4.13   | 12 | 12 | 0  | 10     | 0.3310 | 0.1947 | 0.0000 | 0.2908 | 1.38            | 1.47   | 0      | 0.265           | 8      | 56    | 0    | 9               | 3.44   | 0.89   | 0      | 1.735           | 2.69 | 3.05 | 4.77 |
| 78 | BaGa <sub>2</sub> Si <sub>6</sub>                                 | 146 (R3)                   | 3  | 16 (3)    | 0.91 | 1.00 | 90               | 120   | 683.82      | 3.62   | 12 | 6  | 0  | 9      | 0.2827 | 0.1607 | 0.0000 | 0.2368 | 1.84            | 1.61   | 0      | 0.365           | 16     | 56    | 0    | 25.333          | 2.58   | 0.89   | 0      | 1.84            | 2.44 | 2.67 | 3.00 |
| 79 | BaMg <sub>3</sub> SiN <sub>4</sub>                                | 2 (P-1)                    | 1  | 2 (1̄)    | 0.57 | 0.99 | 73.697<br>73.566 | 117.6 | 4.16        | 8      | 2  | 0  | 12 | 0.3387 | 0.2898 | 0.0000 | 0.2982 | 1.46   | 1.42            | 0      | 0.4925 | 7               | 56     | 0     | 12.5 | 3.04            | 0.89   | 0      | 1.4575 | 1.82            | 2.09 | 1.82 |      |
| 80 | BaMgP <sub>2</sub> O <sub>7</sub>                                 | 14 (P2 <sub>1</sub> /c)    | 4  | 1 (1)     | 0.43 | 0.68 | 91.32            | 90    | 592.51      | 3.76   | 10 | 2  | 0  | 13     | 0.3454 | 0.2263 | 0.0000 | 0.2596 | 1.3557<br>1     | 1.42   | 0.72   | 0.17            | 8      | 56    | 12   | 15              | 3.44   | 0.89   | 1.31   | 2.19            | 3.06 | 3.27 | 5.32 |
| 81 | CsMgPO <sub>4</sub>                                               | 62 (Pnma)                  | 4  | 4 (m)     | 0.57 | 0.93 | 90               | 90    | 476.43      | 3.52   | 15 | 4  | 0  | 12     | 0.2799 | 0.2138 | 0.0000 | 0.2521 | 1.38            | 1.74   | 0      | 0.37            | 8      | 55    | 0    | 35              | 3.44   | 0.79   | 0      | 1.05            | 1.96 | 2.74 | 4.42 |
| 82 | LiSrPO <sub>4</sub>                                               | 170 (P6 <sub>3</sub> )     | 6  | 1 (1)     | 0.20 | 0.20 | 90               | 120   | 534.15      | 3.54   | 8  | 2  | 0  | 12     | 0.3751 | 0.2435 | 0.0000 | 0.2805 | 1.375           | 1.21   | 0      | 0.38            | 8      | 38    | 0    | 9.5             | 3.44   | 0.95   | 0      | 1.585           | 2.77 | 2.81 | 5.18 |
| 83 | RbLi(Li <sub>3</sub> SiO <sub>4</sub> ) <sub>2</sub>              | 12 (C2/m)                  | 4  | 4 (m)     | 0.41 | 0.50 | 90.53            | 90    | 770.98      | 2.74   | 8  | 2  | 0  | 12     | 0.3344 | 0.3107 | 0.0000 | 0.2957 | 1.3933<br>33333 | 1.61   | 0      | 0.5166<br>67    | 8      | 37    | 0    | 4.66667         | 3.44   | 0.82   | 0      | 1.184444        | 2.34 | 2.39 | 4.72 |
| 84 | Sr <sub>2</sub> Al <sub>2</sub> SiO <sub>7</sub>                  | 113 (P-42 <sub>1</sub> /m) | 4  | 4 (m)     | 0.67 | 1.00 | 90               | 90    | 321.91      | 3.81   | 8  | 1  | 0  | 10     | 0.3752 | 0.2794 | 0.0000 | 0.2718 | 1.38            | 1.26   | 0      | 0.3466<br>6666  | 8      | 38    | 0    | 13.33333        | 3.44   | 0.95   | 0      | 1.706667        | 2.35 | 2.67 | 4.06 |
| 85 | Sr <sub>4</sub> LiAl <sub>11</sub> N <sub>14</sub>                | 58 (Pnmm)                  | 4  | 4 (m)     | 0.31 | 1.00 | 90               | 90    | 351.91      | 4.01   | 8  | 2  | 0  | 11     | 0.3595 | 0.3091 | 0.0000 | 0.3067 | 1.46            | 1.26   | 0      | 0.4066<br>66667 | 7      | 38    | 0    | 12.08333        | 3.04   | 0.95   | 0      | 1.5575          | 1.86 | 1.97 | 2.07 |
| 86 | SrAl <sub>4</sub> O <sub>7</sub>                                  | 15 (C2/c)                  | 4  | 3 (2)     | 0.42 | 0.69 | 106.7            | 90    | 623.01      | 3.28   | 7  | 8  | 0  | 12     | 0.3826 | 0.1772 | 0.0000 | 0.2733 | 1.38            | 1.26   | 0      | 0.39            | 8      | 38    | 0    | 13              | 3.44   | 0.95   | 0      | 1.61            | 2.56 | 3.02 | 3.75 |
| 87 | SrB <sub>4</sub> O <sub>7</sub>                                   | 31 (Pmn2 <sub>1</sub> )    | 2  | 4 (m)     | 0.40 | 0.41 | 90               | 90    | 201         | 4.01   | 16 | 4  | 0  | 18     | 0.3446 | 0.2307 | 0.0000 | 0.2879 | 1.3714<br>2857  | 1.31   | 0      | 0.11            | 8      | 38    | 0    | 5               | 3.44   | 0.95   | 0      | 2.04            | 3.32 | 3.45 | 7.30 |
| 88 | BaSi <sub>2</sub> O <sub>5</sub>                                  | 62 (Pnma)                  | 4  | 4 (m)     | 0.34 | 0.57 | 90               | 90    | 481.51      | 3.77   | 9  | 6  | 0  | 4      | 0.3427 | 0.2155 | 0.0000 | 0.2863 | 1.368           | 1.47   | 0      | 0.26            | 8      | 38    | 0    | 14              | 3.44   | 0.95   | 0      | 1.9             | 2.49 | 3.10 | 4.79 |
| 89 | CdSrP <sub>2</sub> O <sub>7</sub>                                 | 14 (P2 <sub>1</sub> /c)    | 4  | 1 (1)     | 0.42 | 0.67 | 90.01            | 90    | 600.65      | 4.14   | 8  | 2  | 4  | 7      | 0.3794 | 0.2299 | 0.2520 | 0.2691 | 1.3671<br>4285  | 1.26   | 1.03   | 0.17            | 8      | 38    | 48   | 15              | 3.44   | 0.95   | 1.69   | 2.19            | 2.96 | 3.04 | 3.70 |
| 90 | Sr <sub>3</sub> NaY(PO <sub>4</sub> ) <sub>3</sub> F              | 147 (P-3)                  | 6  | 1 (1)     | 0.74 | 1.00 | 90               | 120   | 562.86      | 4      | 8  | 6  | 6  | 7      | 0.3819 | 0.2379 | 0.1784 | 0.2713 | 1.3712<br>5     | 1.26   | 1.18   | 0.4125<br>71429 | 8.125  | 38    | 11   | 21.85714<br>286 | 3.5075 | 0.95   | 0.93   | 1.912857<br>143 | 2.65 | 2.84 | 5.35 |
| 91 | SrMgAl <sub>10</sub> O <sub>17</sub>                              | 194 (P6 <sub>3</sub> /mmc) | 2  | 26 (6̄m2) | 0.25 | 0.25 | 90               | 120   | 613.17      | 3.54   | 6  | 6  | 0  | 12     | 0.3796 | 0.1777 | 0.0000 | 0.2784 | 1.3688<br>23529 | 1.18   | 0      | 0.5052<br>27273 | 8      | 38    | 0    | 12.90909        | 3.44   | 0.95   | 0      | 1.582727        | 2.56 | 2.92 | 4.36 |

**Table S4a.** The training, validation and hold-out dataset test results for (a) EBEW prediction model in terms of MSE and  $R^2$  using two data-splitting schemes: 9-cross-validation and 8-fold cross-validation with a holdout test dataset.

| EBEW           |                         |                     |                     |                       |                                                    |                     |                     |                       |               |                 |
|----------------|-------------------------|---------------------|---------------------|-----------------------|----------------------------------------------------|---------------------|---------------------|-----------------------|---------------|-----------------|
| ML algorithm   | 9-Fold Cross Validation |                     |                     |                       | 8-Fold Cross Validation with Hold-Out Dataset Test |                     |                     |                       |               |                 |
|                | MSE<br>(training)       | $R^2$<br>(training) | MSE<br>(validation) | $R^2$<br>(validation) | MSE<br>(training)                                  | $R^2$<br>(training) | MSE<br>(validation) | $R^2$<br>(validation) | MSE<br>(test) | $R^2$<br>(test) |
| Basic linear   | 0.006                   | 0.80                | 0.015               | 0.50                  | 0.006                                              | 0.82                | 0.016               | 0.44                  | 0.018         | 0.49            |
| Ridge          | 0.008                   | 0.75                | 0.013               | 0.60                  | 0.008                                              | 0.75                | 0.013               | 0.59                  | 0.012         | 0.65            |
| Lasso          | 0.009                   | 0.73                | 0.013               | 0.58                  | 0.008                                              | 0.74                | 0.014               | 0.55                  | 0.013         | 0.62            |
| LARS           | 0.010                   | 0.68                | 0.014               | 0.55                  | 0.010                                              | 0.69                | 0.014               | 0.53                  | 0.013         | 0.62            |
| Elastic net    | 0.008                   | 0.76                | 0.013               | 0.59                  | 0.008                                              | 0.76                | 0.014               | 0.55                  | 0.013         | 0.63            |
| KRR            | 0.010                   | 0.69                | 0.013               | 0.59                  | 0.010                                              | 0.69                | 0.013               | 0.55                  | 0.012         | 0.64            |
| BRR            | 0.008                   | 0.75                | 0.012               | 0.60                  | 0.008                                              | 0.76                | 0.013               | 0.59                  | 0.012         | 0.65            |
| ARD            | 0.008                   | 0.75                | 0.013               | 0.58                  | 0.008                                              | 0.76                | 0.014               | 0.53                  | 0.014         | 0.59            |
| Random Forest  | 0.002                   | 0.93                | 0.015               | 0.52                  | 0.002                                              | 0.93                | 0.015               | 0.52                  | 0.016         | 0.55            |
| Ada Boost      | 0.006                   | 0.83                | 0.017               | 0.46                  | 0.005                                              | 0.84                | 0.016               | 0.49                  | 0.014         | 0.59            |
| Gradient Boost | 0.004                   | 0.88                | 0.014               | 0.57                  | 0.004                                              | 0.88                | 0.015               | 0.53                  | 0.013         | 0.62            |
| XG Boost       | 0.001                   | 0.98                | 0.016               | 0.48                  | 0.001                                              | 0.98                | 0.015               | 0.51                  | 0.014         | 0.59            |
| SVR            | 0.008                   | 0.74                | 0.012               | 0.60                  | 0.008                                              | 0.75                | 0.013               | 0.56                  | 0.014         | 0.61            |
| KNN            | 0.000                   | 1.00                | 0.018               | 0.41                  | 0.000                                              | 1.00                | 0.018               | 0.39                  | 0.016         | 0.53            |
| PLS            | 0.016                   | 0.51                | 0.019               | 0.35                  | 0.016                                              | 0.51                | 0.020               | 0.36                  | 0.019         | 0.46            |
| GPR            | 0.000                   | 1.00                | 0.014               | 0.56                  | 0.000                                              | 1.00                | 0.013               | 0.60                  | 0.013         | 0.63            |
| Average        | 0.007                   | 0.80                | 0.014               | 0.53                  | 0.006                                              | 0.80                | 0.015               | 0.519                 | 0.014         | 0.59            |

**Table S4b.** The training, validation and hold-out dataset test results for (b)  $E_g$  prediction model in terms of MSE and  $R^2$  using two data-splitting schemes: 9-cross-validation and 8-fold cross-validation with a holdout test dataset.

| $E_g$          |                         |                     |                     |                       |                                                    |                     |                     |                       |               |                 |
|----------------|-------------------------|---------------------|---------------------|-----------------------|----------------------------------------------------|---------------------|---------------------|-----------------------|---------------|-----------------|
| ML algorithm   | 9-Fold Cross Validation |                     |                     |                       | 8-Fold Cross Validation with Hold-Out Dataset Test |                     |                     |                       |               |                 |
|                | MSE<br>(training)       | $R^2$<br>(training) | MSE<br>(validation) | $R^2$<br>(validation) | MSE<br>(training)                                  | $R^2$<br>(training) | MSE<br>(validation) | $R^2$<br>(validation) | MSE<br>(test) | $R^2$<br>(test) |
| Basic linear   | 0.006                   | 0.83                | 0.016               | 0.50                  | 0.006                                              | 0.82                | 0.025               | 0.18                  | 0.042         | 0.14            |
| Ridge          | 0.008                   | 0.78                | 0.014               | 0.62                  | 0.008                                              | 0.77                | 0.015               | 0.56                  | 0.018         | 0.63            |
| Lasso          | 0.008                   | 0.78                | 0.013               | 0.64                  | 0.008                                              | 0.78                | 0.014               | 0.54                  | 0.018         | 0.64            |
| LARS           | 0.009                   | 0.75                | 0.013               | 0.65                  | 0.009                                              | 0.75                | 0.013               | 0.61                  | 0.019         | 0.60            |
| Elastic net    | 0.008                   | 0.79                | 0.013               | 0.62                  | 0.007                                              | 0.79                | 0.013               | 0.64                  | 0.020         | 0.60            |
| KRR            | 0.011                   | 0.71                | 0.015               | 0.60                  | 0.011                                              | 0.70                | 0.015               | 0.58                  | 0.020         | 0.59            |
| BRR            | 0.008                   | 0.80                | 0.014               | 0.61                  | 0.008                                              | 0.79                | 0.014               | 0.60                  | 0.019         | 0.60            |
| ARD            | 0.008                   | 0.78                | 0.015               | 0.58                  | 0.008                                              | 0.77                | 0.013               | 0.58                  | 0.019         | 0.60            |
| Random Forest  | 0.002                   | 0.95                | 0.013               | 0.63                  | 0.002                                              | 0.94                | 0.014               | 0.60                  | 0.017         | 0.66            |
| Ada Boost      | 0.005                   | 0.86                | 0.013               | 0.60                  | 0.004                                              | 0.88                | 0.014               | 0.58                  | 0.019         | 0.60            |
| Gradient Boost | 0.002                   | 0.94                | 0.014               | 0.61                  | 0.002                                              | 0.95                | 0.013               | 0.61                  | 0.016         | 0.68            |
| XG Boost       | 0.000                   | 0.99                | 0.013               | 0.62                  | 0.000                                              | 0.99                | 0.015               | 0.53                  | 0.019         | 0.61            |
| SVR            | 0.008                   | 0.78                | 0.013               | 0.57                  | 0.008                                              | 0.77                | 0.014               | 0.51                  | 0.018         | 0.64            |
| KNN            | 0.000                   | 1.00                | 0.019               | 0.48                  | 0.000                                              | 1.00                | 0.019               | 0.47                  | 0.021         | 0.57            |
| PLS            | 0.015                   | 0.60                | 0.019               | 0.46                  | 0.014                                              | 0.62                | 0.020               | 0.40                  | 0.027         | 0.46            |
| GPR            | 0.000                   | 1.00                | 0.014               | 0.63                  | 0.000                                              | 1.00                | 0.015               | 0.58                  | 0.018         | 0.63            |
| Average        | 0.006                   | 0.83                | 0.014               | 0.59                  | 0.006                                              | 0.83                | 0.015               | 0.536                 | 0.021         | 0.58            |

**Table S5a.** The training and validation results for (a) PEW prediction models in terms of MSE for leave-one-out cross-validation with no holdout test dataset. Note that  $R^2$  is unavailable for the leave-one-out cross-validation scheme.

| PEW                            |                |                  |
|--------------------------------|----------------|------------------|
| Leave-one-out Cross Validation |                |                  |
| ML algorithm                   | MSE (training) | MSE (validation) |
| Basic linear                   | 0.012          | 0.028            |
| Ridge                          | 0.014          | 0.022            |
| Lasso                          | 0.014          | 0.023            |
| LARS                           | 0.016          | 0.022            |
| Elastic net                    | 0.013          | 0.022            |
| KRR                            | 0.016          | 0.022            |
| BRR                            | 0.013          | 0.022            |
| ARD                            | 0.014          | 0.022            |
| Random Forest                  | 0.004          | 0.025            |
| Ada Boost                      | 0.013          | 0.028            |
| Gradient Boost                 | 0.006          | 0.026            |
| XG Boost                       | 0.001          | 0.03             |
| SVR                            | 0.014          | 0.02             |
| KNN                            | 0              | 0.029            |
| PLS                            | 0.026          | 0.034            |
| GPR                            | 0              | 0.023            |

**Table S5b.** The training and validation results for (b) EBEW prediction models in terms of MSE for leave-one-out cross-validation with no holdout test dataset. Note that  $R^2$  is unavailable for the leave-one-out cross-validation scheme.

| EBEW                           |                |                  |
|--------------------------------|----------------|------------------|
| Leave-one-out Cross Validation |                |                  |
| ML algorithm                   | MSE (training) | MSE (validation) |
| Basic linear                   | 0.007          | 0.015            |
| Ridge                          | 0.008          | 0.013            |
| Lasso                          | 0.009          | 0.014            |
| LARS                           | 0.011          | 0.015            |
| Elastic net                    | 0.008          | 0.013            |
| KRR                            | 0.010          | 0.013            |
| BRR                            | 0.008          | 0.013            |
| ARD                            | 0.008          | 0.014            |
| Random Forest                  | 0.002          | 0.016            |
| Ada Boost                      | 0.007          | 0.018            |
| Gradient Boost                 | 0.004          | 0.014            |
| XG Boost                       | 0.001          | 0.018            |
| SVR                            | 0.009          | 0.013            |
| KNN                            | 0.000          | 0.018            |
| PLS                            | 0.016          | 0.021            |
| GPR                            | 0.000          | 0.014            |

**Table S5c.** The training and validation results for (c)  $E_g$  prediction model in terms of MSE for leave-one-out cross-validation with no holdout test dataset. Note that  $R^2$  is unavailable for the leave-one-out cross-validation scheme.

| Eg                             |                |                  |
|--------------------------------|----------------|------------------|
| Leave-one-out Cross Validation |                |                  |
| ML algorithm                   | MSE (training) | MSE (validation) |
| Basic linear                   | 0.007          | 0.019            |
| Ridge                          | 0.008          | 0.015            |
| Lasso                          | 0.009          | 0.014            |
| LARS                           | 0.010          | 0.014            |
| Elastic net                    | 0.008          | 0.014            |
| KRR                            | 0.011          | 0.015            |
| BRR                            | 0.008          | 0.015            |
| ARD                            | 0.008          | 0.017            |
| Random Forest                  | 0.002          | 0.014            |
| Ada Boost                      | 0.006          | 0.014            |
| Gradient Boost                 | 0.003          | 0.015            |
| XG Boost                       | 0.001          | 0.016            |
| SVR                            | 0.008          | 0.015            |
| KNN                            | 0.000          | 0.020            |
| PLS                            | 0.015          | 0.021            |
| GPR                            | 0.000          | 0.015            |

**Table S6a.** Over-fitting index for (a) PEW prediction model in terms of Training\_MSE/Validation\_MSE, Validation\_R<sup>2</sup>/Training\_R<sup>2</sup>, Training\_MSE/Test\_MSE and Test\_R<sup>2</sup>/Training\_R<sup>2</sup> for 9- and 8-fold cross validations.

| PEW               |                         |                        |                                                    |                        |           |                       |
|-------------------|-------------------------|------------------------|----------------------------------------------------|------------------------|-----------|-----------------------|
| Overfitting Index |                         |                        |                                                    |                        |           |                       |
| ML algorithm      | 9-Fold Cross Validation |                        | 8-Fold Cross Validation with Hold-Out Dataset Test |                        |           |                       |
|                   | MSE_tr/val              | R <sup>2</sup> _val/tr | MSE_tr/val                                         | R <sup>2</sup> _val/tr | MSE_tr/te | R <sup>2</sup> _te/tr |
| Basic linear      | 0.43                    | 0.59                   | 0.39                                               | 0.51                   | 0.33      | 0.48                  |
| Ridge             | 0.63                    | 0.81                   | 0.61                                               | 0.78                   | 0.66      | 0.81                  |
| Lasso             | 0.62                    | 0.79                   | 0.57                                               | 0.75                   | 0.70      | 0.82                  |
| LARS              | 0.71                    | 0.84                   | 0.67                                               | 0.77                   | 0.71      | 0.82                  |
| ENR               | 0.60                    | 0.78                   | 0.52                                               | 0.66                   | 0.71      | 0.85                  |
| KRR               | 0.77                    | 0.87                   | 0.76                                               | 0.85                   | 0.90      | 0.92                  |
| BRR               | 0.60                    | 0.79                   | 0.59                                               | 0.77                   | 0.65      | 0.80                  |
| ARD               | 0.66                    | 0.81                   | 0.56                                               | 0.73                   | 0.69      | 0.82                  |
| Random Forest     | 0.15                    | 0.63                   | 0.15                                               | 0.57                   | 0.16      | 0.58                  |
| Ada Boost         | 0.52                    | 0.71                   | 0.42                                               | 0.55                   | 0.61      | 0.79                  |
| Gradient Boost    | 0.20                    | 0.64                   | 0.15                                               | 0.52                   | 0.14      | 0.51                  |
| XG Boost          | 0.04                    | 0.54                   | 0.03                                               | 0.51                   | 0.03      | 0.46                  |
| SVR               | 0.66                    | 0.82                   | 0.57                                               | 0.75                   | 0.77      | 0.88                  |
| KNN               | 0.00                    | 0.48                   | 0.00                                               | 0.45                   | 0.00      | 0.32                  |
| PLS               | 0.83                    | 0.74                   | 0.82                                               | 0.80                   | 0.81      | 0.74                  |
| GPR               | 0.00                    | 0.62                   | 0.00                                               | 0.61                   | 0.00      | 0.52                  |

**Table S6b.** Over-fitting index for (b) EBEW model in terms of Training\_MSE/Validation\_MSE, Validation\_R<sup>2</sup>/Training\_R<sup>2</sup>, Training\_MSE/Test\_MSE and Test\_R<sup>2</sup>/Training\_R<sup>2</sup> for 9- and 8-fold cross validations.

EBEW

| Overfitting Index |                         |                        |                                                    |                        |           |                       |
|-------------------|-------------------------|------------------------|----------------------------------------------------|------------------------|-----------|-----------------------|
| ML algorithm      | 9-Fold Cross Validation |                        | 8-Fold Cross Validation with Hold-Out Dataset Test |                        |           |                       |
|                   | MSE_tr/val              | R <sup>2</sup> _val/tr | MSE_tr/val                                         | R <sup>2</sup> _val/tr | MSE_tr/te | R <sup>2</sup> _te/tr |
| Basic linear      | 0.43                    | 0.62                   | 0.34                                               | 0.54                   | 0.32      | 0.59                  |
| Ridge             | 0.65                    | 0.80                   | 0.62                                               | 0.78                   | 0.66      | 0.86                  |
| Lasso             | 0.67                    | 0.79                   | 0.61                                               | 0.74                   | 0.63      | 0.84                  |
| LARS              | 0.72                    | 0.81                   | 0.71                                               | 0.77                   | 0.74      | 0.89                  |
| ENR               | 0.63                    | 0.78                   | 0.56                                               | 0.72                   | 0.59      | 0.82                  |
| KRR               | 0.80                    | 0.86                   | 0.75                                               | 0.80                   | 0.80      | 0.93                  |
| BRR               | 0.65                    | 0.80                   | 0.61                                               | 0.78                   | 0.64      | 0.85                  |
| ARD               | 0.62                    | 0.76                   | 0.56                                               | 0.69                   | 0.56      | 0.78                  |
| Random Forest     | 0.16                    | 0.56                   | 0.14                                               | 0.56                   | 0.14      | 0.59                  |
| Ada Boost         | 0.33                    | 0.56                   | 0.32                                               | 0.59                   | 0.36      | 0.70                  |
| Gradient Boost    | 0.28                    | 0.64                   | 0.27                                               | 0.61                   | 0.30      | 0.71                  |
| XG Boost          | 0.04                    | 0.49                   | 0.04                                               | 0.52                   | 0.05      | 0.60                  |
| SVR               | 0.68                    | 0.81                   | 0.65                                               | 0.76                   | 0.60      | 0.81                  |
| KNN               | 0.00                    | 0.41                   | 0.00                                               | 0.39                   | 0.00      | 0.53                  |
| PLS               | 0.83                    | 0.70                   | 0.78                                               | 0.71                   | 0.84      | 0.89                  |
| GPR               | 0.00                    | 0.56                   | 0.00                                               | 0.60                   | 0.00      | 0.63                  |



**Table S6c.** Over-fitting index for (c)  $E_g$  prediction model in terms of Training\_MSE/Validation\_MSE, Validation\_R<sup>2</sup>/Training\_R<sup>2</sup>, Training\_MSE/Test\_MSE and Test\_R<sup>2</sup>/Training\_R<sup>2</sup> for 9- and 8-fold cross validations.

Eg

| Overfitting Index |                         |                        |                                                    |                        |           |                       |
|-------------------|-------------------------|------------------------|----------------------------------------------------|------------------------|-----------|-----------------------|
| ML algorithm      | 9-Fold Cross Validation |                        | 8-Fold Cross Validation with Hold-Out Dataset Test |                        |           |                       |
|                   | MSE_tr/val              | R <sup>2</sup> _val/tr | MSE_tr/val                                         | R <sup>2</sup> _val/tr | MSE_tr/te | R <sup>2</sup> _te/tr |
| Basic linear      | 0.39                    | 0.60                   | 0.25                                               | 0.22                   | 0.15      | 0.17                  |
| Ridge             | 0.59                    | 0.80                   | 0.54                                               | 0.73                   | 0.43      | 0.81                  |
| Lasso             | 0.63                    | 0.82                   | 0.54                                               | 0.69                   | 0.44      | 0.82                  |
| LARS              | 0.72                    | 0.87                   | 0.67                                               | 0.80                   | 0.45      | 0.80                  |
| ENR               | 0.59                    | 0.79                   | 0.56                                               | 0.81                   | 0.38      | 0.76                  |
| KRR               | 0.73                    | 0.84                   | 0.71                                               | 0.82                   | 0.52      | 0.84                  |
| BRR               | 0.53                    | 0.76                   | 0.53                                               | 0.76                   | 0.39      | 0.77                  |
| ARD               | 0.54                    | 0.74                   | 0.61                                               | 0.76                   | 0.43      | 0.78                  |
| Random Forest     | 0.16                    | 0.67                   | 0.15                                               | 0.63                   | 0.12      | 0.70                  |
| Ada Boost         | 0.40                    | 0.70                   | 0.30                                               | 0.67                   | 0.22      | 0.69                  |
| Gradient Boost    | 0.15                    | 0.64                   | 0.13                                               | 0.65                   | 0.11      | 0.72                  |
| XG Boost          | 0.04                    | 0.62                   | 0.03                                               | 0.53                   | 0.02      | 0.62                  |
| SVR               | 0.59                    | 0.73                   | 0.56                                               | 0.66                   | 0.45      | 0.83                  |
| KNN               | 0.00                    | 0.48                   | 0.00                                               | 0.47                   | 0.00      | 0.57                  |
| PLS               | 0.80                    | 0.77                   | 0.69                                               | 0.65                   | 0.51      | 0.74                  |
| GPR               | 0.00                    | 0.63                   | 0.00                                               | 0.58                   | 0.00      | 0.63                  |

**Table S7a.** Summary of the surrogate ML model regression results for (a) PEW prediction model. The training, validation and test results in terms of MSE,  $R^2$ , and over-fitting index for 8-fold cross validation with a holdout dataset test.

PEW

| ML algorithm   | 9-Feature Surrogate Model (8-Fold Cross Validation with Hold-Out Dataset Test) |                     |                     |                       |               |                 | Overfitting Index |                |
|----------------|--------------------------------------------------------------------------------|---------------------|---------------------|-----------------------|---------------|-----------------|-------------------|----------------|
|                | MSE<br>(training)                                                              | $R^2$<br>(training) | MSE<br>(validation) | $R^2$<br>(validation) | MSE<br>(test) | $R^2$<br>(test) | MSE_tr/val        | $R^2_{val/tr}$ |
| Basic linear   | 0.031                                                                          | 0.44                | 0.056               | 0.02                  | 0.021         | 0.61            | 0.56              | 0.05           |
| Ridge          | 0.035                                                                          | 0.38                | 0.042               | 0.20                  | 0.029         | 0.45            | 0.82              | 0.53           |
| Lasso          | 0.034                                                                          | 0.40                | 0.042               | 0.22                  | 0.048         | 0.09            | 0.80              | 0.55           |
| LARS           | 0.034                                                                          | 0.39                | 0.040               | 0.27                  | 0.029         | 0.46            | 0.85              | 0.69           |
| ENR            | 0.033                                                                          | 0.41                | 0.044               | 0.16                  | 0.031         | 0.42            | 0.76              | 0.40           |
| KRR            | 0.039                                                                          | 0.30                | 0.047               | 0.10                  | 0.049         | 0.08            | 0.83              | 0.33           |
| BRR            | 0.034                                                                          | 0.39                | 0.044               | 0.18                  | 0.028         | 0.48            | 0.78              | 0.46           |
| ARD            | 0.035                                                                          | 0.38                | 0.041               | 0.25                  | 0.036         | 0.32            | 0.85              | 0.65           |
| Random Forest  | 0.007                                                                          | 0.88                | 0.040               | 0.21                  | 0.028         | 0.48            | 0.17              | 0.24           |
| Ada Boost      | 0.022                                                                          | 0.61                | 0.039               | 0.26                  | 0.032         | 0.40            | 0.56              | 0.42           |
| Gradient Boost | 0.010                                                                          | 0.82                | 0.034               | 0.37                  | 0.035         | 0.34            | 0.30              | 0.45           |
| XG Boost       | 0.004                                                                          | 0.94                | 0.041               | 0.26                  | 0.034         | 0.35            | 0.09              | 0.28           |
| SVR            | 0.034                                                                          | 0.39                | 0.044               | 0.17                  | 0.028         | 0.48            | 0.77              | 0.44           |
| KNN            | 0.000                                                                          | 1.00                | 0.048               | 0.13                  | 0.021         | 0.60            | 0.00              | 0.13           |
| PLS            | 0.038                                                                          | 0.32                | 0.044               | 0.14                  | 0.054         | -0.02           | 0.87              | 0.43           |
| GPR            | 0.000                                                                          | 1.00                | 0.041               | 0.19                  | 0.049         | 0.08            | 0.00              | 0.19           |

**Table S7b.** Summary of the surrogate ML model regression results for (b) EBEW prediction model. The training, validation and test results in terms of MSE,  $R^2$ , and over-fitting index for 8-fold cross validation with a holdout dataset test. The negative  $R^2$  could be regarded as a regression failure.

EBEW

| ML algorithm   | 9-Feature Surrogate Model (8-Fold Cross Validation with Hold-Out Dataset Test) |                     |                     |                       |               |                 | Overfitting Index |                |
|----------------|--------------------------------------------------------------------------------|---------------------|---------------------|-----------------------|---------------|-----------------|-------------------|----------------|
|                | MSE<br>(training)                                                              | $R^2$<br>(training) | MSE<br>(validation) | $R^2$<br>(validation) | MSE<br>(test) | $R^2$<br>(test) | MSE_tr/val        | $R^2_{val/tr}$ |
| Basic linear   | 0.018                                                                          | 0.42                | 0.045               | -1.58                 | 0.019         | 0.46            | 0.41              | -3.73          |
| Ridge          | 0.020                                                                          | 0.36                | 0.023               | 0.28                  | 0.028         | 0.18            | 0.88              | 0.78           |
| Lasso          | 0.020                                                                          | 0.37                | 0.024               | 0.27                  | 0.027         | 0.21            | 0.86              | 0.72           |
| LARS           | 0.020                                                                          | 0.36                | 0.023               | 0.30                  | 0.028         | 0.20            | 0.90              | 0.83           |
| ENR            | 0.020                                                                          | 0.38                | 0.023               | 0.27                  | 0.026         | 0.24            | 0.85              | 0.71           |
| KRR            | 0.029                                                                          | 0.07                | 0.039               | -0.14                 | 0.019         | 0.46            | 0.76              | -1.90          |
| BRR            | 0.020                                                                          | 0.37                | 0.023               | 0.28                  | 0.028         | 0.19            | 0.87              | 0.75           |
| ARD            | 0.019                                                                          | 0.40                | 0.021               | 0.34                  | 0.023         | 0.33            | 0.92              | 0.85           |
| Random Forest  | 0.004                                                                          | 0.88                | 0.023               | 0.25                  | 0.022         | 0.36            | 0.16              | 0.28           |
| Ada Boost      | 0.014                                                                          | 0.57                | 0.021               | 0.33                  | 0.023         | 0.33            | 0.65              | 0.58           |
| Gradient Boost | 0.010                                                                          | 0.69                | 0.020               | 0.42                  | 0.019         | 0.44            | 0.51              | 0.61           |
| XG Boost       | 0.002                                                                          | 0.94                | 0.023               | 0.07                  | 0.023         | 0.33            | 0.09              | 0.07           |
| SVR            | 0.020                                                                          | 0.38                | 0.022               | 0.30                  | 0.024         | 0.30            | 0.90              | 0.78           |
| KNN            | 0.000                                                                          | 1.00                | 0.030               | 0.00                  | 0.017         | 0.52            | 0.00              | 0.00           |
| PLS            | 0.023                                                                          | 0.29                | 0.024               | 0.22                  | 0.032         | 0.08            | 0.93              | 0.75           |
| GPR            | -                                                                              | -                   | -                   | -                     | -             | -               | -                 | -              |

**Table S7c.** Summary of the surrogate ML model regression results for (c)  $E_g$  prediction model. The training, validation and test results in terms of MSE,  $R^2$ , and over-fitting index for 8-fold cross validation with a holdout dataset test. The negative  $R^2$  could be regarded as a regression failure.

$E_g$

| ML algorithm   | 9-Feature Surrogate Model (8-Fold Cross Validation with Hold-Out Dataset Test) |                     |                     |                       |               |                 | Overfitting Index |                |
|----------------|--------------------------------------------------------------------------------|---------------------|---------------------|-----------------------|---------------|-----------------|-------------------|----------------|
|                | MSE<br>(training)                                                              | $R^2$<br>(training) | MSE<br>(validation) | $R^2$<br>(validation) | MSE<br>(test) | $R^2$<br>(test) | MSE_tr/val        | $R^2_{val/tr}$ |
| Basic linear   | 0.01                                                                           | 0.648               | 0.02                | 0.476                 | 0.05          | -0.088          | 0.657             | 0.734          |
| Ridge          | 0.01                                                                           | 0.604               | 0.02                | 0.539                 | 0.02          | 0.515           | 0.863             | 0.893          |
| Lasso          | 0.01                                                                           | 0.617               | 0.02                | 0.574                 | 0.03          | 0.341           | 0.894             | 0.931          |
| LARS           | 0.01                                                                           | 0.604               | 0.02                | 0.570                 | 0.03          | 0.429           | 0.920             | 0.943          |
| ENR            | 0.01                                                                           | 0.628               | 0.01                | 0.586                 | 0.03          | 0.488           | 0.893             | 0.934          |
| KRR            | 0.02                                                                           | 0.351               | 0.03                | 0.115                 | 0.04          | 0.086           | 0.807             | 0.328          |
| BRR            | 0.01                                                                           | 0.639               | 0.01                | 0.589                 | 0.02          | 0.577           | 0.872             | 0.923          |
| ARD            | 0.01                                                                           | 0.613               | 0.02                | 0.567                 | 0.02          | 0.539           | 0.892             | 0.924          |
| Random Forest  | 0.00                                                                           | 0.922               | 0.02                | 0.446                 | 0.02          | 0.565           | 0.147             | 0.484          |
| Ada Boost      | 0.01                                                                           | 0.749               | 0.02                | 0.448                 | 0.03          | 0.461           | 0.462             | 0.598          |
| Gradient Boost | 0.00                                                                           | 0.872               | 0.02                | 0.398                 | 0.03          | 0.367           | 0.227             | 0.456          |
| XG Boost       | 0.00                                                                           | 0.956               | 0.02                | 0.333                 | 0.02          | 0.607           | 0.071             | 0.348          |
| SVR            | 0.01                                                                           | 0.628               | 0.01                | 0.588                 | 0.02          | 0.537           | 0.896             | 0.937          |
| KNN            | 0.00                                                                           | 1.000               | 0.02                | 0.238                 | 0.02          | 0.613           | 0.000             | 0.238          |
| PLS            | 0.02                                                                           | 0.545               | 0.02                | 0.497                 | 0.03          | 0.308           | 0.927             | 0.912          |
| GPR            | 0.03                                                                           | 0.208               | 0.03                | 0.042                 | 0.04          | 0.158           | 0.893             | 0.201          |

**Fig. S1** Fitting result summary for EBEW (a~d) and  $E_g$  (e~h) prediction models.

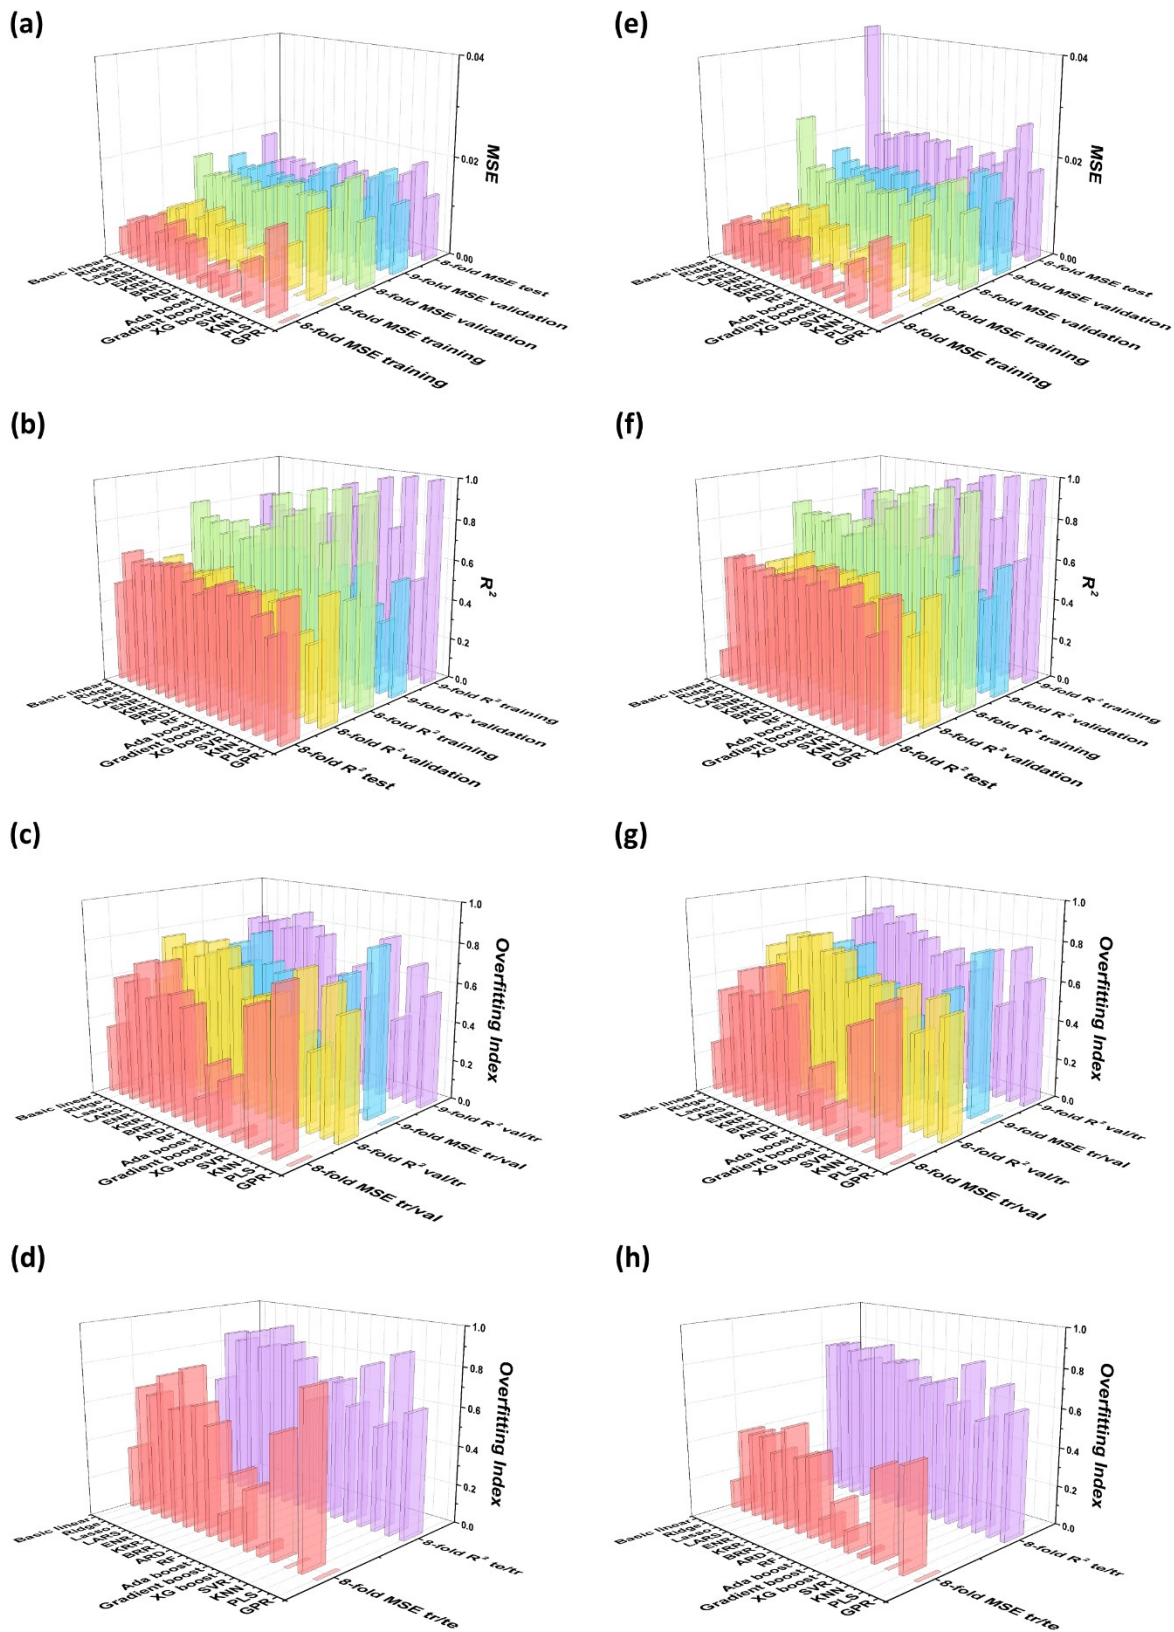

**Fig. S2a** Plots of predicted vs. experimental PEW for 9-fold cross validation.

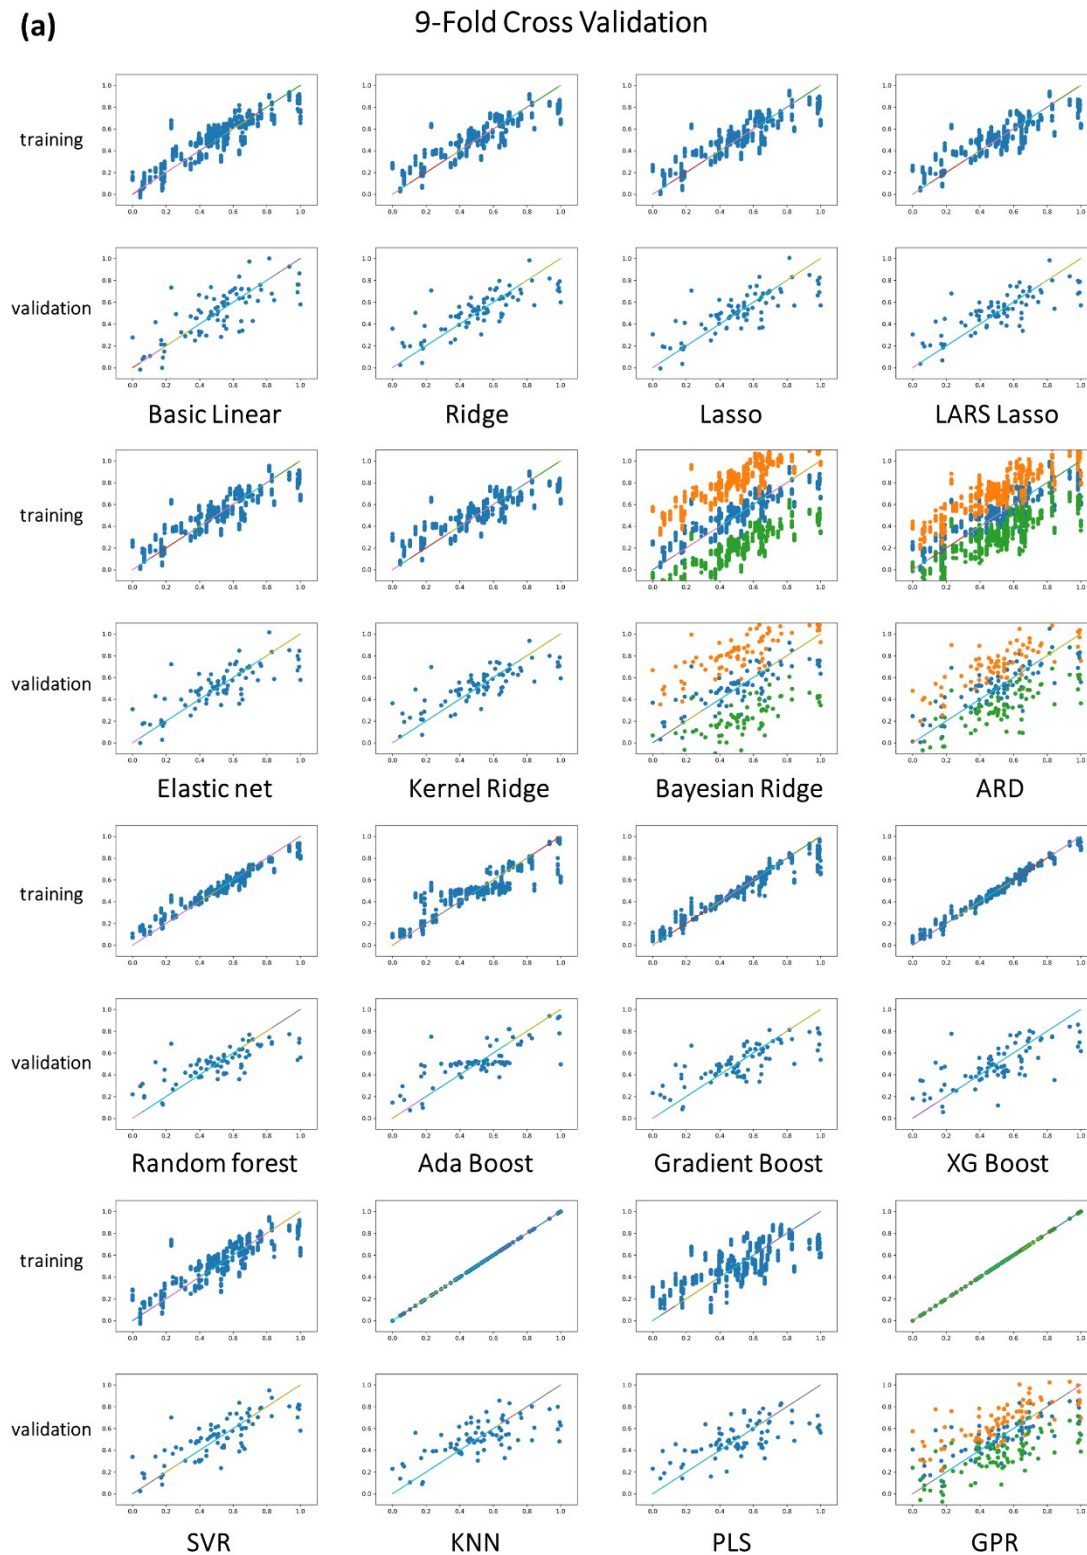

**Fig. S2b** Plots of predicted vs. experimental EBEW for 9-fold cross validation.

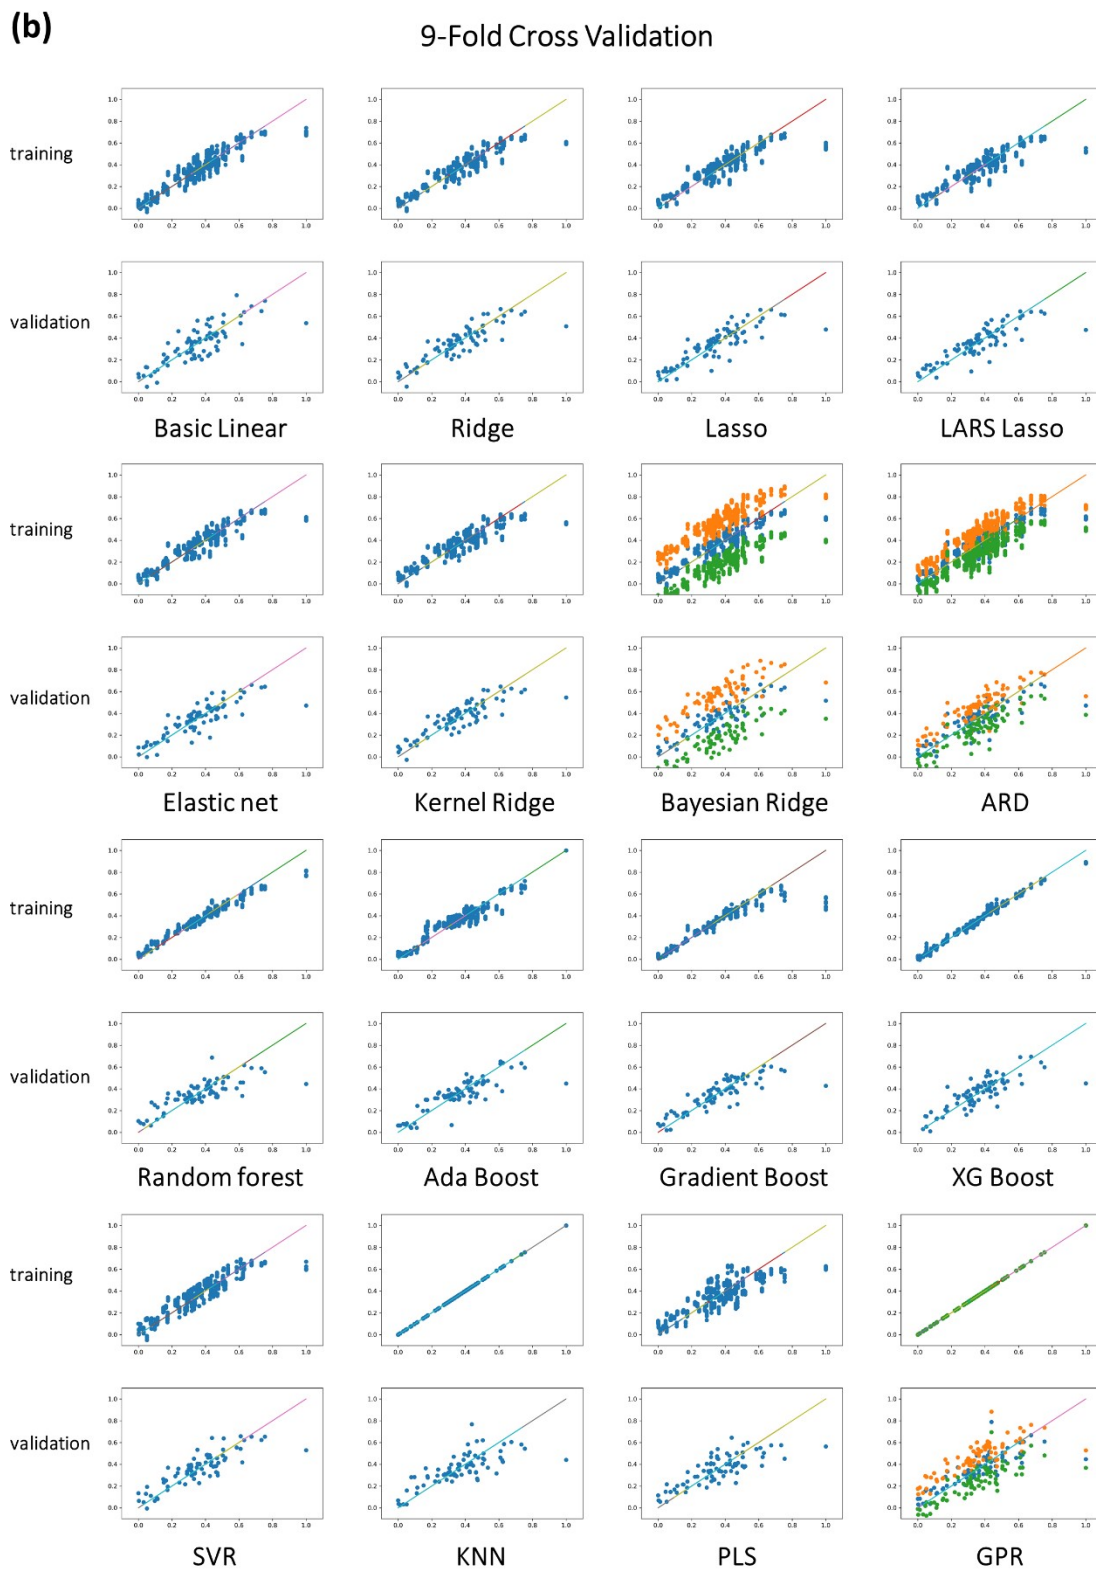

Fig. S2c Plots of predicted vs. experimental  $E_g$  for 9-fold cross validation.

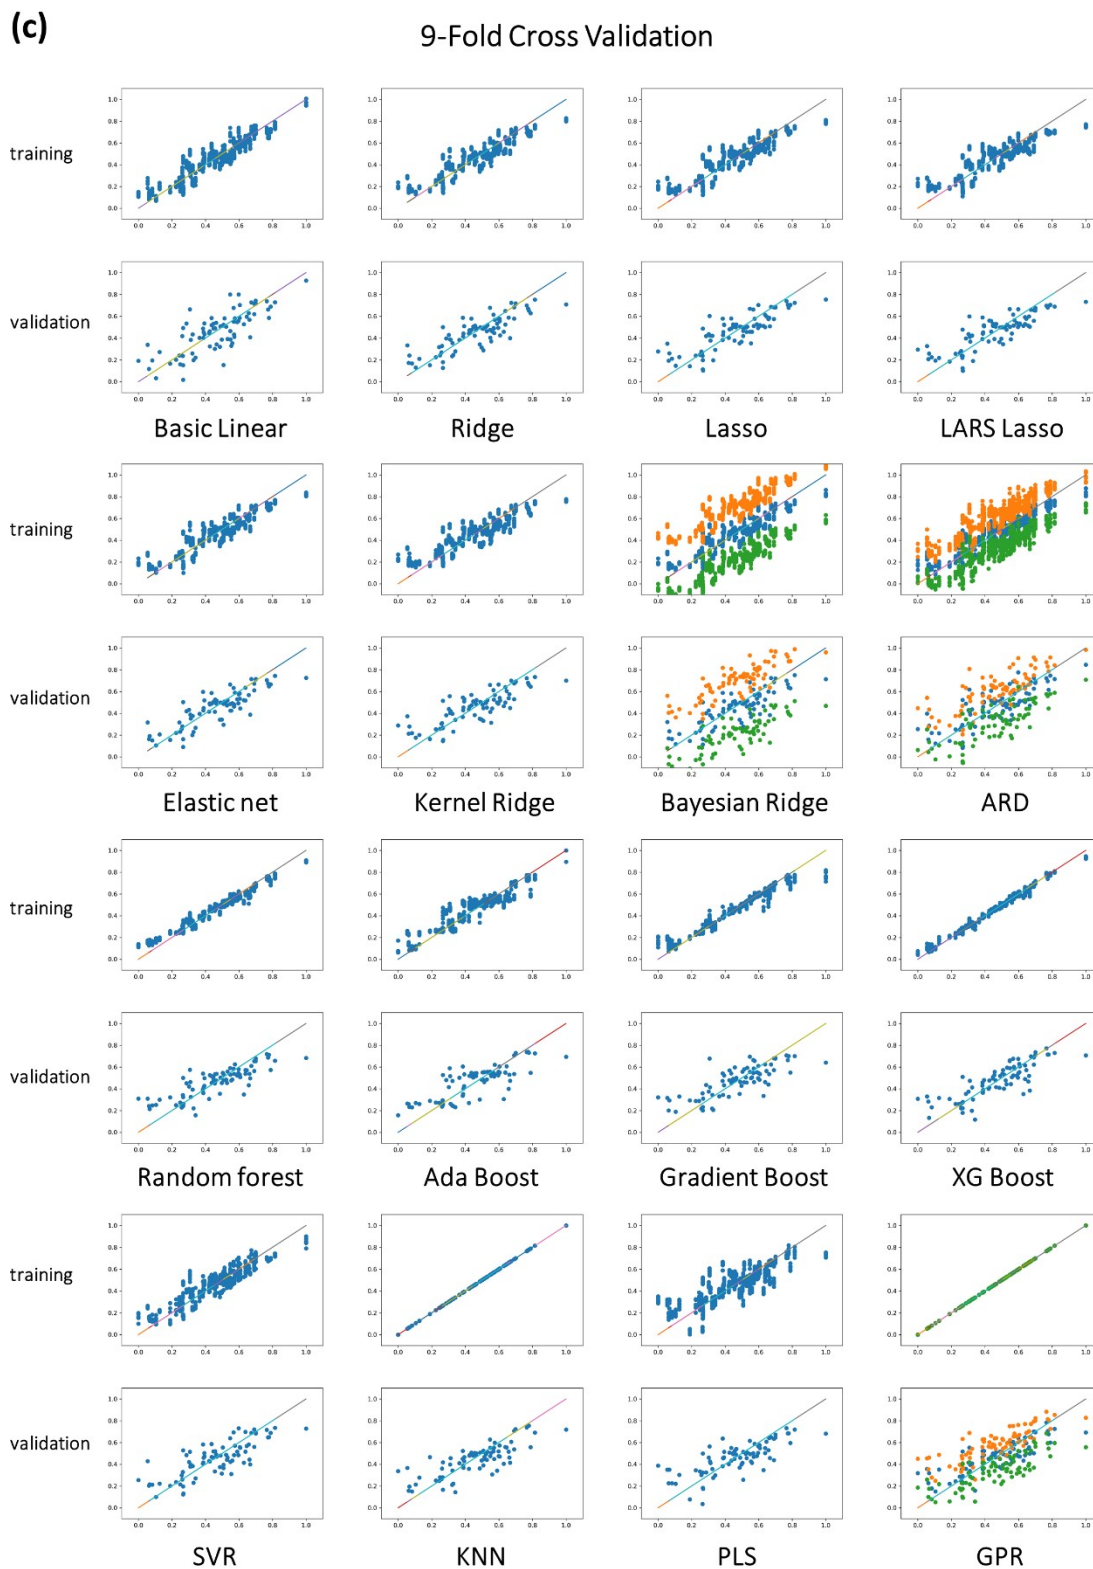



**Fig. S3a** Plots of ML-predicted vs. experimental PEW for every ML algorithm for leave-one-out cross-validation with no holdout test dataset.

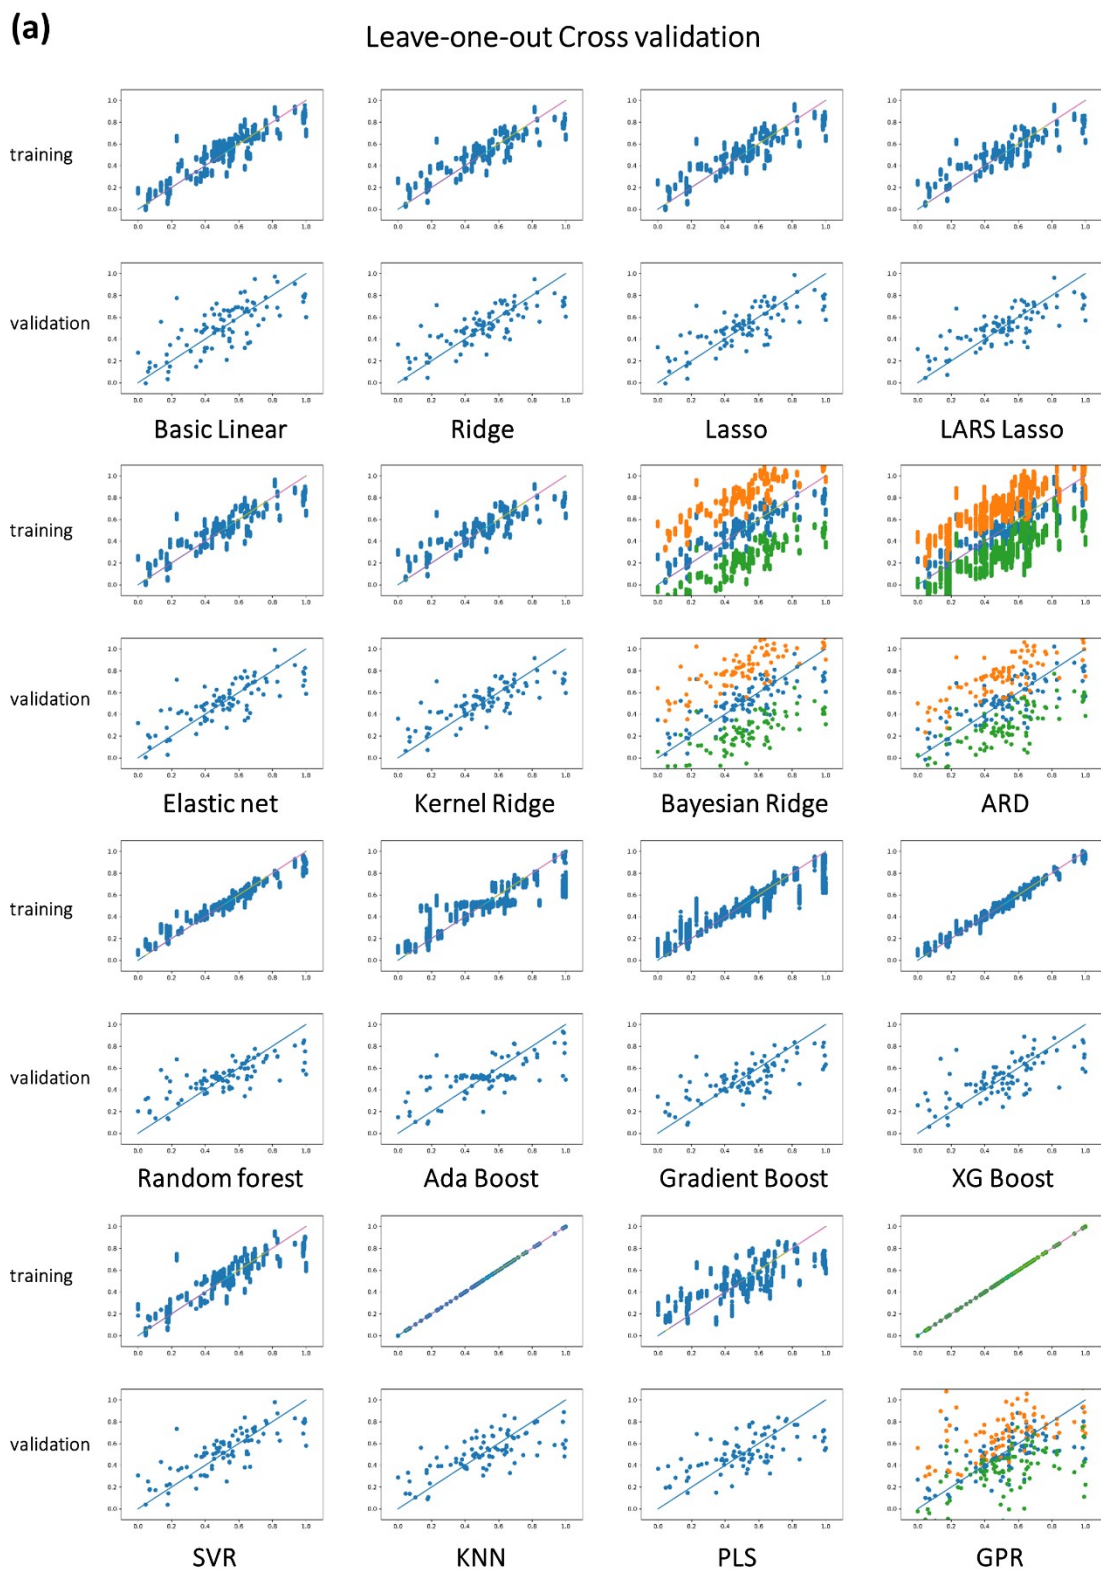

**Fig. S3b** Plots of ML-predicted vs. experimental EBEW for every ML algorithm for leave-one-out cross-validation with no holdout test dataset.

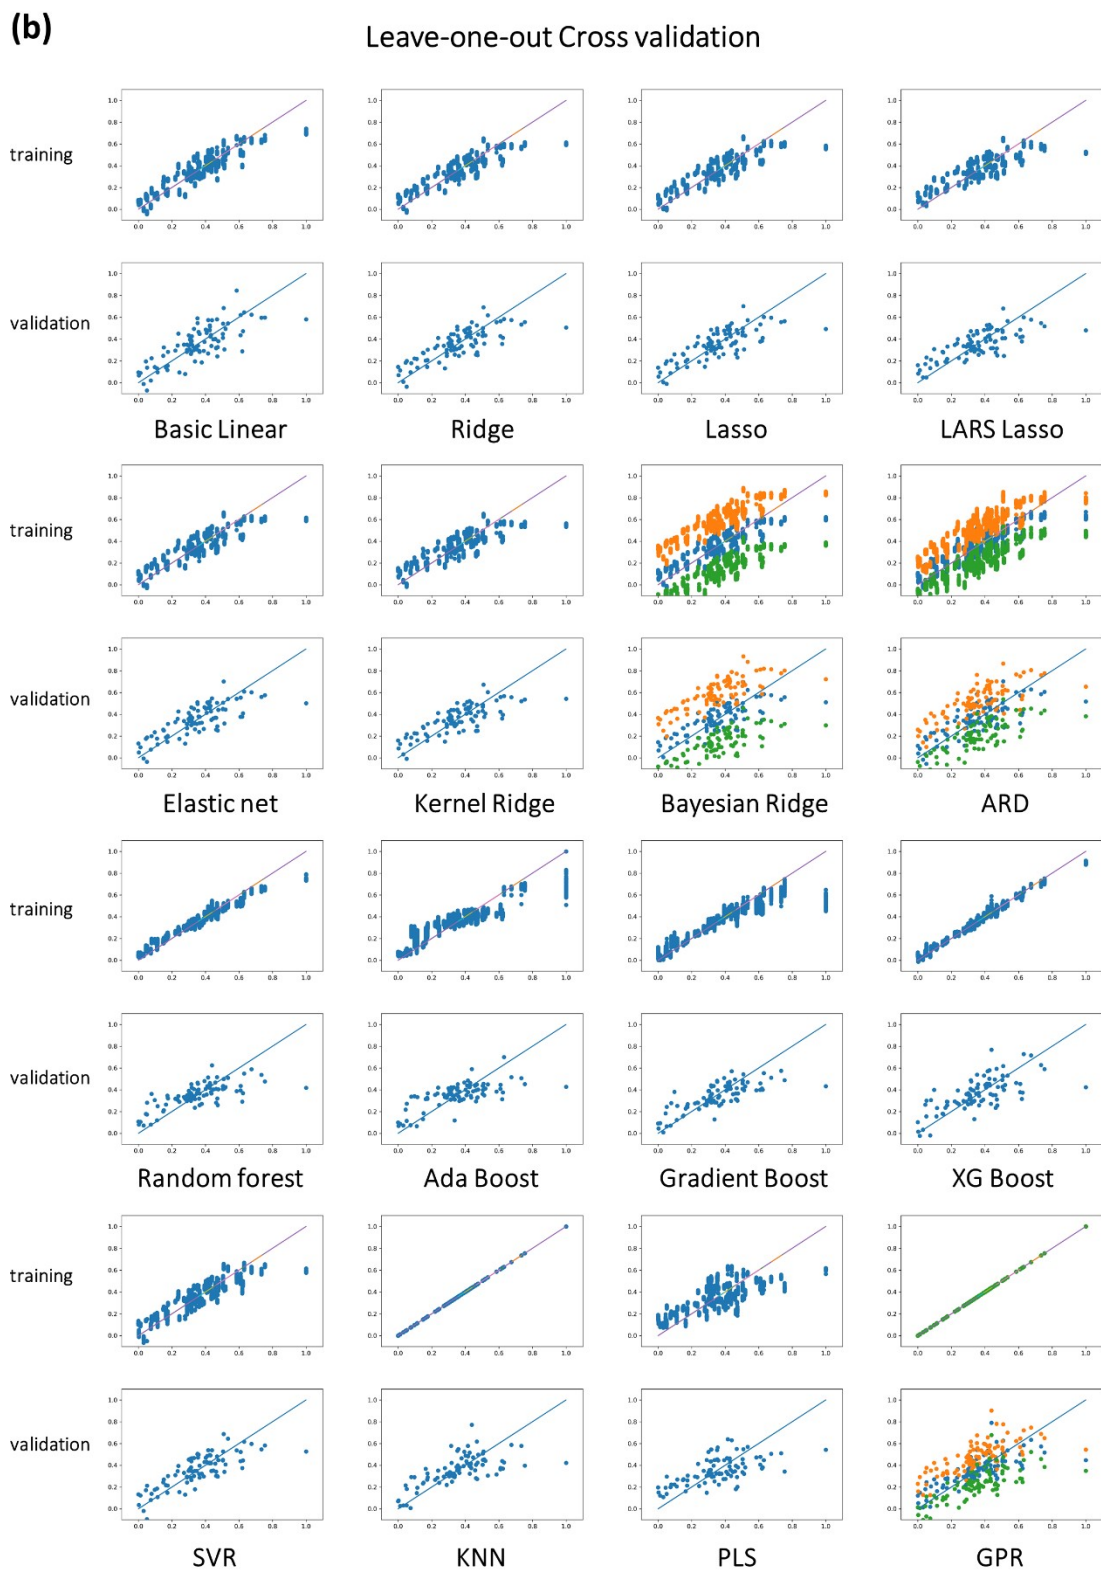

**Fig. S3c** Plots of ML-predicted vs. experimental  $E_g$  for every ML algorithm for leave-one-out cross-validation with no holdout test dataset.

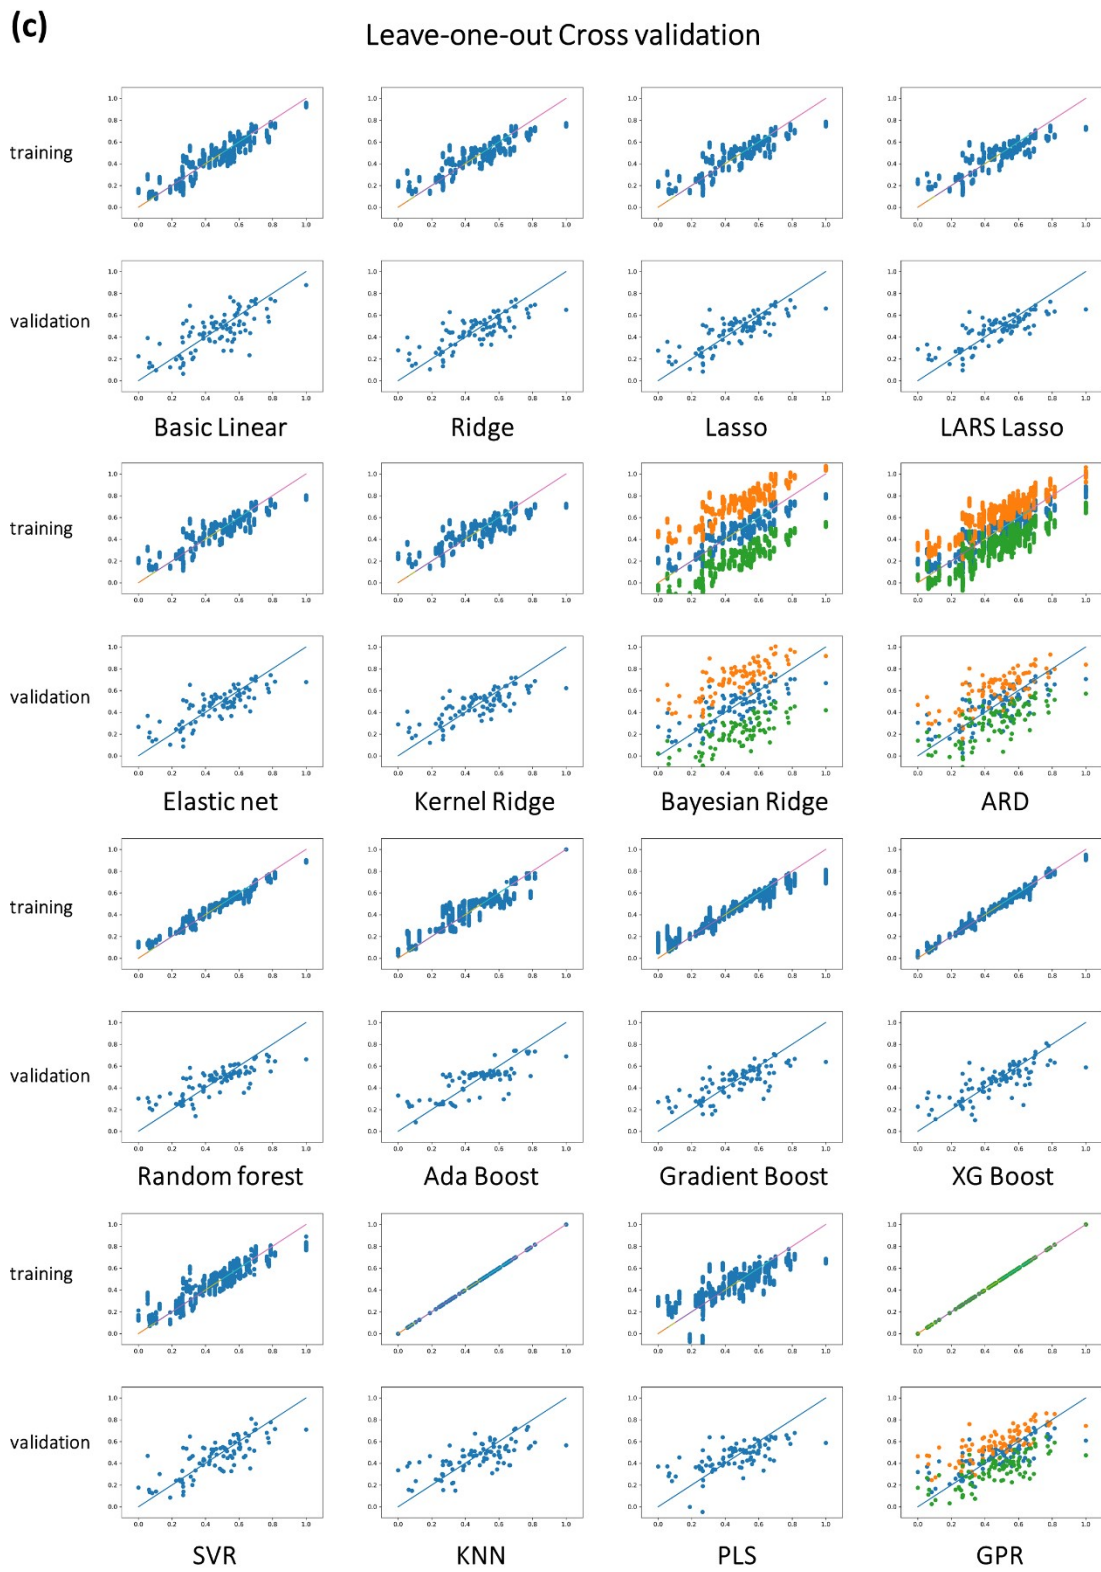

**Fig. S4a** The surrogate ML model regression results. Plots of the ML-predicted vs. experimental PEW for every ML algorithm for 8-fold cross-validation with a holdout dataset test.

**(a) 9-Feature Surrogate Model (8-Fold Cross Validation with Hold-Out Dataset Test)**

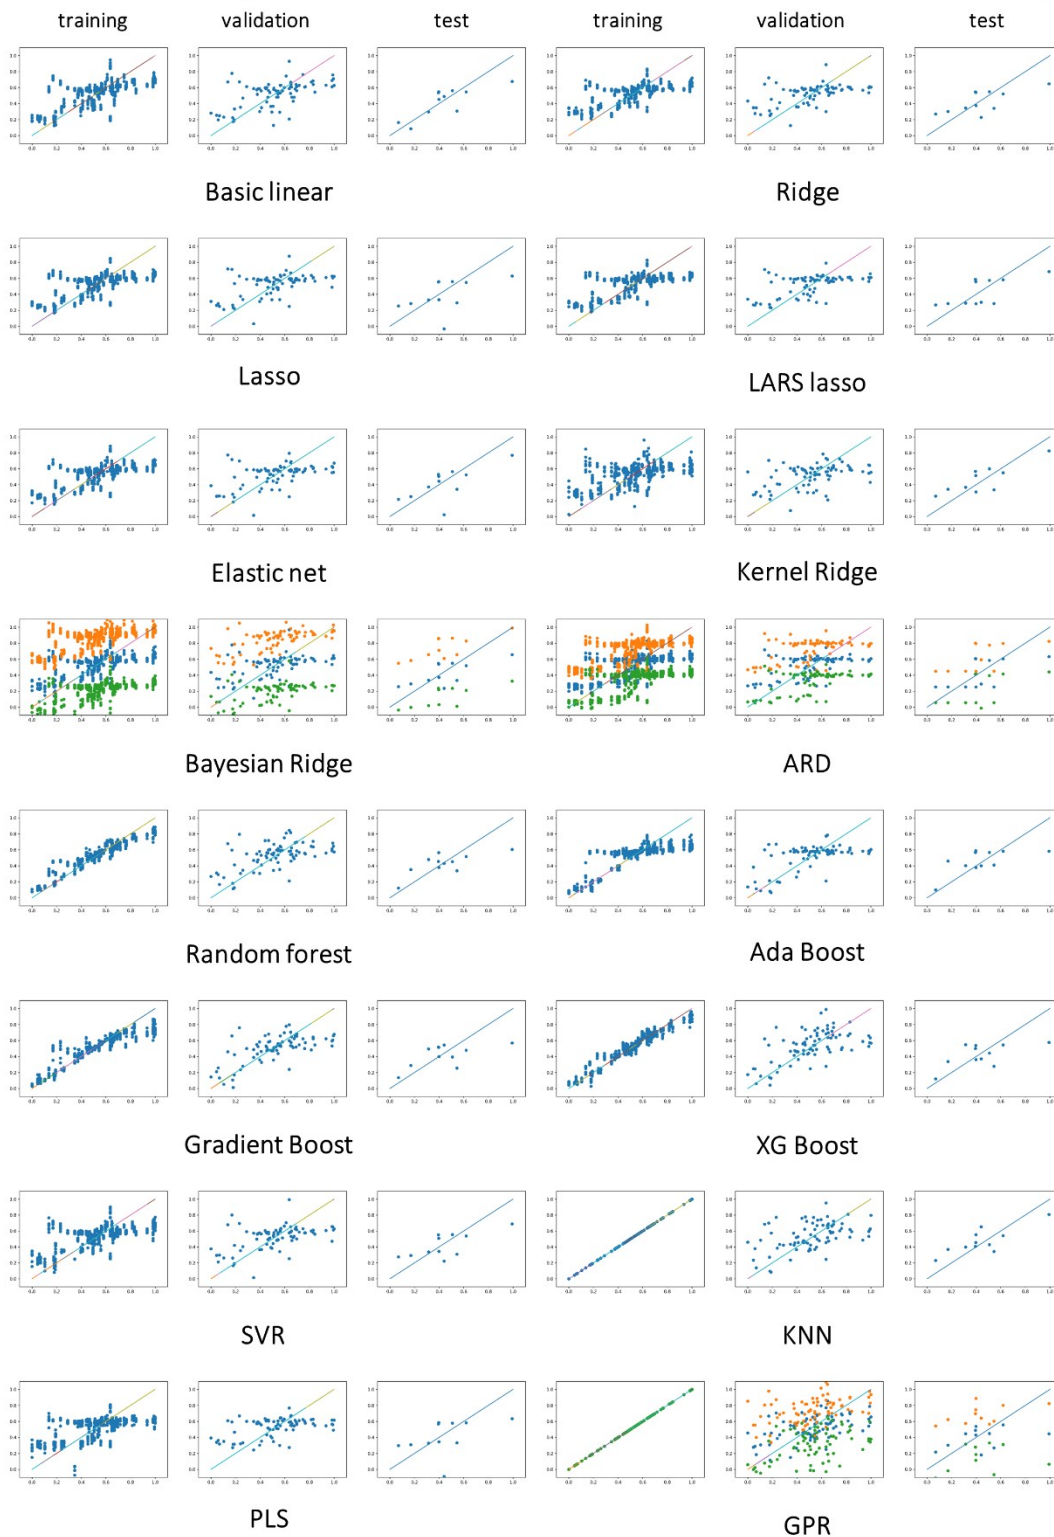

**Fig. S4b** The surrogate ML model regression results. Plots of the ML-predicted vs. experimental EBEW for every ML algorithm for 8-fold cross-validation with a holdout dataset test.

**(b) 9-Feature Surrogate Model (8-Fold Cross Validation with Hold-Out Dataset Test)**

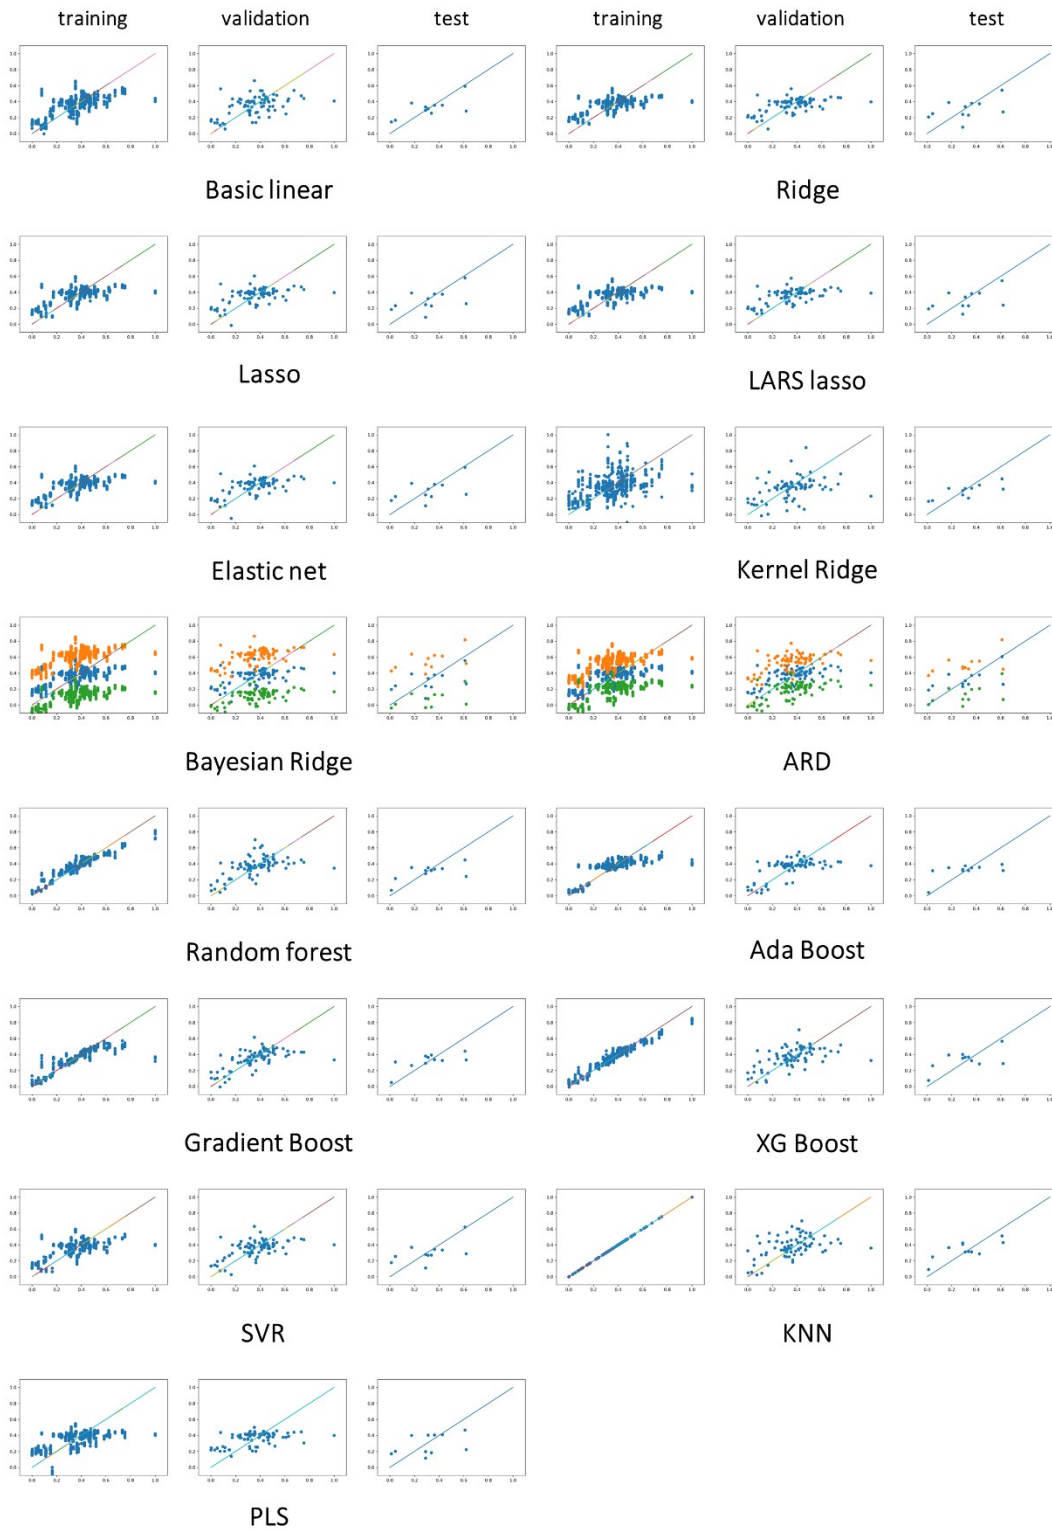

**Fig. S4c** The surrogate ML model regression results. Plots of the ML-predicted vs. experimental  $E_g$  for every ML algorithm for 8-fold cross-validation with a holdout dataset test.

**(c) 9-Feature Surrogate Model (8-Fold Cross Validation with Hold-Out Dataset Test)**

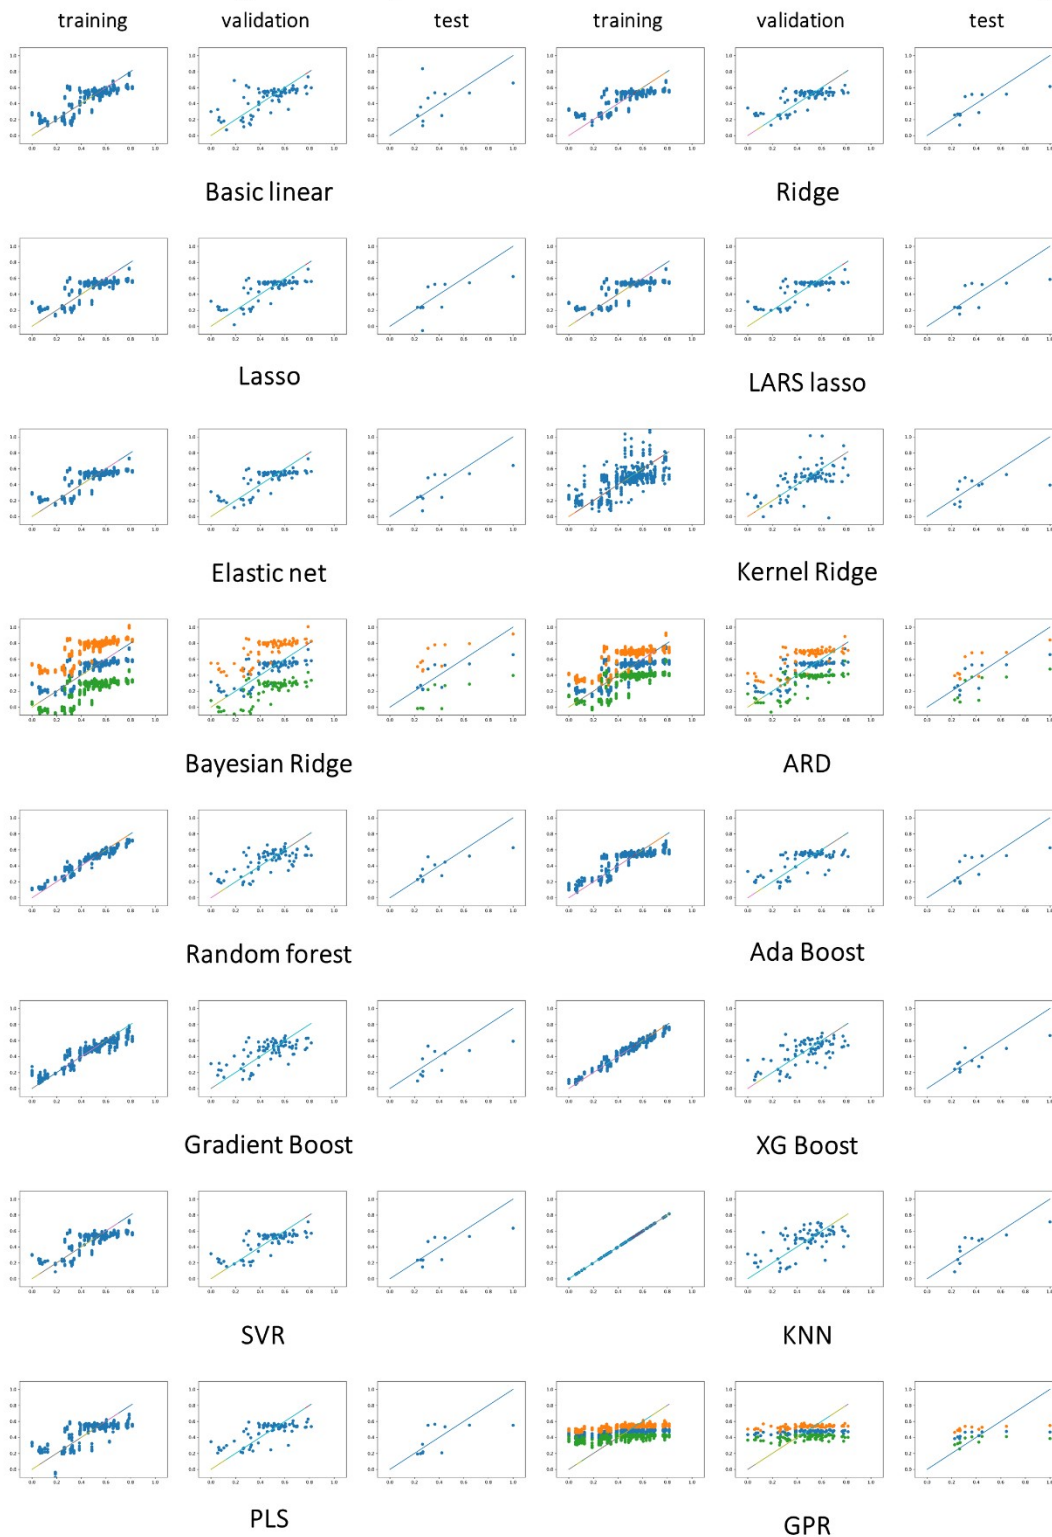

## The data sources for the 91 phosphors used for the present investigation.

(The primary number coincides the entry number used in Fig. 2 and Table S3, and -1 and -2 designate multiple sources for a single entry)

(1-1) Z. Tao, Y. Cheng, Y. Huang, P. Cai, H. J. Seo, Luminescence performance and structural characteristic of  $\text{Eu}^{2+}$ -Activated  $\text{Na}_2\text{BaSi}_2\text{O}_6$  phosphor, *ECS J. Solid State Sci. Technol.*, 2014, **3**, R71-R78.

(1-2) R. P. Gunawardane, M. E. Cradwick, L. S. Dent Glasser, Crystal structure of  $\text{Na}_2\text{BaSi}_2\text{O}_6$ , *J. Chem. Soc., Dalton Trans.*, 1973, 2397-2400.

(2-1) Y. Q. Li, A. C. A. Delsing, R. Metslaar, G. de With, H. T. Hintzen, Photoluminescence properties of rare-earth activated  $\text{BaSi}_7\text{N}_{10}$ , *J. Alloys compd.*, 2009, **487**, 28-33.

(2-2) H. Huppertz, W. Schnick, Edge-sharing  $\text{SiN}_4$  tetrahedra in the highly condensed nitridosilicate  $\text{BaSi}_7\text{N}_{10}$ , *Chem. Eur. J.*, 1997, **3**, 249-252.

(3-1, 30-1) C. J. Duan, X. J. Wang, W. M. A. Otten, C. A. Delsing, J. T. Zhao, H. T. Hintzen, Preparation, electronic structure, and photoluminescence properties of  $\text{Eu}^{2+}$ - and  $\text{Ce}^{3+}/\text{Li}^{+}$ -activated alkaline earth silicon nitride  $\text{MSiN}_2$  (M = Sr, Ba), *Chem. Mater.*, 2008, **20**, 1597-1605.

(3-2, 30-2) Z. A. Gál, P. M. Mallinson, H. J. Orchard, S. J. Clarke, Synthesis and structure of alkaline earth silicon nitrides:  $\text{BaSiN}_2$ ,  $\text{SrSiN}_2$ , and  $\text{CaSiN}_2$ , *Inorg. Chem.*, 2004, **43**, 3998-4006.

(4-1) Y. Xu, Z. Song, Z. Yin, D. Zhou, R. Wang, C. Li, J. Qiu, A novel blue-emitting phosphor  $\text{MgAl}(\text{PO}_4)\text{O}:\text{Eu}^{2+}$  for white LEDs, *Adv. Mat. Res.*, 2011, 311-313, 1222-1226.

(4-2) P. Schmid-Beurmann, F. Brunet, V. Kahlenberg, E. Dachs, Polymorphism and thermochemistry of  $\text{MgAlPO}_4\text{O}$ , a product of lazulite breakdown at high temperature, *Eur. J. Mineral.*, 2007, **19**, 159-172.

(5) J.-L. Yuan, X.-Y. Zeng, J.-T. Zhao, Z.-J. Zhang, H.-H. Chen, G.-B. Zhang, Rietveld refinement and photoluminescent properties of a new blue-emitting material:  $\text{Eu}^{2+}$  activated  $\text{SrZnP}_2\text{O}_7$ , *J. Solid State Chem*, 2007, **180**, 3310-3316.

(6, 53) J. Brgoch, S. D. Klob, K. A. Denault, R. Seshadri, Accessing  $(\text{Ba}_{1-x}\text{Sr}_x)\text{Al}_2\text{Si}_2\text{O}_8:\text{Eu}$  phosphors for solid state white lighting via microwave-assisted preparation: tuning emission color by coordination environment, *Z. Anorg. Allg. Chem.*, 2014, **640**, 1182-1189.

- (7) F.-C. Lu, L.-J. Bai, B.-Z. Yang, Z.-P. Yang, Synthesis, structure and photoluminescence of BaAl<sub>2</sub>Si<sub>2</sub>O<sub>8</sub>:Eu<sup>2+</sup> blue-emitting phosphors, *ECS J. Solid State Sci. Technol.*, 2013, **2**, R254-R257.
- (8-1) P. F. Smet, N. Avci, K. V. den Eeckhout, D. Poelman, Extending the afterglow in CaAl<sub>2</sub>O<sub>4</sub>:Eu,Nd persistent phosphors by electron beam annealing, *Opt. Mater. Express.*, 2012, **2**, 1306-1313.
- (8-2) V. I. Ponomarev, D. M. Kheiker, N. V. Belov, Crystal structure of calcium dialuminate, CA<sub>2</sub>, *Kristallografiya*. 1970, **15**, 1140-1143.
- (9-1) S. Yao, L. Xue, Y. Yan, Photoluminescence properties of M<sub>2</sub>ZnSi<sub>2</sub>O<sub>7</sub>: Eu<sup>2+</sup> (M=Sr, Ba), *J. Rare Earths.*, 2010, **28**, 265-268.
- (9-2) J. W. Kaiser, W. Jeitschko, Crystal structure of the new barium zinc silicate Ba<sub>2</sub>ZnSi<sub>2</sub>O<sub>7</sub>, *Z. Kristallogr. NCS.*, 2002, **217**, 25-26.
- (10) Y.-I. Kim, S.-H. Nahm, W. B. Im, D. Y. Jeon, D. H. Gregory, Structural refinement of Eu doped CaMgSi<sub>2</sub>O<sub>6</sub> using X-ray powder diffraction data, *J. Lumin.*, 2005, **115**, 1-6.
- (11) C.-H. Park, Y.-N. Choi, Crystal structure of BaMg<sub>2</sub>Si<sub>2</sub>O<sub>7</sub> and Eu<sup>2+</sup> luminescence, *J. Solid State Chem.*, 2009, **182**, 1884-1888.
- (12-1) X. Zhang, J. Zhang, R. Wang, M. Gong, Photo-physical behaviors of efficient green phosphor Ba<sub>2</sub>MgSi<sub>2</sub>O<sub>7</sub>:Eu<sup>2+</sup> and its application in light-emitting diodes, *J. Am. Ceram. Soc.*, 2010, **93**, 1368-1371.
- (12-2) M. Ardit, M. Dondi, M. Merlini, G. Cruriani, Melilite-type and melilite-related compounds: structural variations along the join Sr<sub>2-2x</sub>Ba<sub>x</sub>MgSi<sub>2</sub>O<sub>7</sub> (0 ≤ X ≤ 2) and high-pressure behavior of the two end-members, *Phys. Chem. Miner.*, 2012, **39**, 199-211.
- (13-1, 14-1) W. Y. Huang, F. Yoshimura, K. Ueda, Y. Shimomura, H.-S. Sheu, T.-S. Chan, C.-Y. Chiang, W. Zhou, R.-S. Liu, Chemical pressure control for photoluminescence of MSiAl<sub>2</sub>O<sub>3</sub>N<sub>2</sub>:Ce<sup>3+</sup>/Eu<sup>2+</sup> (M = Sr, Ba) oxynitride phosphors, *Chem. Mater.*, 2014, **26**, 2075-2085.
- (13-2, 14-2) R. Lauterbach, W. Schnick, Synthese, kristallstruktur und eigenschaften eines neuen sialons-SrSiAl<sub>2</sub>O<sub>3</sub>N<sub>2</sub>, *Z. anorg. allg. Chem.*, 1998, **624**, 1154-1158.
- (15-1) C. Kulshreshtha, A. K. Sharma, K.-S. Sohn, Effect of Local structures on the luminescence of Li<sub>2</sub> (Sr,Ca,Ba)SiO<sub>4</sub>:Eu<sup>2+</sup>, *J. Electrochem. Soc.*, 2009, **156**, J52-J56.
- (15-2) J. Kim, D. Ahn, C. Kulshreshtha, K.-S. Sohn, N. Shin, Lithium barium silicate, Li<sub>2</sub>BaSiO<sub>4</sub>, from synchrotron powder data, *Acta Crystallogr. Sect. C: Cryst. Struct. Commun.*, 2009, **65**, i14-i16.



- (16-1) Y. Y. Ma, F. Xiao, S. Ye, Q. Y. Zhang, Z. H. Jiang, Y. Qian, Electronic and Luminescence Properties of LiSiON: Eu<sup>2+</sup>, Eu<sup>2+</sup>/Mn<sup>2+</sup> as a Potential Phosphor for UV-Based White LEDs, *ECS J. Solid State Sci. Technol.*, 2012, **1**, R1-R6.
- (16-2) Y. Laurent, J. Guyader, G. Roullet, Etude par diffraction de neutrons selon la méthode du temps de vol de LiSiON $\alpha$ , *Acta Cryst.*, 1981, **B37**, 911-913.
- (17) X. Piao, K.-I. Machida, T. Horikawa, H. Hanzawa, Y. Shimomura, N. Kijima, Preparation of CaAlSiN<sub>3</sub>:Eu<sup>2+</sup> phosphors by the self-propagating high-temperature synthesis and their luminescent properties, *Chem. Mater.*, 2007, **19**, 4592-4599.
- (18-1) S.-S. Yao, L.-H. Xue, Y.-W. Yan, Synthesis and luminescent properties of Eu<sup>2+</sup> doped BaZn<sub>2</sub>Si<sub>2</sub>O<sub>7</sub> phosphors by combustion-assisted synthesis method, *J. Alloys Compd.*, 2011, **509**, 1870-1873.
- (18-2) J. H. Lin, G. X. Lu, M. Z. Su, C.-K. Loong, J. W. Richardson Jr, Phase transition and crystal structures of BaZn<sub>2</sub>Si<sub>2</sub>O<sub>7</sub>, *J. Phys. Chem. Solids.*, 1999, **60**, 975-983.
- (19) W. B. Park, S. P. Singh, K.-S. Sohn, Discovery of a phosphor for light emitting diode applications and its structure determination, Ba(Si,Al)<sub>5</sub>(O,N)<sub>8</sub>:Eu<sup>2+</sup>, *J. Am. Chem. Soc.*, 2014, **136**, 2363-2373.
- (20) H. Watanabe, H. Yamane, N. Kijima, Crystal structure and luminescence of Sr<sub>0.99</sub>Eu<sub>0.01</sub>AlSiN<sub>3</sub>, *J. Solid State Chem.*, 2008, **181**, 1848-1852.
- (21) B. Y. Han, S. P. Singh, K.-S. Sohn, Photoluminescent and structural properties of MgAlSiN<sub>3</sub>:Eu<sup>2+</sup> Phosphors, *J. Electrochem. Soc.*, 2011, **158**, J32-J35.
- (22) H. Yamane, S. Shimooka, K. Uheda, Synthesis, crystal structure and photoluminescence of a new Eu-doped Sr containing sialon (Sr<sub>0.94</sub>Eu<sub>0.06</sub>)(Al<sub>0.3</sub>Si<sub>0.7</sub>)<sub>4</sub>(N<sub>0.8</sub>O<sub>0.2</sub>)<sub>6</sub>, *J. Solid State Chem.*, 2012, **190**, 264-270.
- (23) R.-J. Xie, N. Hirosaki, Y. Li, T. Takeda, Photoluminescence of (Ba<sub>1-x</sub>Eu<sub>x</sub>)Si<sub>6</sub>N<sub>8</sub>O (0.005 ≤ x ≤ 0.2) phosphors, *J. Lumin.*, 2010, **130**, 266-269.
- (24-1) K. Shioi, N. Hirosaki, R.-J. Xie, T. Takeda, Y. Li, Luminescence properties of SrSi<sub>6</sub>N<sub>8</sub>:Eu<sup>2+</sup>, *J. Mater. Sci.*, 2008, **43**, 5659-5661.
- (24-2) F. Stadler, O. Oeckler, J. Senker, H. A. Höpfe, P. Kroll, W. Schnick, SrSi<sub>6</sub>N<sub>8</sub>-A reduced nitridosilicate with a Si-Si bond, *Angew. Chem. Int. Ed.*, 2005, **44**, 567-570.
- (25-1) C. J. Duan, W. M. Otten, A. C. A. Delsing, H. T. Hintzen, Photoluminescence properties of Eu<sup>2+</sup>-activated sialon s-phase BaAlSiO<sub>2</sub>N<sub>7</sub>, *J. Alloys Compd.*, 2008, **461**, 454-458.

- (25-2) S. Esmailzadeh, J. Grins, Z. Shen, M. Edén, M. Thiaux, Study of sialon s-phases  $M_2Al_xSi_{12-x}N_{16-x}O_{2+x}$ ,  $M = Ba$  and  $Ba_{0.9}Eu_{0.1}$ , by X-ray single crystal diffraction, X-ray powder diffraction, and solid-state nuclear magnetic resonance, *Chem. Mater.*, 2004, **16**, 2113-2120.
- (26-1) X. Lan, Q. Wei, Y. Chen, W. Tang, Luminescence properties of  $Eu^{2+}$ -activated  $KMg_4(PO_4)_3$  for blue-emitting phosphor, *Opt. Mater.*, 2012, **34**, 1330-1332.
- (26-2) P. E. Tomaszewski, M. Maczka, A. Majchrowski, A. Waskowska, J. Hanuza, Crystal structure and vibrational properties of  $KMg_4(PO_4)_3$ , *Solid State Sci.*, 2005, **7**, 1201-1208.
- (27-1) V. Bachmann, C. Ronda, O. Oeckler, W. Schnick, A. Meijerink, Color Point Tuning for  $(Sr,Ca,Ba)Si_2O_2N_2:Eu^{2+}$  for White Light LEDs, *Chem. Mater.*, 2009, **21**, 316-325.
- (27-2) J. A. Kechele, O. Oeckler, F. Stadler, W. Schnick, Structure elucidation of  $BaSi_2O_2N_2$  – A host lattice for rare-earth doped luminescent materials in phosphor-converted (pc)-LEDs, *Solid State Sci.*, 2009, **11**, 537-543.
- (28-1, 35-1) P. P. Pal, P. K. Baitha, N. Borgohain, J. Manam, Enhanced photoluminescence emission from  $XSO_4:Eu^{2+}$  ( $X = Mg, Sr$ ) microphosphors, *Indian J. Phys.*, 2014, **88**, 243-250.
- (28-2) J. Coing-Boyat, Structure de la forme hautes temperatures du sulfate anhydre de magnesium, beta- $MgSO_4$ , *Acad. Sci. Comptes Rendus.*, 1962, **255**, 1962-1964.
- (29-1) S. T. Taide, N. B. Ingle, S. K. Omanwar, Optimization and improvement in photoluminescence of rare earth activated willemite salt ( $CaSO_4:Eu^{2+}$ ) prepared by co-precipitation method, *IOSR J. Appl. Phys.*, 2014, 4-6.
- (29-2) H. Morikawa, T. Tomita, I. Minato, S. I. Iwai, Anhydrite: a refinement, *Acta Cryst.*, 1975, **B31**, 2164-2165.
- (31-1) H. J. Song, D. K. Yim, H.-S. Roh, I. S. Cho, S.-J. Kim, Y.-H. Jin, H.-W. Shim, D.-W. Kim, K. S. Hong,  $RbBaPO_4:Eu^{2+}$ : a new alternative blue-emitting phosphor for UV-based white light emitting diodes, *J. Mater. Chem. C.*, 2013, **1**, 500-505.
- (31-2) L. ElAmmari, B. Elouadi, Crystal structure of the orthophosphate  $RbBaPO_4$ , *J. Alloys Compd.*, 1992, **188**, 99-101.
- (32-1) J. Manam, P. Kumari, S. Das, Characterization and photoluminescence studies of  $Eu^{2+}$ -doped  $BaSO_4$  phosphor prepared by the recrystallization method, *Appl Phys A.*, 2011, **104**, 197-203.
- (32-2) R. W. James, W. A. Wood, The crystal structures of barites, celestine and anglesite, *Proc. Math.*

*Phys. Eng. Sci.*, 1925, **109**, 598-620.

(33, 34) M. P. Saradhi, S. Boudin, U. V. Varadaraju, B. Raveau, A new  $\text{BaB}_2\text{Si}_2\text{O}_8$  : $\text{Eu}^{2+}/\text{Eu}^{3+}$ ,  $\text{Tb}^{3+}$  phosphor –synthesis and photoluminescence properties, *J. Solid State Chem.*, 2010, **183**, 2496-2500.

(35-2) K. Burger, D. Cox, R. Papoular, W. Prandl, The application of resonant scattering techniques to Ab initio structure solution from powder data using  $\text{SrSO}_4$  as a test case, *J. Appl. Cryst.*, 1998, **31**, 789-797.

(36) P. Pust, F. Hintze, C. Hecht, V. Weiler, A. Locher, D. Zitnanska, S. Harm, D. U. Wiechert, P. J. Schmidt; W. Schnick, Group (III) nitrides  $\text{M}[\text{Mg}_2\text{Al}_2\text{N}_4]$  ( $\text{M} = \text{Ca}, \text{Sr}, \text{Ba}, \text{Eu}$ ) and  $\text{Ba}[\text{Mg}_2\text{Ga}_2\text{N}_4]$  structural relation and non-typical luminescence properties of  $\text{Eu}^{2+}$  doped samples, *Chem. Mater.*, 2014, **26**, 6113-6119.

(37-1) C. Liu, S. Zhang, Z. Liu, H. Liang, S. Sun, Y. Tao, A potential cyan-emitting phosphor  $\text{Sr}_8(\text{Si}_4\text{O}_{12})\text{Cl}_8:\text{Eu}^{2+}$  for wide color gamut 3D-PDP and 3D-FED, *J. Mater. Chem. C.*, 2013, **1**, 1305-1308.

(37-2) J. Wang, G. Li, S. Tian, F. Liao, X. Jing, The composition, luminescence, and structure of  $\text{Sr}_8[\text{Si}_4\text{O}_{12}]\text{Cl}_8:\text{Eu}^{2+}$ , *Mater. Res. Bull.*, 2001, **36**, 2051-2057.

(38) P. Pust, A. S. Wochnik, E. Baumann, P. J. Schmidt, D. Wiechert, C. Scheu, W. Schnick,  $\text{Ca}[\text{LiAl}_3\text{N}_4]:\text{Eu}^{2+}$  A narrow-band red-emitting nitridolithoaluminate, *Chem. Mater.*, 2014, **26**, 3544-3549.

(39) S. Schmiechen, H. Schneider, P. Wagatha, C. Hecht, P. J. Schmidt, W. Schnick, Toward new phosphors for application in illumination-grade white pc-LEDs: the nitridomagnesosilicates  $\text{Ca}[\text{Mg}_3\text{SiN}_4]:\text{Ce}^{3+}$ ,  $\text{Sr}[\text{Mg}_3\text{SiN}_4]:\text{Eu}^{2+}$ , and  $\text{Eu}[\text{Mg}_3\text{SiN}_4]$ , *Chem. Mater.*, 2014, **26**, 2712-2719.

(40-1) R. P. Sonekar, S. K. Omanwar, S. V. Moharil, Combustion synthesis and photoluminescence of  $\text{Eu}^{2+}$  doped  $\text{BaB}_8\text{O}_{13}$ , *Indian J. Pure & Appl. Phys.*, 2009, **47**, 441-443.

(40-2) J. Krogh-Moe, M. Ihara, On the crystal structure of barium tetraborate,  $\text{Ba}_{0.4}\text{B}_2\text{O}_3$ , *Acta Cryst.*, 1969, **B25**, 2153-2154.

(41) Y. Luo, Z. G. Xia, Effect of partial nitridation on the structure and luminescence properties of melilite-type  $\text{Ca}_2\text{Al}_2\text{SiO}_7:\text{Eu}^{2+}$  phosphor, *Opt. Mater.*, 2014, **36**, 1874-1878.

(42) C.-H. Huang, Y.-T. Lai, T.-S. Chan, Y.-T. Yeh, W.-R. Liu, A novel green-emitting  $\text{SrCaSiAl}_2\text{O}_7:\text{Eu}^{2+}$  phosphor for white LEDs, *RSC Adv.*, 2014, **4**, 7811-7817.

(43) Y. Q. Li, N. Hirosaki, R.-J. Xie, M. Mitomo, Crystal, electronic and luminescence properties of

Eu<sup>2+</sup>-doped Sr<sub>2</sub>Al<sub>2-x</sub>Si<sub>1+x</sub>O<sub>7-x</sub>N<sub>x</sub>, *Sci. Technol. Adv. Mater.*, 2007, **8**, 607-616.

(44-1) L. Jiang, C. Chang, D. Mao, B. A Zhang, new long persistent blue-emitting Sr<sub>2</sub>ZnSi<sub>2</sub>O<sub>7</sub>:Eu<sup>2+</sup>, Dy<sup>3+</sup> prepared by sol-gel method, *Mater. Lett.*, 2004, **58**, 1825-1829.

(44-2) M. Ardit, G. Cruciani, M. Dondi, The crystal structure of Sr-hardystonite, Sr<sub>2</sub>ZnSi<sub>2</sub>O<sub>7</sub>, *Z. Kristallogr.*, 2010, **225**, 298-301.

(45) L. Jiang, C. Chang, D. Mao, C. Feng, Concentration quenching of Eu<sup>2+</sup> in Ca<sub>2</sub>MgSi<sub>2</sub>O<sub>7</sub>:Eu<sup>2+</sup> phosphor, *Mater. Sci. Eng.*, 2003, **B103**, 271-275.

(46-1) K. H. Kwon, W. B. Im, D. Y. Jeon, Energy transfer in Sr<sub>2</sub>MgSi<sub>2</sub>O<sub>7</sub>:Eu<sup>2+</sup> phosphors in nano scale and their application to solid state lighting with excellent color rendering, *J. Nanosci. Nanotechnol.*, 2013, **13**, 4079-4083.

(46-2) H. Yang, R. M. Hazen, R. T. Downs, L. W. Finger, Structural change associated with the incommensurate-normal phase transition in akermanite, CaMgSi<sub>2</sub>O<sub>7</sub>, at high pressure, *Phys. Chem. Miner.*, 1997, **24**, 510-519.

(47-1) X. Zhang, J. Zhang, J. Xu, Q. Su, Luminescent properties of Eu<sup>2+</sup>-activated SrLaGa<sub>3</sub>S<sub>6</sub>O phosphor, *J. alloys. Compd.*, 2005, **389**, 247-251.

(47-2) C. L. Teske, On oxidesulfides of Akermanitetype-structure CaLaGa<sub>3</sub>S<sub>6</sub>O, SrLaGa<sub>3</sub>S<sub>6</sub>O, La<sub>2</sub>ZnGa<sub>2</sub>S<sub>6</sub>O, and Sr<sub>2</sub>ZnGe<sub>2</sub>S<sub>6</sub>O, *Z. Anorg. Allg. Chem.*, 1950, **531**, 52-60.

(48-1) J. Liu, J. Sun, C. Shi, A new luminescent material: Li<sub>2</sub>CaSiO<sub>4</sub>:Eu<sup>2+</sup>, *Mater. Lett.*, 2006, **60**, 2830-2833.

(48-2) J. A. Gard, A. R. West, Preparation and crystal structure of Li<sub>2</sub>CaSiO<sub>4</sub> and isostructural Li<sub>2</sub>CaGeO<sub>4</sub>, *J. Solid State Chem.*, 1973, **7**, 422-427.

(49-1, 50-1) S. Su, W. Liu, R. Duan, L. Cao, G. Su, C. Zhao, Near UV-pumped bluish-white emitting K(Ba,Sr,Ca)BP<sub>2</sub>O<sub>8</sub>:Eu<sup>2+</sup> phosphors, *J. alloys compd.*, 2013, **575**, 309-313.

(49-2, 50-2) D. Zhao, W.-D. Cheng, H. Zhang, S.-P. Huang, Z. Xie, W.-L. Zhang, S.-L. Yang, KMBP<sub>2</sub>O<sub>8</sub> (M = Sr, Ba): A new kind of noncentrosymmetry borophosphate with the three-dimensional diamond-like framework, *Inorg. Chem.*, 2009, **48**, 6623-6629.

(51-1) B. Yuan, Y. Huang, Y. M. Yu, S. I. Kim, H. J. Seo, A new blue-emitting phosphor of Eu<sup>2+</sup>-doped BaMgSi<sub>4</sub>O<sub>10</sub>, *Mater. Lett.*, 2012, **70**, 57-59.

(51-2) R. M. Hazen, L. W. Finger, High-pressure and high-temperature crystallographic study of the

gillespite I-II phase transition, *Am. Mineral.*, 1983, **68**, 595-603.

(52) M. Jiao, Y. Jia, W. Lü, W. Lv, Q. Zhao, B. Shao, You, H.  $\text{Sr}_3\text{GdNa}(\text{PO}_4)_3\text{F}:\text{Eu}^{2+}, \text{Mn}^{2+}$ : a potential color tunable phosphor for white LEDs, *J. Mater. Chem. C.*, 2014, **2**, 90-97.

(54-1) L. Liu, R.-J. Xie, N. Hirosaki, B. Dierre, T. Sekiguchi, Luminescence properties of a blueemitting phosphor:  $(\text{Sr}_{1-x}\text{Eu}_x)\text{Si}_9\text{Al}_{19}\text{ON}_{31}$  ( $0 < x \leq 1$ ), *J. Solid State Chem.*, 2013, **207**, 49-54.

(54-2) J. Grins, S. Esmailzadeh, G. Svensson, Z. J. Shen, High-resolution electron microscopy of a Sr-containing sialon polytypoid phase, *J. Eur. Ceram. Soc.*, 1999, **19**, 2723-2730.

(55-1) M. P. Saradhi, U. V. Varadaraju, Photoluminescence studies on  $\text{Eu}^{2+}$ -activated  $\text{Li}_2\text{SrSiO}_4$ -a potential orange-yellow phosphor for solid-state lighting, *Chem. Mater.*, 2006, **18**, 5267-5272.

(55-2) Y. Hirano, T. Iwata, K. Momma, K. Fukuda, Electron density distribution and crystal structure of lithium strontium silicate,  $\text{Li}_2\text{SrSiO}_4$ , *Powder Diffr.*, 2010, **25**, 4-8.

(56-1) Y. Lan, L. Yi, L. Zhou, Z. Tong, F. Gong, R. Wang, Synthesis and luminescence properties of  $\text{SrBPO}_5:\text{Eu}^{2+}, \text{Mn}^{2+}$  phosphor for light-emitting diodes, *Physica B.*, 2010, **405**, 3489-3491.

(56-2) S. Pan, W. Xicheng, F. P. Zhen, Z. Guochun, L. Zhihua, D. Chenxia, C. Chuangyan, Growth, structure and properties of single crystals of  $\text{SrBPO}_5$ , *Chem. Mater.*, 2003, **15**, 2218-2221.

(57, 58) K. Shioi, N. Hirosaki, R.-J. Xie, T. Takeda, Y. Q. Li, Y. Matsushita, Synthesis, crystal structure, and photoluminescence of Sr- $\alpha$ -SiAlON: $\text{Eu}^{2+}$ , *J. Am. Ceram. Soc.*, 2010, **93**, 465-469.

(59-1) X. Zhang, F. Mo, L. Zhou, M. Gong, Properties-structure relationship research on  $\text{LiCaPO}_4:\text{Eu}^{2+}$  as blue phosphor for NUV LED application, *J. Alloys compd.*, 2013, **575**, 314-318.

(59-2) P. Lightfoot, M. C. Pienkowski, P. G. Bruce, I. Abrahams, Synthesis and structure of  $\text{LiCaPO}_4$ , by combined X-ray and neutron powder diffraction, *J. Mater. Chem.*, 1991, **1**, 1061-1063.

(60) Z. Tao, Y. Huang, P. Cai, I. Kim, H. J. Seo, Synthesis and efficient blue-emitting of  $\text{Eu}^{2+}$ -activated borate fluoride  $\text{BaAlBO}_3\text{F}_2$ , *Opt. Mater.*, 2014, **37**, 287-292.

(61-1) R. Yu, H. Li, H. Ma, C. Wang, H. Wang, Luminescence centers and spectrum characteristics of a novel  $\text{Eu}^{2+}$ -activated hexa-aluminate  $\text{CaZrBAl}_9\text{O}_{18}$ , *Phys. Status Solidi. A.*, 2014, **211**, 811-816.

(61-2) T. Armbruster, N. Döbelin, A. Peretti, D. Günther, E. Reusser, B. Grobety, The crystal structure of painite  $\text{CaZrB}[\text{Al}_9\text{O}_{18}]$  revisited, *Am. Mineral.*, 2004, **89**, 610-613.

(62) Y. Q. Li, C. M. Fang, G. de With, H. T. Hintzen, Preparation, structure and photoluminescence properties of  $\text{Eu}^{2+}$  and  $\text{Ce}^{3+}$ -doped  $\text{SrYSi}_4\text{N}_7$ , *J. Solid state Chem.*, 2004, **177**, 4687-4694.

- (63, 64, 65) T. Horikawa, M. Fujitani, H. Hanazawa, K.-I. Machida, Structure and photoluminescence properties of  $\text{MIIMIISi}_4\text{N}_7:\text{Eu}^{2+}$  (MII = Ca, Sr, Ba / MIII = Sc, Y, La) phosphors prepared by carbothermal reduction and nitridation, *ECS J. Solid State Sci. Technol.*, 2012, **1**, R113-R118.
- (66) D.-Y. Wang, C.-H. Huang, Y.-C. Wu, T.-M. Chen,  $\text{BaZrSi}_3\text{O}_9:\text{Eu}^{2+}$ : a cyan-emitting phosphor with high quantum efficiency for white light-emitting diodes, *J. Mater. Chem.*, 2011, **21**, 10818-10822.
- (67) D. Y. Wang, Y. C. Wu, T. M. Chen, Synthesis, crystal structure, and photoluminescence of a novel blue-green emitting phosphor:  $\text{BaHfSi}_3\text{O}_9:\text{Eu}^{2+}$ , *J. Mater. Chem.*, 2011, **21**, 18261-18265.
- (68-1) J. Chen, Y.-G. Liu, H. Liu, D. Yang, H. Ding, M. Fang, Z. Huang, The luminescence properties of novel  $\alpha\text{-Mg}_2\text{Al}_4\text{Si}_5\text{O}_{18}:\text{Eu}^{2+}$  phosphor prepared in air, *RCS adv.*, 2014, **4**, 18234-18239.
- (68-2) P. Predecki, J. Haas, J. Faber, R. L. Hitterman, Structural aspects of the lattice thermal expansion of hexagonal cordierite, *J. Am. Ceram. Soc.*, 1987, **70**, 175-182.
- (69-1) T. L. Zhou, Z. Song, X. P. Song, L. Bian, Q. L. Liu, A red oxide phosphor,  $\text{Sr}_2\text{ScAlO}_5:\text{Eu}^{2+}$  with perovskite-type structure, for white light-emitting diodes, *Chin. Phys. B*, 2010, **19**, 127808-1-4.
- (69-2) M. Rath, H. Müller-Buschbaum, Ein beitrag zur kristallstruktur von  $\text{Ba}_2\text{ScAlO}_5$  und  $\text{Sr}_2\text{Sc}_{0.5}\text{Al}_{1.5}\text{O}_5$ , *J. Alloys Compd.*, 1992, **189**, 127-130.
- (70-1) T.-W. Kuo, C.-H. Huang, T.-M. Chen, Novel yellowish-orange  $\text{Sr}_8\text{Al}_{12}\text{O}_{24}\text{S}_2:\text{Eu}^{2+}$  phosphor for application in blue light-emitting diode based white LED, *Opt. Express*, 2010, **18**, A231-A236.
- (70-2) M. E. Brenchley, M. T. Weller, Synthesis and structure of sulfide aluminate sodalities, *J. Mater. Chem.*, 1992, **2**, 1003-1005.
- (71-1) S.-J. Gao, T. Li, Z.-C. Zhang, P.-L. Li, Z.-J. Wang, Z.-P. Yang,  $\text{Sr}_3\text{Bi}(\text{PO}_4)_3:\text{Eu}^{2+}$  Luminescence, concentration quenching and crystallographic sites, *Chin. Phys. Lett.*, 2014, **31**, 073301-073304.
- (71-2) P. P. Sahoo, T. N. G. Row, Crystal chemistry of the noncentrosymmetric eulytites:  $\text{A}_3\text{Bi}(\text{XO}_4)_3$  (X = V, A = Pb; X = P, A = Ca, Cd, Sr, Pb), *Inorg. Chem.*, 2010, **49**, 10013-10021.
- (72) Z. Jiang, Z. Sun, X. Su, L. Duan and X. Yu, Crystal structure and luminescence properties of  $\text{Eu}^{2+}$  activated  $\text{Sr}_{12}\text{Al}_{14}\text{O}_{32}\text{Cl}_2$ : A potential green-emitting phosphor for near UV light-emitting diodes, *J. Alloys Compd.*, 2013, **577**, 683-686.
- (73) T. Iwata, M. Haniuda and K. Fukuda, Crystal structure of  $\text{Ca}_{12}\text{Al}_{14}\text{O}_{32}\text{Cl}_2$  and luminescence properties of  $\text{Ca}_{12}\text{Al}_{14}\text{O}_{32}\text{Cl}_2:\text{Eu}^{2+}$ , *J. Solid State Chem.*, 2008, **181**, 51-55.
- (74-1) W. Zhang, D. Wie and H. J. Seo,  $\text{Eu}^{2+}$ -doped pollucite  $\text{CsAlSi}_2\text{O}_6$  with high luminescence

efficiency for UV-pumped light-emitting diodes, *Mater. Lett.*, 2013, **94**, 140-142.

(74-2) S. Naray-Szabo, Die struktur des pollucits  $\text{CsAlSi}_2\text{O}_6 \cdot \text{H}_2\text{O}$ , *Zeitschrift für Kristallographie*, 1938, **99**, 277-282.

(75) Q. Wang, D. Deng, S. Xu, Y. Hua, L. Huang, H. Wang, S. Zhao, G. Jia and C. Li, Crystal structure and photoluminescence properties of  $\text{Eu}^{2+}$ -activated  $\text{Ba}_2\text{LiB}_5\text{O}_{10}$  phosphors, *Opt. Commun.*, 2011, **284**, 5315-5318.

(76) R.S. Palasagar, A.B. Gawandea, R.P. Sonekar and S.K. Omanwar,  $\text{Eu}^{3+} \rightarrow \text{Eu}^{2+}$  reduction in  $\text{BaAl}_2\text{B}_2\text{O}_7$  phosphor in oxidizing environment, *Optik*, 2015, **126**, 5030-5032.

(77) K.-Y. Yeh, C.-C. Yang, W.-R. Liu and M.G. Brik, Novel blue-emitting phosphors -  $\text{BaBeSiO}_4:\text{Eu}^{2+}$ : luminescence properties and its application for UV-light emitting diodes, *Opt Mater Express*, 2016, **6**, 416-428.

(78) S.-P. Lee, T.-S. Chan, S. Dutta and T.-M. Chen, Novel  $\text{Eu}^{2+}$ -activated thiogallate phosphors for white LED applications: structural and spectroscopic analysis, *RSC Adv.*, 2018, **8**, 11725-11730.

(79) S. Schmiechen, P. Strobel, C. Hecht, T. Reith, M. Siegert, P. J. Schmidt, P. Huppertz, D. Wiechert and W. Schnick, Nitridomagnesosilicate  $\text{Ba}[\text{Mg}_3\text{SiN}_4]:\text{Eu}^{2+}$  and Structure-Property Relations of Similar Narrow-Band Red Nitride Phosphors, *Chem. Mater.*, 2015, **27**, 1780-1785.

(80) Y.-K. Kim, S. Choi and H.-K. Jung, Photoluminescence properties of  $\text{Eu}^{2+}$  and  $\text{Mn}^{2+}$ -activated  $\text{BaMgP}_2\text{O}_7$  as a potential red phosphor for white-emission, *J. Lumin.*, 2010, **130**, 60-64.

(81) C. Zhao, Z. Xia and M. Li,  $\text{Eu}^{2+}$ -activated full color orthophosphate phosphors for warm white light-emitting diodes, *RSC Adv.*, 2014, **4**, 33114.

(82) Z. C. Wu, J. X. Shi, J. Wang, M. L. Gong and Q. Su, A novel blue-emitting phosphor  $\text{LiSrPO}_4:\text{Eu}^{2+}$  for white LEDs, *J. Solid State Chem.*, 2006, **179**, 2356-2360.

(83) M. Zhao, H. Liao, L. Ning, Q. Zhang, Q. Liu and Z. Xia, Next-generation narrow-band green-emitting  $\text{RbLi}(\text{Li}_3\text{SiO}_4)_2:\text{Eu}^{2+}$  phosphor for backlight display application, *Adv. Mater.*, 2018, **30**, 1802489.

(84) G. Li, M. Li, L. Li, H. Yu, H. Zou, L. Zou, S. Gan and X. Xu, Luminescent properties of  $\text{Sr}_2\text{Al}_2\text{SiO}_7:\text{Ce}^{3+},\text{Eu}^{2+}$  phosphors for near UV-excited white light-emitting diodes, *Mater. Lett.*, 2011, **65**, 3418-3420.

(85) M.-H. Fang, Leañó, Jr. J. L. and R.-S. Liu, Control of narrow-band emission in phosphor materials

for application in light-emitting diodes, *ACS Energy Lett.*, 2018, **3**, 2573-2586.

(86) D. Dutczak, T. Jüstel, C. Ronda and A. Meijerink,  $\text{Eu}^{2+}$  luminescence in strontium aluminates, *Phys. Chem. Chem. Phys.*, 2015, **17**, 15236-15249.

(87-1) C. B. Palan, N. S. Bajaj and S. K. Omanwar, Luminescence properties of  $\text{Eu}^{2+}$  doped  $\text{SrB}_4\text{O}_7$  phosphor for radiation dosimetry, *Mater. Res. Bull.*, 2016, **76**, 216-221.

(87-2) A. Perloff and S. Block, The crystal structure of the strontium and lead tetraborates,  $\text{SrO} \cdot 2\text{B}_2\text{O}_3$  and  $\text{PbO} \cdot 2\text{B}_2\text{O}_3$ , *Acta Cryst.*, 1981, **20**, 274-279.

(88) D. Cao, H. Wang, H. Wei and W. Yang, Preparation, electronic structure, and photoluminescent properties of  $\text{Eu}^{2+}$  activated  $\text{BaSi}_2\text{O}_5$  powder phosphors for solid-state lighting, *J. Semicond.*, 2015, **36**, 123008.

(89) M. Derbel, A. Mbarek and M. Fourati, Photoluminescence properties of  $\text{CdSrP}_2\text{O}_7:\text{Eu}^{2+}$  blue phosphor for white LED applications, *Optik*, 2016, **127**, 5870-5875.

(90) Z. Yang, D. Xu, J. Du, X. Gao and J. Sun, Tunable luminescence and energy transfer of a  $\text{Eu}^{2+}/\text{Mn}^{2+}$  co-doped  $\text{Sr}_3\text{Na}_V(\text{PO}_4)_3\text{F}$  phosphor for white LEDs, *RSC Adv.*, 2016, **6**, 87493-87501.

(91) H. Kang, K. N. Lee, S. Unithrattil, H. J. Kim, J. H. Oh, J. S. Yoo, W. B. Im and Y. R. Do, Narrow-band  $\text{SrMgAl}_{10}\text{O}_{17}:\text{Eu}^{2+},\text{Mn}^{2+}$  green phosphors for wide-color-gamut backlight for LCD displays, *ACS Omega*, 2020, **5**, 19516-19524.
